# Supplementary material for: New insights from the application of ZooMS to Late Pleistocene fauna from Grotta di Castelcivita, southern Italy
Source: Sci Rep. 2025 Jul 17;15:25906. doi: 10.1038/s41598-025-11355-6 (PMC12267457; doi:10.1038/s41598-025-11355-6)
Supplement: Supplementary file 1 — Supplementary Material 1 [file 41598_2025_11355_MOESM1_ESM.xlsx]

## Sheet: Batch 1
	1	2	3	4	5	6	7	8	9	10	11	12	13	14	15	16	17	18	19	20	21	22	23	24
A	CLC007	CLC008	CLC009	CLC015	CLC016	CLC017	CLC023	CLC024	CLC025	CLC030	CLC031	CLC032	CLC038	CLC039	CLC040	CLC046	CLC047	CLC048	CLC053	CLC054	CLC055	CLC061	CLC062	B	1:10 dilution
B	CLC014	CAL	CLC010	CLC022	CAL	CLC018	CLC029	CAL	CLC026	CLC037	CAL	CLC033	CLC045	CAL	CLC041	B	CAL	CLC049	CLC060	CAL	CLC056	CLC067	CAL	CLC063
C	CLC013	CLC012	CLC011	CLC021	CLC020	CLC019	B	CLC028	CLC027	CLC036	CLC035	CLC034	CLC044	CLC043	CLC042	CLC052	CLC051	CLC050	CLC059	CLC058	CLC057	CLC066	CLC065	CLC064	MTP 384 ground steel
D	CLC007	CLC008	CLC009	CLC015	CLC016	CLC017	CLC023	CLC024	CLC025	CLC030	CLC031	CLC032	CLC038	CLC039	CLC040	CLC046	CLC047	CLC048	CLC053	CLC054	CLC055	CLC061	CLC062	B	ID210 1004770
E	CLC014	CAL	CLC010	CLC022	CAL	CLC018	CLC029	CAL	CLC026	CLC037	CAL	CLC033	CLC045	CAL	CLC041	B	CAL	CLC049	CLC060	CAL	CLC056	CLC067	CAL	CLC063
F	CLC013	CLC012	CLC011	CLC021	CLC020	CLC019	B	CLC028	CLC027	CLC036	CLC035	CLC034	CLC044	CLC043	CLC042	CLC052	CLC051	CLC050	CLC059	CLC058	CLC057	CLC066	CLC065	CLC064
G	CLC007	CLC008	CLC009	CLC015	CLC016	CLC017	CLC023	CLC024	CLC025	CLC030	CLC031	CLC032	CLC038	CLC039	CLC040	CLC046	CLC047	CLC048	CLC053	CLC054	CLC055	CLC061	CLC062	B
H	CLC014	CAL	CLC010	CLC022	CAL	CLC018	CLC029	CAL	CLC026	CLC037	CAL	CLC033	CLC045	CAL	CLC041	B	CAL	CLC049	CLC060	CAL	CLC056	CLC067	CAL	CLC063
I	CLC013	CLC012	CLC011	CLC021	CLC020	CLC019	B	CLC028	CLC027	CLC036	CLC035	CLC034	CLC044	CLC043	CLC042	CLC052	CLC051	CLC050	CLC059	CLC058	CLC057	CLC066	CLC065	CLC064
J	CLC068	CLC069	CLC070	B	CLC076	CLC077	CLC083	CLC084	CLC085				CLC068	CLC069	CLC070	B	CLC076	CLC077	CLC083	CLC084	CLC085
K	CLC075	CAL	CLC071	CLC082	CAL	CLC078		CAL	CLC086		CAL		CLC075	CAL	CLC071	CLC082	CAL	CLC078	CAL	CLC086	CAL		CAL
L	CLC074	CLC073	CLC072	CLC081	CLC080	CLC079							CLC074	CLC073	CLC072	CLC081	CLC080	CLC079
M	CLC075	CAL	CLC071	CLC082	CAL	CLC078		CAL	CLC086		CAL			CAL			CAL			CAL			CAL
N	CLC068	CLC069	CLC070	B	CLC076	CLC077	CLC083	CLC084	CLC085
O	CLC074	CLC073	CLC072	CLC081	CLC080	CLC079
P		CAL			CAL			CAL			CAL			CAL			CAL			CAL			CAL

## Sheet: Batch 2
	1	2	3	4	5	6	7	8	9	10	11	12	13	14	15	16	17	18	19	20	21	22	23	24
A	CLC087	CLC099	CLC088	B	CLC089	CLC100	CLC090	CLC101	CLC091	CLC102	CLC092	CLC103	CLC093	CLC104	CLC094	CLC105	CLC095	CLC106	CLC096	CLC107	CLC097	CLC108	CLC098	CLC109
B		CAL			CAL			CAL			CAL		CLC133	CAL	CLC138	CLC144	CAL	CLC150	CLC156	CAL	CLC162		CAL
C	CLC110	CLC122	CLC111	CLC123	CLC112	CLC124	CLC113	CLC125	CLC114	CLC126	CLC115	CLC127	CLC116	CLC128	CLC117	CLC129	CLC118	CLC130	CLC119	CLC131	CLC120	CLC132	CLC121	B	MTP 384 ground steel
D	CLC087	CLC099	CLC088	B	CLC089	CLC100	CLC090	CLC101	CLC091	CLC102	CLC092	CLC103	CLC093	CLC104	CLC094	CLC105	CLC095	CLC106	CLC096	CLC107	CLC097	CLC108	CLC098	CLC109	ID210 1004770
E		CAL			CAL			CAL			CAL		B	CAL	CLC139	CLC145	CAL	CLC151	CLC157	CAL	CLC162		CAL
F	CLC110	CLC122	CLC111	CLC123	CLC112	CLC124	CLC113	CLC125	CLC114	CLC126	CLC115	CLC127	CLC116	CLC128	CLC117	CLC129	CLC118	CLC130	CLC119	CLC131	CLC120	CLC132	CLC121	B
G	CLC087	CLC099	CLC088	B	CLC089	CLC100	CLC090	CLC101	CLC091	CLC102	CLC092	CLC103	CLC093	CLC104	CLC094	CLC105	CLC095	CLC106	CLC096	CLC107	CLC097	CLC108	CLC098	CLC109
H		CAL			CAL			CAL			CAL		CLC134	CAL	CLC140	CLC146	CAL	CLC152	CLC158	CAL	CLC164		CAL
I	CLC110	CLC122	CLC111	CLC123	CLC112	CLC124	CLC113	CLC125	CLC114	CLC126	CLC115	CLC127	CLC116	CLC128	CLC117	CLC129	CLC118	CLC130	CLC119	CLC131	CLC120	CLC132	CLC121	B
J	CLC133	CLC144	B	CLC145	CLC134	CLC146	CLC135	CLC147	CLC136	CLC148	CLC137	CLC149	CLC138	CLC150	CLC139	CLC151	CLC140	CLC152	CLC141	CLC153	CLC142	CLC154	CLC143	CLC155
K		CAL			CAL			CAL			CAL		CLC135	CAL	CLC141	CLC147	CAL	CLC153	CLC159	CAL	CLC165		CAL
L	CLC156		CLC157		CLC158		CLC159		CLC160		CLC161		CLC162		CLC162		CLC164		CLC165		CLC166		B
M	CLC133	CLC144	B	CLC145	CLC134	CLC146	CLC135	CLC147	CLC136	CLC148	CLC137	CLC149	CLC138	CLC150	CLC139	CLC151	CLC140	CLC152	CLC141	CLC153	CLC142	CLC154	CLC143	CLC155
N		CAL			CAL			CAL			CAL		CLC136	CAL	CLC142	CLC148	CAL	CLC154	CLC160	CAL	CLC166		CAL
O	CLC156		CLC157		CLC158		CLC159		CLC160		CLC161		CLC162		CLC162		CLC164		CLC165		CLC166		B
P		CAL			CAL			CAL			CAL		CLC137	CAL	CLC143	CLC149	CAL	CLC155	CLC161	CAL	B		CAL
	diluted 1:10

## Sheet: Batch 3
	1	2	3	4	5	6	7	8	9	10	11	12	13	14	15	16	17	18	19	20	21	22	23	24
A	CLC167	CLC179	CLC168	CLC180	CLC169	CLC181	CLC170	CLC182	CLC171	CLC183	CLC172	CLC184	CLC173	CLC185	CLC174	CLC186	CLC175	CLC187	CLC176	CLC188	CLC177	CLC189	CLC178	B
B		CAL		CLC213	CAL	CLC220		CAL		B	CAL	CLC231		CAL		CLC237	CAL	CLC243		CAL		CLC249	CAL	CLC255			CAL respot undiluted
C	CLC190	CLC202	CLC191	B	CLC192	CLC203	CLC193	CLC204	CLC194	CLC205	CLC195	CLC206	CLC196	CLC207	CLC197	CLC208	CLC198	CLC209	CLC199	CLC210	CLC200	CLC211	CLC201	CLC212	MTP 384 ground steel		Spotting error - sample ontop of cal
D	CLC167	CLC179	CLC168	CLC180	CLC169	CLC181	CLC170	CLC182	CLC171	CLC183	CLC172	CLC184	CLC173	CLC185	CLC174	CLC186	CLC175	CLC187	CLC176	CLC188	CLC177	CLC189	CLC178	CLC109	ID210 1004770
E	CLC214	CAL	CLC221	CLC226	CAL	CLC232	CLC238	CAL	CLC244	CLC250	CAL	CLC256		CAL			CAL			CAL			CAL
F	CLC190	CLC202	CLC191	B	CLC192	CLC203	CLC193	CLC204	CLC194	CLC205	CLC195	CLC206	CLC196	CLC207	CLC197	CLC208	CLC198	CLC209	CLC199	CLC210	CLC200	CLC211	CLC201	B
G	CLC167	CLC179	CLC168	CLC180	CLC169	CLC181	CLC170	CLC182	CLC171	CLC183	CLC172	CLC184	CLC173	CLC185	CLC174	CLC186	CLC175	CLC187	CLC176	CLC188	CLC177	CLC189	CLC178	CLC109
H	CLC215	CAL	CLC222	CLC227	CAL	CLC233	CLC239	CAL	CLC245	CLC251	CAL	CLC257		CAL			CAL			CAL			CAL
I	CLC190	CLC202	CLC191	B	CLC192	CLC203	CLC193	CLC204	CLC194	CLC205	CLC195	CLC206	CLC196	CLC207	CLC197	CLC208	CLC198	CLC209	CLC199	CLC210	CLC200	CLC211	CLC201	B
J	CLC213	B	CLC214	CLC226	CLC215	CLC227	CLC216	CLC228	CLC217	CLC229	CLC218	CLC230	CLC220	CLC231	CLC221	CLC232	CLC222	CLC233	CLC223	CLC234	CLC224	CLC235	CLC225	CLC236
K	CLC216	CAL	CLC223	CLC228	CAL	CLC234	CLC240	CAL	CLC246	CLC252	CAL	CLC258		CAL			CAL			CAL			CAL
L	CLC237	CLC249	CLC238	CLC250	CLC239	CLC251	CLC240	CLC252	CLC241	CLC253	CLC242	CLC254	CLC243	CLC255	CLC244	CLC256	CLC245	CLC257	CLC246	CLC258	CLC247	CLC259	CLC248	B
M	CLC213	B	CLC214	CLC226	CLC215	CLC227	CLC216	CLC228	CLC217	CLC229	CLC218	CLC230	CLC220	CLC231	CLC221	CLC232	CLC222	CLC233	CLC223	CLC234	CLC224	CLC235	CLC225	CLC236
N	CLC217	CAL	CLC224	CLC229	CAL	CLC235	CLC241	CAL	CLC247	CLC253	CAL	CLC259		CAL			CAL			CAL			CAL
O	CLC237	CLC249	CLC238	CLC250	CLC239	CLC251	CLC240	CLC252	CLC241	CLC253	CLC242	CLC254	CLC243	CLC255	CLC244	CLC256	CLC245	CLC257	CLC246	CLC258	CLC247	CLC259	CLC248	B
P	CLC218	CAL	CLC225	CLC230	CAL	CLC236	CLC242	CAL	CLC248	CLC254	CAL	B		CAL			CAL			CAL			CAL
		samples diluted 1:10
						Calibrants error - dilution - poor peaks

## Sheet: Batch 4
	1	2	3	4	5	6	7	8	9	10	11	12	13	14	15	16	17	18	19	20	21	22	23	24
A	CLC219	CLC271	CLC260	CLC272	CLC261	CLC273	CLC262	CLC274	CLC263	CLC275	CLC264	CLC276	CLC265	CLC277	CLC266	CLC278	CLC267	CLC279	CLC268	CLC280	CLC269	CLC281	CLC270	B
B	CLC305	CAL	CLC311	B	CAL	CLC322		CAL			CAL		CLC219	CAL	CLC260	CLC261	CAL	CLC262	CLC263	CAL	CLC264		CAL
C	CLC282	CLC294	CLC283	CLC295	CLC284	CLC296	CLC285	CLC297	CLC286	CLC298	CLC287	CLC299	CLC288	CLC300	CLC289	CLC301	CLC290	CLC302	CLC291	CLC303	CLC292	CLC304	CLC293	B	MTP 384 ground steel
D	CLC219	CLC271	CLC260	CLC272	CLC261	CLC273	CLC262	CLC274	CLC263	CLC275	CLC264	CLC276	CLC265	CLC277	CLC266	CLC278	CLC267	CLC279	CLC268	CLC280	CLC269	CLC281	CLC270	B	ID210 1004770
E	CLC306	CAL	CLC312	CLC317	CAL	CLC323		CAL			CAL		CLC265	CAL	CLC266	CLC267	CAL	CLC268	CLC269	CAL	CLC270		CAL
F	CLC282	CLC294	CLC283	CLC295	CLC284	CLC296	CLC285	CLC297	CLC286	CLC298	CLC287	CLC299	CLC288	CLC300	CLC289	CLC301	CLC290	CLC302	CLC291	CLC303	CLC292	CLC304	CLC293	B
G	CLC219	CLC271	CLC260	CLC272	CLC261	CLC273	CLC262	CLC274	CLC263	CLC275	CLC264	CLC276	CLC265	CLC277	CLC266	CLC278	CLC267	CLC279	CLC268	CLC280	CLC269	CLC281	CLC270	B	Mixing on spot
H	CLC307	CAL	CLC313	CLC318	CAL	CLC324		CAL			CAL			CAL			CAL			CAL			CAL
I	CLC282	CLC294	CLC283	CLC295	CLC284	CLC296	CLC285	CLC297	CLC286	CLC298	CLC287	CLC299	CLC288	CLC300	CLC289	CLC301	CLC290	CLC302	CLC303	CLC291	CLC292	CLC304	CLC293	B
J	CLC305	B	CLC306	CLC317	CLC307	CLC318	CLC308	CLC319	CLC309	CLC320	CLC310	CLC321	CLC311	CLC322	CLC312	CLC323	CLC313	CLC324	CLC314	CLC325	CLC315	CLC326	CLC316	B
K	CLC308	CAL	CLC314	CLC319	CAL	CLC325		CAL			CAL			CAL			CAL			CAL			CAL
L
M	CLC305	B	CLC306	CLC317	CLC307	CLC318	CLC308	CLC319	CLC309	CLC320	CLC310	CLC321	CLC311	CLC322	CLC312	CLC323	CLC313	CLC324	CLC314	CLC325	CLC315	CLC326	CLC316	B
N	CLC309	CAL	CLC315	CLC320	CAL	CLC326		CAL			CAL			CAL			CAL			CAL			CAL
O
P	CLC310	CAL	CLC316	CLC321	CAL	B		CAL			CAL			CAL			CAL			CAL			CAL
		samples diluted 1:10

## Sheet: Batch 5
	1	2	3	4	5	6	7	8	9	10	11	12	13	14	15	16	17	18	19	20	21	22	23	24
A	CLC01	CLC330.1	CLC02	CLC330.2	CLC03	CLC330.3	CLC04	CLC330.4	CLC05	CLC330.5	CLC06	CLC330.6	CLC327.1	CLC330.7	CLC327.2	CLC331.1	CLC328	CLC331.2	CLC329.1	CLC331.3	CLC329.2	CLC331.4	B	CLC331.5
B	B	CAL	CLC334.5	CLC335.4	CAL	CLC336.4	CLC337.2	CAL	CLC337.8	B	CAL			CAL			CAL			CAL			CAL
C	CLC331.6	CLC332.5	CLC331.7	CLC332.6	CLC331.8	CLC332.7	CLC331.9	CLC332.8	CLC331.10	CLC332.9	CLC331.11	CLC332.10	CLC331.12	CLC332.11	CLC331.13	CLC333.1	CLC332.1	CLC333.2	CLC332.2	CLC333.3	CLC332.3	CLC333.4	CLC332.4	B	MTP 384 ground steel
D	CLC01	CLC330.1	CLC02	CLC330.2	CLC03	CLC330.3	CLC04	CLC330.4	CLC05	CLC330.5	CLC06	CLC330.6	CLC327.1	CLC330.7	CLC327.2	CLC331.1	CLC328	CLC331.2	CLC329.1	CLC331.3	CLC329.2	CLC331.4	B	CLC331.5	ID210 1004770
E	CLC333.5	CAL	CLC334.6	CLC335.5	CAL	CLC336.5	CLC337.3	CAL	CLC338.1	CLC339.1	CAL			CAL			CAL			CAL			CAL
F	CLC331.6	CLC332.5	CLC331.7	CLC332.6	CLC331.8	CLC332.7	CLC331.9	CLC332.8	CLC331.10	CLC332.9	CLC331.11	CLC332.10	CLC331.12	CLC332.11	CLC331.13	CLC333.1	CLC332.1	CLC333.2	CLC332.2	CLC333.3	CLC332.3	CLC333.4	CLC332.4	B
G	CLC01	CLC330.1	CLC02	CLC330.2	CLC03	CLC330.3	CLC04	CLC330.4	CLC05	CLC330.5	CLC06	CLC330.6	CLC327.1	CLC330.7	CLC327.2	CLC331.1	CLC328	CLC331.2	CLC329.1	CLC331.3	CLC329.2	CLC331.4	B	CLC331.5	Mixing on spot
H	CLC334.1	CAL	CLC334.7	CLC335.6	CAL	CLC336.6	CLC337.4	CAL	CLC338.2	CLC339.2	CAL			CAL			CAL			CAL			CAL
I	CLC331.6	CLC332.5	CLC331.7	CLC332.6	CLC331.8	CLC332.7	CLC331.9	CLC332.8	CLC331.10	CLC332.9	CLC331.11	CLC332.10	CLC331.12	CLC332.11	CLC331.13	CLC333.1	CLC332.1	CLC333.2	CLC332.2	CLC333.3	CLC332.3	CLC333.4	CLC332.4	B
J	B	CLC335.4	CLC333.5	CLC335.5	CLC334.1	CLC335.6	CLC334.2	CLC336.1	CLC334.3	CLC336.2	CLC334.4	CLC336.3	CLC334.5	CLC336.4	CLC334.6	CLC336.5	CLC334.7	CLC336.6	CLC335.1	CLC336.7	CLC335.2	CLC336.8	CLC335.3	CLC337.1
K	CLC334.2	CAL	CLC335.1	CLC336.1	CAL	CLC336.7	CLC337.5	CAL	CLC338.3	CLC339.3	CAL			CAL			CAL			CAL			CAL
L	CLC337.2	B	CLC337.3	CLC339.1	CLC337.4	CLC339.2	CLC337.5	CLC339.3	CLC337.6		CLC337.7		CLC337.8		CLC338.1		CLC338.2		CLC338.3		CLC338.4		CLC338.5
M	B	CLC335.4	CLC333.5	CLC335.5	CLC334.1	CLC335.6	CLC334.2	CLC336.1	CLC334.3	CLC336.2	CLC334.4	CLC336.3	CLC334.5	CLC336.4	CLC334.6	CLC336.5	CLC334.7	CLC336.6	CLC335.1	CLC336.7	CLC335.2	CLC336.8	CLC335.3	CLC337.1
N	CLC334.3	CAL	CLC335.2	CLC336.2	CAL	CLC336.8	CLC337.6	CAL	CLC338.4		CAL			CAL			CAL			CAL			CAL
O	CLC337.2	B	CLC337.3	CLC339.1	CLC337.4	CLC339.2	CLC337.5	CLC339.3	CLC337.6		CLC337.7		CLC337.8		CLC338.1		CLC338.2		CLC338.3		CLC338.4		CLC338.5
P	CLC334.4	CAL	CLC335.3	CLC336.3	CAL	CLC337.1	CLC337.7	CAL	CLC338.5		CAL			CAL			CAL			CAL			CAL
		samples diluted 1:10

## Sheet: Batch 6
	1	2	3	4	5	6	7	8	9	10	11	12	13	14	15	16	17	18	19	20	21	22	23	24
A	CLC340.1	CLC341.4	CLC340.2	CLC342.1	CLC340.3	CLC342.2	CLC340.4	CLC342.3	CLC340.5	CLC342.4	CLC340.6	CLC342.5	CLC340.7	CLC342.6	CLC340.8	CLC342.7	CLC341.1	CLC342.8	CLC341.2	CLC343.1	CLC341.3	CLC343.2	B	CLC343.3	Diluted 1:10
B		CAL			CAL			CAL			CAL			CAL			CAL			CAL			CAL
C	CLC343.4		CLC343.5		CLC343.6		CLC343.7		CLC344.1		CLC344.2		CLC344.3		CLC344.4		CLC339.4		CLC339.5		B		B		MTP 384 ground steel
D	CLC340.1	CLC341.4	CLC340.2	CLC342.1	CLC340.3	CLC342.2	CLC340.4	CLC342.3	CLC340.5	CLC342.4	CLC340.6	CLC342.5	CLC340.7	CLC342.6	CLC340.8	CLC342.7	CLC341.1	CLC342.8	CLC341.2	CLC343.1	CLC341.3	CLC343.2	B	CLC343.3	ID210 1004770
E		CAL			CAL			CAL			CAL			CAL			CAL			CAL			CAL
F	CLC343.4		CLC343.5		CLC343.6		CLC343.7		CLC344.1		CLC344.2		CLC344.3		CLC344.4		CLC339.4		CLC339.5		B		B
G	CLC340.1	CLC341.4	CLC340.2	CLC342.1	CLC340.3	CLC342.2	CLC340.4	CLC342.3	CLC340.5	CLC342.4	CLC340.6	CLC342.5	CLC340.7	CLC342.6	CLC340.8	CLC342.7	CLC341.1	CLC342.8	CLC341.2	CLC343.1	CLC341.3	CLC343.2	B	CLC343.3
H		CAL			CAL			CAL			CAL			CAL			CAL			CAL			CAL
I	CLC343.4		CLC343.5		CLC343.6		CLC343.7		CLC344.1		CLC344.2		CLC344.3		CLC344.4		CLC339.4		CLC339.5		B		B
J
K		CAL			CAL			CAL			CAL			CAL			CAL			CAL			CAL
L
M
N		CAL			CAL			CAL			CAL			CAL			CAL			CAL			CAL
O
P		CAL			CAL			CAL			CAL			CAL			CAL			CAL			CAL
		samples diluted 1:10

## Sheet: Batch 7
	1	2	3	4	5	6	7	8	9	10	11	12	13	14	15	16	17	18	19	20	21	22	23	24
A	CLC346.1	CLC348.3	CLC346.2	CLC348.4	CLC346.3	CLC348.5	CLC346.4	CLC348.6	CLC346.5	CLC349.1	CLC347.1	CLC349.2	CLC347.2	CLC349.3	CLC347.3	CLC349.4	CLC347.4	CLC349.5	CLC347.5	CLC350.1	CLC348.1	CLC350.2	CLC348.2	B	Diluted 1:10
B		CAL			CAL			CAL			CAL			CAL			CAL			CAL			CAL
C	CLC350.3	CLC352.2	CLC350.4	CLC352.3	CLC350.5	CLC352.4	CLC350.6	CLC352.5	CLC350.7	CLC352.6	CLC350.8	CLC353.1	CLC351.1	CLC353.2	CLC351.2	CLC353.3	CLC351.3	CLC353.4	CLC351.4	CLC353.5	CLC351.5	CLC354.1	CLC352.1	B	MTP 384 ground steel
D	CLC346.1	CLC348.3	CLC346.2	CLC348.4	CLC346.3	CLC348.5	CLC346.4	CLC348.6	CLC346.5	CLC349.1	CLC347.1	CLC349.2	CLC347.2	CLC349.3	CLC347.3	CLC349.4	CLC347.4	CLC349.5	CLC347.5	CLC350.1	CLC348.1	CLC350.2	CLC348.2	B	ID210 1004770
E		CAL			CAL			CAL			CAL			CAL			CAL			CAL			CAL
F	CLC350.3	CLC352.2	CLC350.4	CLC352.3	CLC350.5	CLC352.4	CLC350.6	CLC352.5	CLC350.7	CLC352.6	CLC350.8	CLC353.1	CLC351.1	CLC353.2	CLC351.2	CLC353.3	CLC351.3	CLC353.4	CLC351.4	CLC353.5	CLC351.5	CLC354.1	CLC352.1	B
G	CLC346.1	CLC348.3	CLC346.2	CLC348.4	CLC346.3	CLC348.5	CLC346.4	CLC348.6	CLC346.5	CLC349.1	CLC347.1	CLC349.2	CLC347.2	CLC349.3	CLC347.3	CLC349.4	CLC347.4	CLC349.5	CLC347.5	CLC350.1	CLC348.1	CLC350.2	CLC348.2	B
H		CAL			CAL			CAL			CAL			CAL			CAL			CAL			CAL
I	CLC350.3	CLC352.2	CLC350.4	CLC352.3	CLC350.5	CLC352.4	CLC350.6	CLC352.5	CLC350.7	CLC352.6	CLC350.8	CLC353.1	CLC351.1	CLC353.2	CLC351.2	CLC353.3	CLC351.3	CLC353.4	CLC351.4	CLC353.5	CLC351.5	CLC354.1	CLC352.1	B
J	CLC354.2	CLC356.3	CLC354.3	CLC356.4	CLC354.4	CLC356.5	CLC354.5	CLC356.6	CLC355.1	CLC357.1	CLC355.2	CLC357.2	CLC355.3	CLC357.3	CLC355.4	CLC357.4	CLC355.5	CLC357.5	CLC356.1	CLC358.1	CLC356.2	CLC358.2	B	CLC358.3
K		CAL			CAL			CAL			CAL			CAL			CAL			CAL			CAL
L	CLC358.4	CLC361.1	CLC358.5	CLC361.2	CLC359.1	CLC361.3	CLC359.2	CLC361.4	CLC359.3	CLC361.5	CLC359.4	CLC362.1	CLC360.1	CLC362.2	CLC360.2	CLC362.3	CLC360.3	CLC362.4	CLC360.4	B	CLC360.5		B
M	CLC354.2	CLC356.3	CLC354.3	CLC356.4	CLC354.4	CLC356.5	CLC354.5	CLC356.6	CLC355.1	CLC357.1	CLC355.2	CLC357.2	CLC355.3	CLC357.3	CLC355.4	CLC357.4	CLC355.5	CLC357.5	CLC356.1	CLC358.1	CLC356.2	CLC358.2	B	CLC358.3
N		CAL			CAL			CAL			CAL			CAL			CAL			CAL			CAL
O	CLC358.4	CLC361.1	CLC358.5	CLC361.2	CLC359.1	CLC361.3	CLC359.2	CLC361.4	CLC359.3	CLC361.5	CLC359.4	CLC362.1	CLC360.1	CLC362.2	CLC360.2	CLC362.3	CLC360.3	CLC362.4	CLC360.4	B	CLC360.5		B
P		CAL			CAL			CAL			CAL			CAL			CAL			CAL			CAL
		samples diluted 1:10

## Sheet: Batch 8
	1	2	3	4	5	6	7	8	9	10	11	12	13	14	15	16	17	18	19	20	21	22	23	24
A	CLC363	CLC375	CLC364	CLC376	CLC365	CLC377	CLC366	CLC378	CLC367	CLC379	CLC368	CLC380	CLC369	CLC381	CLC370	CLC382	CLC371	CLC383	CLC372	CLC384	CLC373	CLC385	CLC374	B	Diluted 1:10
B		CAL			CAL			CAL			CAL			CAL			CAL			CAL			CAL
C	CLC386	CLC398	CLC387	CLC399	CLC388	CLC400	CLC389	CLC401	CLC390	CLC402	CLC391	CLC403	CLC392	CLC404	CLC393	CLC405	CLC394	CLC406	CLC395	CLC407	CLC396	CLC408	CLC397	B	MTP 384 ground steel
D	CLC363	CLC375	CLC364	CLC376	CLC365	CLC377	CLC366	CLC378	CLC367	CLC379	CLC368	CLC380	CLC369	CLC381	CLC370	CLC382	CLC371	CLC383	CLC372	CLC384	CLC373	CLC385	CLC374	B	ID210 1004770
E		CAL			CAL			CAL			CAL			CAL			CAL			CAL			CAL
F	CLC386	CLC398	CLC387	CLC399	CLC388	CLC400	CLC389	CLC401	CLC390	CLC402	CLC391	CLC403	CLC392	CLC404	CLC393	CLC405	CLC394	CLC406	CLC395	CLC407	CLC396	CLC408	CLC397	B
G	CLC363	CLC375	CLC364	CLC376	CLC365	CLC377	CLC366	CLC378	CLC367	CLC379	CLC368	CLC380	CLC369	CLC381	CLC370	CLC382	CLC371	CLC383	CLC372	CLC384	CLC373	CLC385	CLC374	B
H		CAL			CAL			CAL			CAL			CAL			CAL			CAL			CAL
I	CLC386	CLC398	CLC387	CLC399	CLC388	CLC400	CLC389	CLC401	CLC390	CLC402	CLC391	CLC403	CLC392	CLC404	CLC393	CLC405	CLC394	CLC406	CLC395	CLC407	CLC396	CLC408	CLC397	B
J	CLC409	CLC421	CLC410	CLC422	CLC411	CLC423	CLC412	CLC424	CLC413	CLC425	CLC414	CLC426	CLC415	CLC427	CLC416	CLC428	CLC417	CLC429	CLC418	CLC430	CLC419	CLC431	CLC420	B
K		CAL			CAL			CAL			CAL			CAL			CAL			CAL			CAL
L	CLC432	CLC541	CLC433	CLC542	CLC434	CLC543	CLC435	CLC544	CLC436	CLC545	CLC437	CLC546	CLC438	CLC547	CLC439	CLC548	CLC440	CLC549	CLC441	CLC550	CLC442	CLC551	CLC540	B
M	CLC409	CLC421	CLC410	CLC422	CLC411	CLC423	CLC412	CLC424	CLC413	CLC425	CLC414	CLC426	CLC415	CLC427	CLC416	CLC428	CLC417	CLC429	CLC418	CLC430	CLC419	CLC431	CLC420	B
N		CAL			CAL			CAL			CAL			CAL			CAL			CAL			CAL
O	CLC432	CLC541	CLC433	CLC542	CLC434	CLC543	CLC435	CLC544	CLC436	CLC545	CLC437	CLC546	CLC438	CLC547	CLC439	CLC548	CLC440	CLC549	CLC441	CLC550	CLC442	CLC551	CLC540	B
P		CAL			CAL			CAL			CAL			CAL			CAL			CAL			CAL
		samples diluted 1:10

## Sheet: Batch 9
	1	2	3	4	5	6	7	8	9	10	11	12	13	14	15	16	17	18	19	20	21	22	23	24
A	CLC443	CLC455	CLC444	CLC456	CLC445	CLC457	CLC446	CLC458	CLC447	CLC459	CLC448	CLC460	CLC449	CLC461	CLC450	CLC462	CLC451	CLC463	CLC452	CLC464	CLC453	CLC465	CLC454	B
B		CAL			CAL			CAL			CAL			CAL			CAL			CAL			CAL
C	CLC466	CLC478	CLC467	CLC479	CLC468	CLC480	CLC469	CLC481	CLC470	CLC482	CLC471	CLC483	CLC472	CLC484	CLC473	CLC485	CLC474	CLC486	CLC475	CLC487	CLC476	CLC488	CLC477	B	MTP 384 ground steel
D	CLC443	CLC455	CLC444	CLC456	CLC445	CLC457	CLC446	CLC458	CLC447	CLC459	CLC448	CLC460	CLC449	CLC461	CLC450	CLC462	CLC451	CLC463	CLC452	CLC464	CLC453	CLC465	CLC454	B
E		CAL			CAL			CAL			CAL			CAL			CAL			CAL			CAL
F	CLC466	CLC478	CLC467	CLC479	CLC468	CLC480	CLC469	CLC481	CLC470	CLC482	CLC471	CLC483	CLC472	CLC484	CLC473	CLC485	CLC474	CLC486	CLC475	CLC487	CLC476	CLC488	CLC477	B
G	CLC443	CLC455	CLC444	CLC456	CLC445	CLC457	CLC446	CLC458	CLC447	CLC459	CLC448	CLC460	CLC449	CLC461	CLC450	CLC462	CLC451	CLC463	CLC452	CLC464	CLC453	CLC465	CLC454	B
H		CAL			CAL			CAL			CAL			CAL			CAL			CAL			CAL
I	CLC466	CLC478	CLC467	CLC479	CLC468	CLC480	CLC469	CLC481	CLC470	CLC482	CLC471	CLC483	CLC472	CLC484	CLC473	CLC485	CLC474	CLC486	CLC475	CLC487	CLC476	CLC488	CLC477	B
J	CLC489	CLC501	CLC490	CLC502	CLC491	CLC503	CLC492	CLC504	CLC493	CLC505	CLC494	CLC506	CLC495	CLC507	CLC496	CLC508	CLC497	CLC509	CLC498	CLC510	CLC499	CLC511	CLC500	B
K		CAL			CAL			CAL			CAL			CAL			CAL			CAL			CAL
L	CLC512	CLC524	CLC513	CLC525	CLC514	CLC526	CLC515	CLC527	CLC516	CLC528	CLC517	CLC529	CLC518	CLC530	CLC519	CLC531	CLC520	CLC532	CLC521	CLC533	CLC522	CLC534	CLC523	B
M	CLC489	CLC501	CLC490	CLC502	CLC491	CLC503	CLC492	CLC504	CLC493	CLC505	CLC494	CLC506	CLC495	CLC507	CLC496	CLC508	CLC497	CLC509	CLC498	CLC510	CLC499	CLC511	CLC500	B
N		CAL			CAL			CAL			CAL			CAL			CAL			CAL			CAL
O	CLC512	CLC524	CLC513	CLC525	CLC514	CLC526	CLC515	CLC527	CLC516	CLC528	CLC517	CLC529	CLC518	CLC530	CLC519	CLC531	CLC520	CLC532	CLC521	CLC533	CLC522	CLC534	CLC523	B
P		CAL			CAL			CAL			CAL			CAL			CAL			CAL			CAL
		samples diluted 1:10

## Sheet: Batch 10
	1	2	3	4	5	6	7	8	9	10	11	12	13	14	15	16	17	18	19	20	21	22	23	24
A	CLC535	CLC559	CLC536	CLC560	CLC537	CLC561	CLC538	CLC562	CLC539	CLC563	CLC552	CLC564	CLC553	CLC565	CLC554	CLC566	CLC555	CLC567	CLC556	CLC568	CLC557	CLC569	CLC558	B	Diluted 1:10
B		CAL			CAL			CAL			CAL			CAL			CAL			CAL			CAL
C	CLC570	CLC582	CLC571	CLC583	CLC572	CLC584	CLC573	CLC585	CLC574	CLC586	CLC575	CLC587	CLC576	CLC588	CLC577	CLC589	CLC578	CLC590	CLC579	CLC591	CLC580	CLC592		B	MTP 384 ground steel
D	CLC535	CLC559	CLC536	CLC560	CLC537	CLC561	CLC538	CLC562	CLC539	CLC563	CLC552	CLC564	CLC553	CLC565	CLC554	CLC566	CLC555	CLC567	CLC556	CLC568	CLC557	CLC569	CLC558	B	ID210 1004770
E		CAL			CAL			CAL			CAL			CAL			CAL			CAL			CAL
F	CLC570	CLC582	CLC571	CLC583	CLC572	CLC584	CLC573	CLC585	CLC574	CLC586	CLC575	CLC587	CLC576	CLC588	CLC577	CLC589	CLC578	CLC590	CLC579	CLC591	CLC580	CLC592		B
G	CLC535	CLC559	CLC536	CLC560	CLC537	CLC561	CLC538	CLC562	CLC539	CLC563	CLC552	CLC564	CLC553	CLC565	CLC554	CLC566	CLC555	CLC567	CLC556	CLC568	CLC557	CLC569	CLC558	B
H		CAL			CAL			CAL			CAL			CAL			CAL			CAL			CAL
I	CLC570	CLC582	CLC571	CLC583	CLC572	CLC584	CLC573	CLC585	CLC574	CLC586	CLC575	CLC587	CLC576	CLC588	CLC577	CLC589	CLC578	CLC590	CLC579	CLC591	CLC580	CLC592		B
J	CLC593	CLC605	CLC594	CLC606	CLC595	CLC607	CLC596	CLC608	CLC597	CLC609	CLC598	CLC610	CLC599	CLC611	CLC600	CLC612	CLC601	CLC613	CLC602	CLC614	CLC603	CLC615	CLC604	B
K		CAL			CAL			CAL			CAL			CAL			CAL			CAL			CAL
L	CLC616	CLC628	CLC617	CLC629	CLC618	CLC630	CLC619	CLC631	CLC620	CLC632	CLC621	CLC633	CLC622	CLC634	CLC623	CLC635	CLC624	CLC636	CLC625	CLC637	CLC626	B	CLC627	CLC581
M	CLC593	CLC605	CLC594	CLC606	CLC595	CLC607	CLC596	CLC608	CLC597	CLC609	CLC598	CLC610	CLC599	CLC611	CLC600	CLC612	CLC601	CLC613	CLC602	CLC614	CLC603	CLC615	CLC604	B
N		CAL			CAL			CAL			CAL			CAL			CAL			CAL			CAL
O	CLC616	CLC628	CLC617	CLC629	CLC618	CLC630	CLC619	CLC631	CLC620	CLC632	CLC621	CLC633	CLC622	CLC634	CLC623	CLC635	CLC624	CLC636	CLC625	CLC637	CLC626	B	CLC627	CLC581
P		CAL			CAL			CAL			CAL			CAL			CAL			CAL			CAL
		samples diluted 1:10

[truncated: 2 more sheets: Batch 11, Batch 12]
