# Supplementary material for: New insights from the application of ZooMS to Late Pleistocene fauna from Grotta di Castelcivita, southern Italy
Source: Sci Rep. 2025 Jul 17;15:25906. doi: 10.1038/s41598-025-11355-6 (PMC12267457; doi:10.1038/s41598-025-11355-6)
Supplement: Supplementary file 2 — Supplementary Material 2 [file 41598_2025_11355_MOESM2_ESM.xlsx]

## Sheet: Sheet1
					COL1ɑ1 508 - 519	COL1ɑ2 978 - 990	COL1ɑ2 978 - 990	COL1ɑ2 484 - 498	COL1ɑ2 502 - 519	COL1ɑ2 292 - 309	COL1ɑ2 793 - 816	COL1ɑ2 454 - 483	COL1ɑ1 586 - 618	COL1ɑ1 586 - 618	COL1ɑ2 757 - 789	COL1ɑ2 757 - 789
ZooMS Category	Family	Common Name	Species/Genus	Order	P1	A	A'	B	C	P2	D	E	F	F'	G	G'
Equus	Horse	Asinus	Equus asinus	Perissodactyla	1105.6	1182.6	1198.6	1427.7	1550.8	1649.8	2145.1	2820.4	2883.4	2899.4	2983.5	2999.5
	Horse	Horse	Equus caballus	Perissodactyla	1105.6	1182.6	1198.6	1427.7	1550.8	1649.8	2145.1	2820.4	2883.4	2899.4	2983.5	2999.5
	Horse	European ass	Equus hydruntinus	Perissodactyla	1105.6	1182.6	1198.6	1427.7	1550.8	1649.8	2145.1	2820.4	2883.4	2899.4	2983.5	2999.5
	Horse	Przewalski's horse	Equus przewalskii	Perissodactyla	1105.6	1182.6	1198.6	1427.7	1550.8	1649.8	2145.1	2820.4	2883.4	2899.4	2983.5	2999.5
Cervid	Deer	Fallow deer	Dama dama	Artiodactyla	1105.6	1180.6	1196.6	1427.7	1550.8	1648.8	2131.1	2792.3	2883.4	2899.4	3017.5	3033.5
	Deer	Red Deer	Cervus elaphus	Artiodactyla	1105.6	1180.6	1196.6	1427.7	1550.8	1648.8	2131.1	2792.3	2883.4	2899.4	3017.5	3033.5
	Deer	Irish elk	Megaloceros giganteus	Artiodactyla	1105.6	1180.6	1196.6	1427.7	1550.8	1648.8	2131.1	2792.3	2883.4	2899.4	3017.5	3033.5
Capreolus capreolus	Deer	Roe deer	Capreolus capreolus	Artiodactyla	1105.6	1180.6	1196.6	1427.7	1550.8	1648.8	2131.1	2792.3	2883.4	2899.4	3043.4	3059.4
Cervid/Rupicapra	Saiga	Chamois	Rupicapra rupicapra	Artiodactyla	1105.6	1180.6	1196.6	1427.7	1580.8	1648.8	2131.1	2792.3	2883.4	2899.4	3017.5	3033.5
	Deer	Fallow deer	Dama dama	Artiodactyla	1105.6	1180.6	1196.6	1427.7	1550.8	1648.8	2131.1	2792.3	2883.4	2899.4	3017.5	3033.5
	Deer	Irish elk	Megaloceros giganteus	Artiodactyla	1105.6	1180.6	1196.6	1427.7	1550.8	1648.8	2131.1	2792.3	2883.4	2899.4	3017.5	3033.5
	Deer	Red Deer	Cervus elaphus	Artiodactyla	1105.6	1180.6	1196.6	1427.7	1550.8	1648.8	2131.1	2792.3	2883.4	2899.4	3017.5	3033.5
Bos/Bison	Cow	Auroch	Bos primigenius	Artiodactyla	1105.6	1192.7	1208.7	1427.7	1580.8	1648.8	2131.1	2792.3	2853.4	2869.4	3017.5	3033.5
	Cow	Cattle	Bos taurus	Artiodactyla	1105.6	1192.7	1208.7	1427.7	1580.8	1648.8	2131.1	2792.3	2853.5	2869.5	3017.4	3033.4
	Cow	American bison	Bison bison	Artiodactyla	1105.6	1192.7	1208.7	1427.7	1580.8	1648.8	2131.1	2792.3	2853.4	2869.4	3017.5	3033.5
Capra sp.	Goat	Alpine ibex	Capra ibex	Artiodactyla	1105.6	1180.6	1196.6	1427.7	1580.8	1648.8	2131.1	2792.3	2883.4	2899.4	3077.5	3093.5
Rupicapra sp.	Saiga	Chamois	Rupicapra rupicapra	Artiodactyla	1105.6	1180.6	1196.6	1427.7	1580.8	1648.8	2131.1	2792.3	2883.4	2899.4	3017.5	3033.5
Rhinoceros	Rhino	Woolly rhinocerous	Coelodonta antiquitatis	Perissodactyla	1105.6	1182.6	1198.6	1453.7	1550.8	1623.8	2145.1		2869.4	2885.4	2983.5	2999.5
Unidentified Cervid	Deer	Fallow deer	Dama dama	Artiodactyla	1105.6	1180.6	1196.6	1427.7	1550.8	1648.8	2131.1	2792.3	2883.4	2899.4	3017.5	3033.5
	Deer	Red Deer	Cervus elaphus	Artiodactyla	1105.6	1180.6	1196.6	1427.7	1550.8	1648.8	2131.1	2792.3	2883.4	2899.4	3017.5	3033.5
	Deer	Roe deer	Capreolus capreolus	Artiodactyla	1105.6	1180.6	1196.6	1427.7	1550.8	1648.8	2131.1	2792.3	2883.4	2899.4	3043.4	3059.4
	Deer	Irish elk	Megaloceros giganteus	Artiodactyla	1105.6	1180.6	1196.6	1427.7	1550.8	1648.8	2131.1	2792.3	2883.4	2899.4	3017.5	3033.5
Unidentified Caprines	Saiga	Chamois	Rupicapra rupicapra	Artiodactyla	1105.6	1180.6	1196.6	1427.7	1580.8	1648.8	2131.1	2792.3	2883.4	2899.4	3017.5	3033.5
	Goat	Goat	Capra hircus	Artiodactyla	1105.6	1180.6	1196.6	1427.7	1580.8	1648.8	2131.1	2792.3	2883.4	2899.4	3077.5	3093.5
	Goat	Alpine ibex	Capra ibex	Artiodactyla	1105.6	1180.6	1196.6	1427.7	1580.8	1648.8	2131.1	2792.3	2883.4	2899.4	3077.5	3093.5
Artiodactyla	Cow	Chamois	Rupicapra rupicapra	Artiodactyla	1105.6	1180.6	1196.6	1427.7	1580.8	1648.8	2131.1	2792.3	2883.4	2899.4	3017.5	3033.5
	Cow	Cattle	Bos taurus	Artiodactyla	1105.6	1192.7	1208.7	1427.7	1580.8	1648.8	2131.1	2792.3	2853.5	2869.5	3017.4	3033.4
	Cow	Auroch	Bos primigenius	Artiodactyla	1105.6	1192.7	1208.7	1427.7	1580.8	1648.8	2131.1	2792.3	2853.4	2869.4	3017.5	3033.5
	Cow	American bison	Bison bison	Artiodactyla	1105.6	1192.7	1208.7	1427.7	1580.8	1648.8	2131.1	2792.3	2853.4	2869.4	3017.5	3033.5
	Goat	Alpine ibex	Capra ibex	Artiodactyla	1105.6	1180.6	1196.6	1427.7	1580.8	1648.8	2131.1	2792.3	2883.4	2899.4	3077.5	3093.5
Sus sp.	Pig	Wild boar	Sus scrofa	Artiodactyla	1105.6	1180.6	1196.6	1453.7	1550.8	1647.8	2131.1	2820.4	2883.4	2899.4	3017.5	3033.5
Ursus sp.	Bear	Brown bear	Ursus arctos	Carnivora	1105.6	1217.7	1233.7	1453.7	1566.8	1609.8	2163.1		2853.4	2869.4	2957.5	2973.5
Canina	Dog	Red fox	Vulpes vulpes	Carnivora	1105.7	1210.8	1226.8	1437.7	1566.9	1649.9	2131.2	2820.5	2853.5	2869.5	2983.6	2999.6
	Dog	Gray wolf	Canis lupus	Carnivora	1105.6	1210.7	1226.7	1453.7	1566.8	1649.8	2131.1	2820.4	2853.4	2869.4	2983.5	2999.5
	Dog	Dhole	Cuon alpinus	Carnivora	1105.7	1210.8	1226.8	1453.8	1566.9		2131.2	2820.5	2853.5	2869.5	2983.6	2999.6
Felis/Lynx/Ursus	Bear	Brown bear	Ursus arctos	Carnivora	1105.6	1217.7	1233.7	1453.7	1566.8	1609.8	2163.1		2853.4	2869.4	2957.5	2973.5
	Cat	Cat	Felis catus	Carnivora	1105.6	1207.6	1223.6	1453.7	1566.8	1609.8	2163.1	2820.4	2853.4	2869.4	2983.5	2999.5
	Cat	Eurasian lynx	Lynx lynx	Carnivora	1105.6	1207.6	1223.6	1453.7	1566.8	1609.8	2163.1	2820.4	2853.4	2869.4	2983.5	2999.5
Panthera/Crocuta	Hyaena	Spotted hyaena	Crocuta crocuta	Carnivora	1105.6	1207.6	1223.6	1453.7	1566.8	1639.8	2147.1	2808.3	2853.4	2869.4	2983.5	2999.5
	Lion/Tiger	Lion	Panthera leo	Carnivora	1105.6	1207.6	1223.6	1453.7	1566.8		2147.1	2820.4	2853.4	2869.4	2983.5	2999.5
Unidentified Carnivore	Hyaena	Spotted hyaena	Crocuta crocuta	Carnivora	1105.6	1207.6	1223.6	1453.7	1566.8	1639.8	2147.1	2808.3	2853.4	2869.4	2983.5	2999.5
	Lion/Tiger	Lion	Panthera leo	Carnivora	1105.6	1207.6	1223.6	1453.7	1566.8		2147.1	2820.4	2853.4	2869.4	2983.5	2999.5
	Otter/Badger	Eurasian otter	Lutra lutra	Carnivora	1105.6	1219.7	1235.6	1453.7	1566.8		2147.1	2820.4	2853.4	2869.4	2983.5	2999.5
	Otter/Badger	European pine marten	Martes martes	Carnivora	1105.6	1219.7	1235.6	1453.7	1566.8	1609.8	2147.1	2820.4	2853.4	2869.4	2983.5	2999.5
	Otter/Badger	European badger	Meles meles	Carnivora	1105.6	1219.6	1235.6	1453.7	1566.8	1609.8	2147.1	2820.4	2853.4	2869.4	2957.4	2973.5
	Otter/Badger	European mink	Mustela lutreola	Carnivora	1105.6	1219.6	1235.6	1453.7	1566.8	1609.8	2147.1	2820.4	2853.4	2869.4	2983.5	2999.5
	Otter/Badger	European polecat	Mustela putorius	Carnivora	1105.6	1219.7	1235.6	1453.7	1566.8		2147.1	2820.4	2853.4	2869.4	2983.5	2999.5
					* Red bolded values indicate the markers with differing mass between the various species in the category. These markers are not present in the MALDI spectra and therefore a broader taxonomic identification was made.
References: Buckley et al 2009; Buckley et al 2010; Buckley, Harvey and Chamberlain 2017; Buckley and Collins 2011; Kirby et al 2013; Welker et al 2016; Jensen et al 2020
