# Supplementary material for: New insights from the application of ZooMS to Late Pleistocene fauna from Grotta di Castelcivita, southern Italy
Source: Sci Rep. 2025 Jul 17;15:25906. doi: 10.1038/s41598-025-11355-6 (PMC12267457; doi:10.1038/s41598-025-11355-6)
Supplement: Supplementary file 3 — Supplementary Material 3 [file 41598_2025_11355_MOESM3_ESM.xlsx]

## Sheet: Oertle
							COL1ɑ1 508 - 519	COL1ɑ2 978 - 990	COL1ɑ2 978 - 990	COL1ɑ2 484 - 498	COL1ɑ2 502 - 519	COL1ɑ2 292 - 309	COL1ɑ2 793 - 816	COL1ɑ2 454 - 483	COL1ɑ1 586 - 618	COL1ɑ1 586 - 618	COL1ɑ2 757 - 789	COL1ɑ2 757 - 789
Square	Layer	Spit	Cultural Layer	Plate	Sample #	ZooMS ID	P1	A	A'	B	C	P2	D	E	F	F'	G	G'
GI4II	GAR	24 UPPER LOWER	Mousterian	B5	CLC0001	Rupicapra	1105.6	1180.6	1197.6	1427.6	1580.6	1648.6	2131	2792.3	2882.8	2899	3017	3032.8
GI4II	GAR	24 UPPER LOWER	Mousterian	B5	CLC0002	Equus sp.	1105.6	1182.6	1199	1427.6	1550.6	1650.5	2145	2820	2882.9	2898	2983	2999.6
GI4II	GAR	24 UPPER LOWER	Mousterian	B5	CLC0003	Capra sp.	1105.6	1180.6	1196.5	1427.6	1580.6	1648.6	2131	2792.3	2882.8	2899	3077.2	3093
GI4II	GAR	24 UPPER LOWER	Mousterian	B5	CLC0004	Bos/Bison	1105.6	1192.6	1208.7	1427.6	1580.6	1648.6	2130.5	2792.5	2853	2868.5	3017.2	3033
GI4II	GAR	24 UPPER LOWER	Mousterian	B5	CLC0005	Capra sp.	1105.6		1197	1427.6	1580.6	1648.6	2130.5	2792	2883	2898.6		3093
GI4II	GAR	24 UPPER LOWER	Mousterian	B5	CLC0006	Capra sp.	1105.6			1427	1580.6	1648.7	2130.4	2792	2883	2898		3092.3
F12II	PIE	14 UPPER LOWER	Uluzzian	B1	CLC007	Cervid	1105.6	1180.6	1196.6	1427.7	1550.6	1648.6	2130.5	2792.8	2883	2899	3017.3	3033
F12II	PIE	14 UPPER LOWER	Uluzzian	B1	CLC008	Capreolus capreolus	1105.6	1180.6		1427.6	1550.6	1648.6	2130.5		2883	2899	3043	3059
F12II	PIE	14 UPPER LOWER	Uluzzian	B1	CLC009	Cervid	1105.6	1180.6	1196.6	1427.7	1550.6	1648.6	2130.5		2883	2898	3016.5	3033
F12II	PIE	14 UPPER LOWER	Uluzzian	B1	CLC010	Cervid	1105.6	1180.6		1427.6	1550.6	1648.6	2130.5		2883	2898.5	3018.3
F12II	PIE	14 UPPER LOWER	Uluzzian	B1	CLC011	Carnivore	1105.6			1453.6	1566.6		2146.4		2852.6	2869		2999
F12II	PIE	15 UPPER	Uluzzian	B1	CLC012	Carnivore	1105.6			1453.6	1566.6		2146.4		2852.6	2869		2999
F12II	PIE	15 UPPER	Uluzzian	B1	CLC013	Cervid	1105.6	1180.6	1197.6	1427.6	1550.6	1648.7	2130.5	2792	2883	2898	3017	3032.4
F12II	PIE	15 UPPER	Uluzzian	B1	CLC014	Cervid	1105.6	1180.6	1197.6	1427.6	1550.6	1648.6	2130.5	2792.6	2883	2898.5	3017.3
F12II	PIE	15 UPPER	Uluzzian	B1	CLC015	Cervid	1105.6	1180.6	1196.6	1427.7	1550.6	1648.6	2130.5	2792	2882.6	2898	3017.4	3032.5
G12II	PIE	12 UPPER	Uluzzian	B1	CLC016	Cervid	1105.6	1180.6	1196.6	1427.7	1550.6	1648.6	2130.5	2792	2882.6	2898	3017.4	3032.5
G12II	PIE	12 UPPER	Uluzzian	B1	CLC017	Cervid	1105.6	1180.6	1196.6	1427.7	1550.6	1648.6	2130.5	2792	2882.6	2898	3017.4	3032.5
G12II	PIE	12 UPPER	Uluzzian	B1	CLC018	Rupicapra	1105.6	1180.6	1196.6	1427.7	1580.6	1648.6	2130.5	2792	2882.6	2898	3017.4	3032.5
G13	PIE	15	Uluzzian	B1	CLC019	Cervid	1105.6	1181		1427.7	1550.6	1648.6	2130.5	2792	2882.6	2898	3017.4
G13	PIE	15	Uluzzian	B1	CLC020	Cervid	1105.6	1181	1196.7	1427.7	1550.6	1648.6	2130.5		2882.6	2898	3017.4	3032.6
G13	PIE	15	Uluzzian	B1	CLC021	Bos/Bison	1105.6	1192.6	1208.7	1427.7	1580.6	1648.6	2131	2792	2852	2868.4	3017	3032.5
G13	PIE	15	Uluzzian	B1	CLC022	Cervid	1105.6	1180.6	1197.6	1427.6	1550.6	1648.6	2130.5	2791.6	2883	2898	3017	3032.5
G13	PIE	15	Uluzzian	B1	CLC023	Cervid	1105.6	1180.6	1196.6	1427.7	1550.6	1648.6	2130.5	2792	2882.6	2898	3017.4	3032.5
G13	PIE	15	Uluzzian	B1	CLC024	Bos/Bison	1105.6	1192.6	1208.7	1427.7	1580.6	1648.6	2130.5	2792	2853	2869	3017.4	3032.5
F12II	PIE	15 LOWER	Uluzzian	B1	CLC025	Rupicapra	1105.6	1180.6	1196.6	1427.7	1580.6	1648.6	2130.5	2792	2882.6	2898	3017.4	3033
F12II	PIE	15 LOWER	Uluzzian	B1	CLC026	Capreolus capreolus	1105.6	1180.6	1196.6	1427.7	1550.6	1648.6	2131	2792	2882.6	2898	3043	3059
F12II	PIE	15 LOWER	Uluzzian	B1	CLC027	Capra sp.	1105.6		1196.6	1427.6	1580.6	1648.6	2131	2792	2883	2898		3093
F12II	PIE	15 LOWER	Uluzzian	B1	CLC028	Bos/Bison	1105.6	1192.7	1208.7	1427.6	1580.6	1648.6	2130.5	2791.6	2852.6	2868.7	3017.4	3033
F12II	PIE	15 LOWER	Uluzzian	B1	CLC029	Cervid	1105.6	1180.6	1197.6	1427.6	1550.6	1648.6	2130.5	2792	2883	2899	3017	3032.5
H13I	PIE	15 UPPER	Uluzzian	B1	CLC030	Fail
H13I	PIE	15 UPPER	Uluzzian	B1	CLC031	Fail	1105.6		1427.6
H13I	PIE	15 UPPER	Uluzzian	B1	CLC032	Cervid	1105.6	1180.6		1427.6	1550.6	1648.6	2130.5	2792.2	2882.6	2898.6	3017.3	3033
H14III	PIE	15 UPPER	Uluzzian	B1	CLC033	Cervid	1105.6	1180.6	1196.6	1427.6	1550.6	1648.6	2130.5	2792.2	2882.6	2898.6	3017.3	3033
H14III	PIE	15 UPPER	Uluzzian	B1	CLC034	Rupicapra	1105.6	1180.6	1196.6	1427.6	1580.6	1648.6	2131.9	2792	2882.6	2898.6	3017.3	3033
G13II	PIE	15 LOWER	Uluzzian	B1	CLC035	Capra sp.	1105.6	1180.6	1196.6	1427.6	1580.6	1648.6	2131.9	2792	2882.6	2898.6		3093
G13II	PIE	15 LOWER	Uluzzian	B1	CLC036	Cervid	1105.6	1180.6	1196.6	1427.6	1550.6	1648.6	2130.5		2882.6	2898.6		3033
F12II	PIE	16 UPPER	Uluzzian	B1	CLC037	Cervid	1105.6	1180.6	1197	1427.6	1550.6	1648.6	2130.5	2792.2	2882.6	2898.6	3017.3	3033
H13IV	PIE	15 LOWER	Uluzzian	B1	CLC038	Fail
H13IV	PIE	15 LOWER	Uluzzian	B1	CLC039	Fail
E12III	PIE	14 UPPER LOWER	Uluzzian	B1	CLC040	Capreolus capreolus	1105.6	1179.6	1197.6	1427.6	1550.6	1648.6	2130.5	2792	2883	2998.5	3043	3059.5
E12III	PIE	14 UPPER LOWER	Uluzzian	B1	CLC041	Bos/Bison	1105.6	1192.6	1208.7	1427.6	1580.6	1648.6	2130.5	2792	2852.7	2868.9	3017.3	3033
E12III	PIE	14 UPPER LOWER	Uluzzian	B1	CLC042	Rupicapra	1105.6	1180.6	1196.6	1427.7	1580.6	1648.6	2130.5	2792	2883	2898	3017.3	3032.5
E12III	PIE	14 UPPER LOWER	Uluzzian	B1	CLC043	Canid	1105.6	1211.6	1226.7	1453.6	1566.6		2130.5	2819.6	2852.6	2868.6	2983	2999
E12III	PIE	13 UPPER	Uluzzian	B1	CLC044	Bos/Bison	1105.6		1208.7	1427.6	1580.6	1648.6	2130.5	2792	2852.7	2868.9	3017.3	3033
E12III	PIE	13 UPPER	Uluzzian	B1	CLC045	Bos/Bison	1105.6	1192.6	1208.7	1427.6	1580.6	1648.6	2130.5	2792	2852.7	2868.9	3017.3	3033
E12III	PIE	13 UPPER	Uluzzian	B1	CLC046	Equus sp.	1105.6	1182.6	1199.8	1427	1550.6		2144.5	2820.6	2883	2899		2999
H14II	PIE	15 LOWER	Uluzzian	B1	CLC047	Fail
H14II	PIE	15 LOWER	Uluzzian	B1	CLC048	Fail
H14II	PIE	15 LOWER	Uluzzian	B1	CLC049	Cervid	1105.6	1180.6	1197.6	1427.6	1550.6	1648.6	2131.8	2792	2883	2898	3017	3033
H14II	PIE	15 LOWER	Uluzzian	B1	CLC050	Fail
H14II	PIE	15 LOWER	Uluzzian	B1	CLC051	Rupicapra	1105.6	1180.6	1196.7	1427.6	1580.6	1648.6	2131.8	2792	2883	2898	3017	3033
H14II	PIE	15 LOWER	Uluzzian	B1	CLC052	Rupicapra	1105.6	1180.6	1197.6	1427.6	1580.3	1648.6	2130.8	2792	2883	2898	3017	3033
H14II	PIE	15 LOWER	Uluzzian	B1	CLC053	Unidentified Deer	1105.6			1427.7	1550.6	1648.6	2130.5		2883	2898
H14II	PIE	15 LOWER	Uluzzian	B1	CLC054	Fail
H14II	PIE	15 LOWER	Uluzzian	B1	CLC055	Fail
H14II	PIE	15 LOWER	Uluzzian	B1	CLC056	Cervid	1105.6	1180.6	1196.6	1427.7	1550.6	1648.6	2130.5	2792	2883	2898	3017	3032.5
H14II	PIE	15 LOWER	Uluzzian	B1	CLC057	Rupicapra	1105.6	1180.6	1197.6	1427.6	1580.6	1648.6	2130.8	2792	2883	2898	3016.5	3032.5
H14II	PIE	15 LOWER	Uluzzian	B1	CLC058	Fail
H14II	PIE	15 LOWER	Uluzzian	B1	CLC059	Cervid	1105.6	1181.6		1427.6	1550.6	1648.6	2130.5	2792.6	2883	2898.6	3018.3	3032.4
H14IV	PIE	15 LOWER 16 LOWER UPPER	Uluzzian	B1	CLC060	Rupicapra	1105.6	1180.6		1427.7	1580.6	1648.6	2131.8	2792	2883	2898	3017	3032.5
H14IV	PIE	15 LOWER 16 LOWER UPPER	Uluzzian	B1	CLC061	Rupicapra	1105.6	1180.6	1196.6	1427.7	1580.7	1648.7	2131		2883	2899	3017	3033
H14IV	PIE	15 LOWER 16 LOWER UPPER	Uluzzian	B1	CLC062	Rupicapra	1105.6	1180.6	1196.6	1427.7	1580.7	1648.7	2131		2883	2899	3017	3033
F12III	PIE	14 LOWER UPPER	Uluzzian	B1	CLC063	Capreolus capreolus	1105.6	1180.6		1427.7	1550.7	1648.7	2131	2792.7	2883	2899	3043	3059
F12III	PIE	14 LOWER UPPER	Uluzzian	B1	CLC064	Rupicapra	1105.6	1180.6	1196.6	1427.7	1580.7	1648.7	2130.6	2792.8	2883	2898.7	3016.5	3032.5
F12III	PIE	14 LOWER UPPER	Uluzzian	B1	CLC065	Capreolus capreolus	1105.6	1181.6	1196.6	1427.7	1550.7	1648.7	2131.0	2792.7	2883	2898.8	3042.5	3058.5
F12III	PIE	14 LOWER UPPER	Uluzzian	B1	CLC066	Cervid	1105.6	1181.6	1197.6	1427.7	1550.7	1648.8	2130.6	2792.8	2883	2898.7	3017.4	3032.5
F12III	PIE	14 LOWER UPPER	Uluzzian	B1	CLC067	Capreolus capreolus	1105.6	1181.6	1197.7	1427.7	1550.7	1648.7	2131		2883	2899	3043	3059
F14IV	PIE	14 UPPER	Uluzzian	B1	CLC068	Cervid	1105.5	1181.5		1427.6	1550.6	1648.7	2130.9		2883.2	2899.2		3033.2
F14IV	PIE	14 UPPER	Uluzzian	B1	CLC069	Bos/Bison	1105.5	1192.6	1208.6	1427.6	1580.7	1648.7	2131	2793	2853.1	2869.1	3017.2	3033.2
F14IV	PIE	14 UPPER	Uluzzian	B1	CLC070	Cervid	1105.6	1180.6		1427.7	1550.7	1648.8	2130.6		2883	2899.1	3018.1	3033.2
F14IV	PIE	14 UPPER	Uluzzian	B1	CLC071	Fail
F14IV	PIE	14 UPPER	Uluzzian	B1	CLC072	Cervid	1105.6	1181		1427.7	1550.7	1648.8	2130.6	2792	2883	2899.1	3017.1	3033.2
F14IV	PIE	14 UPPER	Uluzzian	B1	CLC073	Bos/Bison	1105.5	1192.6	1208.6	1427.6	1580.7	1648.7	2131	2793	2853.1	2869.1	3017.2	3033.2
F14IV	PIE	14 UPPER	Uluzzian	B1	CLC074	Cervid	1105.6	1180.6		1427.7	1550.7	1648.8	2130.6	2792	2883	2899.1	3018.1	3033.2
G14II	PIE	15 LOWER	Uluzzian	B1	CLC075	Cervid	1105.6	1180.6	1196	1427.7	1550.7	1648.8	2130.6	2792	2883	2899.1	3018.1	3033.2
G14II	PIE	15 LOWER	Uluzzian	B1	CLC076	Cervid	1105.6	1180.6	1196.6	1427.7	1550.7	1648.7	2130.6	2791.8	2883	2898	3017	3032.6
G14II	PIE	15 LOWER	Uluzzian	B1	CLC077	Cervid	1105.6			1427.7	1550.7	1648.7	2130.6	2792			3017	3032.6
G14II	PIE	15 LOWER	Uluzzian	B1	CLC078	Cervid	1105.6	1181	1197	1427.7	1550.7	1648.7	2130.6	2792	2883	2898	3017	3032.6
H14II	PIE	16 LOWER	Uluzzian	B1	CLC079	Cervid	1105.6	1180	1196.2	1427.7	1550.7	1648.7	2130.6	2792	2883	2898	3017	3032.6
H14II	PIE	16 LOWER	Uluzzian	B1	CLC080	Rupicapra	1105.6	1180	1197	1427.7	1580.6	1648.7	2130.6	2792	2883	2898	3017	3032.6
H14II	PIE	16 LOWER	Uluzzian	B1	CLC081	Cervid	1105.6	1180	1196.2	1427.7	1550.7	1648.7	2130.6	2792	2883	2898	3017	3032.6
H14II	PIE	16 LOWER	Uluzzian	B1	CLC082	Fail
H14II	PIE	16 LOWER	Uluzzian	B1	CLC083	Bos/Bison	1105.5	1192.6	1208.6	1427.7	1580.7		2131.0		2856.3	2869.3	3018.4	3033.4
F12II	PIE	16 UPPER	Uluzzian	B1	CLC084	Cervid	1105.5	1180.5	1197.6	1427.7	1550.7	1648.8	2131.0		2883	2899	3018	3033
F12II	PIE	16 UPPER	Uluzzian	B1	CLC085	Capreolus capreolus	1105.5	1180.6	1197.6	1427.7	1550.7	1648.8	2131.0		2883	2899	3044	3059
F12II	PIE	16 UPPER	Uluzzian	B1	CLC086	Cervid	1105.5	1180.5	1197.6	1427.7	1550.7	1648.8	2131.0	2792	2883	2899	3018	3033
E12II	PIE	13 LOWER	Uluzzian	B2	CLC087	Bos/Bison	1105.5	1192.7	1208.7	1427.8	1580.8	1648.8	2131	2792.6	2852.7	2868.7	3017.5	3033.6
E12II	PIE	13 LOWER	Uluzzian	B2	CLC088	Equus sp.	1105.5	1182.6	1199.6	1427.8	1550.8	1650.7	2144.8	2820.5	2882.7	2898.5	2983.4	2999.5
E12II	PIE	13 LOWER	Uluzzian	B2	CLC089	Cervid	1105.5	1180.6	1196.7	1427.8	1550.8	1648.8	2131	2792.6	2882.7	2898.6	3017.4	3033.4
E12II	PIE	13 LOWER	Uluzzian	B2	CLC090	Equus sp.	1105.5			1427.8	1550.8	1650.6	2144.5	2820.7	2882.7	2898.6	2982.6	2999.5
H13IV	PIE	13 LOWER	Uluzzian	B2	CLC091	Fail
H13IV	PIE	13 LOWER	Uluzzian	B2	CLC092	Fail
H13IV	PIE	13 LOWER	Uluzzian	B2	CLC093	Artiodactyla	1105.6			1427.7	1580.6	1648	2130.5
H13IV	PIE	13 LOWER	Uluzzian	B2	CLC094	Fail
FI4II	PIE	14 LOWER	Uluzzian	B2	CLC095	Bos/Bison	1105.5	1192.6	1208.7	1427.8	1580.6	1648.8	2131	2792.6	2852.5	2868.7	3017.4	3033.4
FI4II	PIE	14 LOWER	Uluzzian	B2	CLC096	Bos/Bison	1105.5	1192.6	1208.7	1427.8	1580.6	1648.8	2131	2792.6	2852.5	2868.7	3017.4	3032.4
FI4II	PIE	14 LOWER	Uluzzian	B2	CLC097	Cervid	1105.5	1180.6	1196.6	1427.8	1550.6	1648.8	2130.5	2791.6	2883	2899.6	3017.4	3033.4
G12III	PIE	16 UPPER LOWER	Uluzzian	B2	CLC098	Cervid	1105.5	1180.6	1196.6	1427.8	1550.8	1648.8	2130.5	2791.6	2883	2899.6	3017.4	3033.4
G12III	PIE	16 UPPER LOWER	Uluzzian	B2	CLC099	Capreolus capreolus	1105.5	1180.7	1196.7	1427.8	1550.8	1648.8	2131	2792.6	2882.7	2898.6	3043.5	3059.6
G12III	PIE	16 UPPER LOWER	Uluzzian	B2	CLC100	Cervid	1105.5	1180.6	1196.7	1427.8	1550.8	1648.8	2131	2792.6	2882.7	2898.6	3017.4	3033.4
G12III	PIE	16 UPPER LOWER	Uluzzian	B2	CLC101	Carnivore	1105.6			1453.7	1566.8		2146.4		2853.5	2869		2999
G12II	PIE	14 UPPER	Uluzzian	B2	CLC102	Cervid	1105.5			1427.8	1550.8	1648.8	2131	2792.6	2882.7	2898.6	3017.4	3033.4
G12II	PIE	14 UPPER	Uluzzian	B2	CLC103	Cervid	1105.5	1180.6	1197.6	1427.8	1550.8	1648.8	2131	2792.6	2882.7	2898.6	3017.4	3033.4
G12II	PIE	14 UPPER	Uluzzian	B2	CLC104	Cervid	1105.5	1180.6	1197.6	1427.8	1550.8	1648.8	2131	2792.6	2882.7	2898.6	3017.4	3033.4
G12II	PIE	14 UPPER	Uluzzian	B2	CLC105	Cervid	1105.5	1180.6	1196.6	1427.8	1550.8	1648.8	2131	2792.6	2882.7	2898.6	3017.4	3033.4
H14III	PIE	15 LOWER 16 LOWER UPPER	Uluzzian	B2	CLC106	Rupicapra	1105.5	1180.6	1197.6	1427.8	1580.6	1648.8	2130.5	2793.5	2882.7	2898.6	3017.4	3033.4
H14III	PIE	15 LOWER 16 LOWER UPPER	Uluzzian	B2	CLC107	Rupicapra	1105.5	1180.6	1196.6	1427.8	1580.6	1648.8	2130.5	2791.6	2883	2899.6	3017.4	3033.4
H14III	PIE	15 LOWER 16 LOWER UPPER	Uluzzian	B2	CLC108	Rupicapra	1105.5	1180.6	1196.6	1427.8	1580.6	1648.8	2130.5	2791.6	2883	2899.6	3017.4	3033.4
H14II	PIE	16 LOWER	Uluzzian	B2	CLC109	Equus sp.	1105.6			1427.8	1550.9	1650.9	2144.8
H14II	PIE	16 LOWER	Uluzzian	B2	CLC110	Rupicapra	1105.6	1180.6	1196.7	1427.7	1580.7	1648.8	2130.8	2792.6	2882.6	2899	3018.4	3033.5
H14II	PIE	16 LOWER	Uluzzian	B2	CLC111	Rupicapra	1105.6	1180.6	1196.7	1427.7	1580.7	1648.8	2130.8	2792.6	2882.6	2899	3018.4	3033.5
H14II	PIE	16 LOWER	Uluzzian	B2	CLC112	Rupicapra	1105.6	1180.6	1196.7	1427.7	1580.7	1648.8	2130.8	2792.6	2882.6	2899	3018.4	3033.5
E12II	PIE	14 LOWER	Uluzzian	B2	CLC113	Rupicapra	1105.6	1180.6	1196.7	1427.7	1580.7	1648.8	2130.8	2792.6	2882.6	2899	3018.4	3033.5
H14II	PIE	16 LOWER	Uluzzian	B2	CLC114	Capra sp.	1105.6	1180.6	1196.7	1427.7	1580.7	1648.8	2130.8	2792.6	2882.6	2899	3077.3	3092.3
H14II	PIE	16 LOWER	Uluzzian	B2	CLC115	Capreolus capreolus	1105.6	1182.6		1427.7	1550.6	1648.8	2130.8	2792.6	2882.6	2899	3043	3059
H14II	PIE	16 LOWER	Uluzzian	B2	CLC116	Rupicapra	1105.5	1180.6	1196.7	1427.8	1580.6	1648.8	2131	2792.6	2883	2898	3017.4	3032.4
H14II	PIE	16 LOWER	Uluzzian	B2	CLC117	Rupicapra	1105.5	1180.6	1196.7	1427.8	1580.6	1648.8	2131	2792.6	2883	2898	3017.4	3032.4
E12II	PIE	14 UPPER	Uluzzian	B2	CLC118	Cervid	1105.5	1180.6	1196.7	1427.8	1550.6	1648.8	2131	2792.6	2881.6	2898	3018
E12II	PIE	14 UPPER	Uluzzian	B2	CLC119	Cervid	1105.5	1180.6	1196.7	1427.8	1550.6	1648.8	2131	2792.6	2883	2898	3017.4
E12II	PIE	14 UPPER	Uluzzian	B2	CLC120	Rupicapra	1105.5	1180.6	1196.7	1427.8	1580.6	1648.8	2131	2792.6	2883	2898	3017.4	3032.4
F12III	PIE	14 UPPER LOWER	Uluzzian	B2	CLC121	Cervid	1105.5	1180.6	1196.7	1427.8	1550.6	1648.8	2131	2792.6	2883	2898	3017.4	3032.4
F12III	PIE	14 UPPER LOWER	Uluzzian	B2	CLC122	Equus sp.	1105.6	1182.6		1427.5	1550.7	1650.7	2144.8	2820.5	2882.5	2898.5	2982.5	2999.5
G12IV	PIE	16 LOWER	Uluzzian	B2	CLC123	Sus sp.	1105.6	1180.6	1196.7	1453.5	1550.5	1648.8	2130.8	2820.2	2882.6	2899	3017.4	3033.5
G12IV	PIE	16 LOWER	Uluzzian	B2	CLC124	Capreolus capreolus	1105.6	1180.6	1196.6	1427.5	1550.7	1648	2130.4	2792.2	2882.5	2898.5	3043.3	3059.3
F12II	PIE	16 UPPER	Uluzzian	B2	CLC125	Rupicapra	1105.6	1180.6	1196.7	1427.7	1580.7	1648.8	2130.8	2792.6	2882.6	2899	3018.4	3033.5
F12II	PIE	16 UPPER	Uluzzian	B2	CLC126	Cervid	1105.6	1180.6		1427.7	1550.6	1648.8	2130.8	2792.6	2882.6	2899	3016.4	3032.4
G12II	PIE	15 UPPER LOWER	Uluzzian	B2	CLC127	Bos/Bison	1105.5	1192.6	1208.7	1427.8	1580.6	1648.8	2131	2792.6	2852.5	2868.7	3017.4	3032.4
G12II	PIE	15 UPPER LOWER	Uluzzian	B2	CLC128	Bos/Bison	1105.5	1192.6	1208.7	1427.8	1580.6	1648.8	2131	2792.6	2852.5	2868.7	3017.4	3032.4
H13III	PIE	15 UPPER	Uluzzian	B2	CLC129	Cervid	1105.5	1180.6	1196.7	1427.8	1550.6	1648.8	2131	2792.6	2883	2898	3016.4	3032.4
H13III	PIE	15 UPPER	Uluzzian	B2	CLC130	Rupicapra	1105.5	1180.6	1196.7	1427.8	1580.6	1648.8	2131	2792.6	2883	2898	3017.4	3032.4
E12III	PIE	13 UPPER	Uluzzian	B2	CLC131	Rupicapra	1105.5	1180.6	1196.7	1427.8	1580.6	1648.8	2131	2792.6	2883	2898	3017.4	3032.4
E12II	PIE	12 UPPER	Uluzzian	B2	CLC132	Equus sp.	1105.5	1182.6	1198.6	1427.8	1550.8	1650.8	2144.8	2819.8	2883	2898		2998.6
G12III	PIE	16 UPPER LOWER	Uluzzian	B2	CLC133	Ursus (Bear)	1105.6		1233.7	1453.7	1566.8	2792	2163		2853	2869	2956.6	2973
F12II	PIE	15 LOWER	Uluzzian	B2	CLC134	Cervid	1105.6	1180.6	1196.7	1427.7	1550.6	1648.7	2131	2792	2883	2899	3017.3	3032.5
F12II	PIE	15 LOWER	Uluzzian	B2	CLC135	Cervid	1105.6	1180.6	1196.7	1427.7	1550.6	1648.7	2131	2792	2883	2899	3017.3
F12II	PIE	15 LOWER	Uluzzian	B2	CLC136	Cervid	1105.6	1180.6	1196.7	1427.7	1550.6	1648.7	2131	2792	2883	2899	3017.3	3033
F14IV	RPI	13 UPPER	Uluzzian	B2	CLC137	Sus sp.	1105.6		1197.7	1453.7	1550.6		2130.5
F14IV	RPI	13 UPPER	Uluzzian	B2	CLC138	Bos/Bison	1105.6	1192.7	1208.7	1427.7	1580.6	1648.6	2131	2792.6	2853	2869	3017.3	3033
F14IV	RPI	13 UPPER	Uluzzian	B2	CLC139	Ursus (Bear)	1105.6	1217.7		1453.7	1566.6	2792	2163		2852.8	2869
F14IV	RPI	13 UPPER	Uluzzian	B2	CLC140	Equus sp.	1105.6	1182.6		1427.6	1550.6	1650.6	2144.4	2820.6	2883	2899
G14III	RPI	13 LOWER	Uluzzian	B2	CLC141	Equus sp.	1105.6	1182.6		1427.6	1550.6	1650.6	2144.4	2820.6	2883	2899	2982.6	2999
G14III	RPI	13 LOWER	Uluzzian	B2	CLC142	Equus sp.	1105.6	1182.6	1198.6	1427.6	1550.6	1650.6	2144.4	2820.6	2883	2899	2982.6	2999
G14III	RPI	13 LOWER	Uluzzian	B2	CLC143	Equus sp.	1105.6	1182.6	1198.6	1427.6	1550.6	1650.6	2144.4	2820.6	2883	2899		2999
H14III	RPI	13 LOWER	Uluzzian	B2	CLC144	Equus sp.	1105.6	1182.6		1427.7	1550.6	1650.6	2144.5	2819.7	2883	2899	2982.5	2999.5
H14III	RPI	13 LOWER	Uluzzian	B2	CLC145	Equus sp.	1105.6	1182.6	1198.7	1427.7	1550.6	1650.6	2145	2820.7	2883	2899
H14III	RPI	13 LOWER	Uluzzian	B2	CLC146	Cervid	1105.6		1197.6	1427.7	1550.6	1648.7	2131	2792	2883	2899	3016.4	3032.4
H14III	RPI	13 LOWER	Uluzzian	B2	CLC147	Cervid	1105.6	1180.6	1196.7	1427.7	1550.6	1648.7	2131	2792	2883	2899	3017.3	3033
H14III	RPI	13 LOWER	Uluzzian	B2	CLC148	Equus sp.	1105.6	1182.6	1198.6	1427.7	1550.6	1650.6	2144.5	2819.7	2883	2899		2999
H14III	RPI	13 LOWER	Uluzzian	B2	CLC149	Equus sp.	1105.6	1182.6	1198.6	1427.7	1550.6	1650.6	2144.5	2819.7	2883	2899	2983	2999
H14III	RPI	13 LOWER	Uluzzian	B2	CLC150	Cervid	1105.6	1182.6	1197.6	1427.7	1550.6	1648.6	2131	2792.6	2883	2899	3017.3	3033
G13	RPI	12	Uluzzian	B2	CLC151	Cervid	1105.6	1180.6	1196.6	1427.6	1550.6	1648.6	2131	2792.6	2883	2899	3017.3	3032.5
G13	RPI	12	Uluzzian	B2	CLC152	Cervid	1105.6	1180.6	1197.6	1427.6	1550.6	1648.6	2131	2792.7	2883	2899	3017	3032.5
G13	RPI	12	Uluzzian	B2	CLC153	Cervid	1105.6		1197.6	1427.7	1550.6	1650.6	2130.6	2791.8	2883	2899	3017.4	3032.6
H13III	RPI	13 LOWER	Uluzzian	B2	CLC154	Equus sp.	1105.6	1182.6	1198.6	1427.6	1550.6	1650.6	2144.4	2820.6	2883	2899		2999
H13III	RPI	13 LOWER	Uluzzian	B2	CLC155	Fail
H13III	RPI	13 LOWER	Uluzzian	B2	CLC156	Fail
H13III	RPI	13 LOWER	Uluzzian	B2	CLC157	Fail
H13III	RPI	13 LOWER	Uluzzian	B2	CLC158	Fail
F14IV	RPI	13 LOWER	Uluzzian	B2	CLC159	Equus sp.	1105.6	1182.6		1427	1550.7	1650.7	2145	2821.1	2883.2	2899.2		3000.2
F14IV	RPI	13 LOWER	Uluzzian	B2	CLC160	Bos/Bison	1105.6	1192.7	1208.7	1427.7	1580.8	1648.8	2131	2792.2	2853.3	2869.3	3018.3	3033.3
F14IV	RPI	13 LOWER	Uluzzian	B2	CLC161	Equus sp.	1105.6	1182.6	1198.6	1427	1550.7	1650.7	2145	2821.1	2883.2	2899.2		2999.4
F14IV	RPI	13 LOWER	Uluzzian	B2	CLC162	Equus sp.	1105.6	1182.6	1198.6	1427	1550.7	1650.7	2145	2821.1	2883.2	2899.2		2999.4
G12I	RPI	12 UPPER	Uluzzian	B2	CLC162	Equus sp.	1105.6	1182.6	1198.6	1427	1550.7		2145	2821.1	2883.2	2899.2		2999.4
G12I	RPI	12 UPPER	Uluzzian	B2	CLC164	Equus sp.	1105.6	1182.6		1427	1550.7		2145	2821.1	2883.2	2899.2	2984.2	2999.4
G12I	RPI	12 UPPER	Uluzzian	B2	CLC165	Equus sp.	1105.6	1182.6		1427	1550.7		2145	2821.1	2883.2	2899.2	2984.2	2999.4
G12I	RPI	12 UPPER	Uluzzian	B2	CLC166	Equus sp.	1105.6	1182.6	1198.6	1427	1550.7	1650.8	2145	2821.1	2883.2	2899.2	2983.4	2999.4
H14I	RPI	13 UPPER	Uluzzian	B3	CLC167	Cervid	1105.6	1180.6	1196.6	1427.7	1550.7	1648.7	2130.8	2792.5	2882.6	2899	3017.4	3033.4
H14I	RPI	13 UPPER	Uluzzian	B3	CLC168	Equus sp.	1105.6	1182.6	1198.7	1427.7	1550.7	1649.7	2144.8	2820.6	2883.2	2899.2		2999.6
H14I	RPI	13 UPPER	Uluzzian	B3	CLC169	Fail
H14I	RPI	13 UPPER	Uluzzian	B3	CLC170	Fail
H13I	RPI	13 LOWER	Uluzzian	B3	CLC171	Fail
H13I	RPI	13 LOWER	Uluzzian	B3	CLC172	Fail
G13II	RPI	13 LOWER	Uluzzian	B3	CLC173	Bos/Bison	1105.6	1192.6		1427.7	1580.6	1648.7	2131	2792.6	2853.6	2869
G13II	RPI	13 LOWER	Uluzzian	B3	CLC174	Fail
G13II	RPI	13 LOWER	Uluzzian	B3	CLC175	Fail
H13I	RPI	12 SOTTO	Uluzzian	B3	CLC176	Fail
H13I	RPI	12 SOTTO	Uluzzian	B3	CLC177	Fail
H13I	RPI	12 SOTTO	Uluzzian	B3	CLC178	Fail
H14III	RPI	12 LOWER	Uluzzian	B3	CLC179	Equus sp.	1105.6	1182.6		1427.7	1550.7	1650.7	2145.8	2820.5	2882.6	2899
H14III	RPI	12 LOWER	Uluzzian	B3	CLC180	Sus sp.	1105.6	1180.6		1453.7	1550.7		2131	2821	2883.1	2899.1	3017.4	3033.4
H14III	RPI	12 LOWER	Uluzzian	B3	CLC181	Equus sp.	1105.6	1182.6		1427.7	1550.7	1649.7		2821.1	2883.2	2899.2
H14III	RPI	12 LOWER	Uluzzian	B3	CLC182	Fail
H14III	RPI	12 LOWER	Uluzzian	B3	CLC183	Equus sp.	1105.6	1182.6		1427.7	1550.7		2144.8	2820.6	2883.2	2899.2	2983.3	2999.6
H14III	RPI	12 LOWER	Uluzzian	B3	CLC184	Equus sp.	1105.6	1182.6		1427.7	1550.7		2144.8	2821.2	2883.2	2899.2	2983.3	2999.6
H12I	RPI	13 LOWER	Uluzzian	B3	CLC185	Equus sp.	1105.6	1182.6	1198.6	1427.7	1550.7	1649.7	2144.8	2820.7	2883.2	2899.2
H12I	RPI	13 LOWER	Uluzzian	B3	CLC186	Equus sp.	1105.6	1182.6	1198.6	1427.7	1550.7		2144.8	2820.7	2883.2	2899.2		2999.2
G13II	RPI	14 UPPER	Uluzzian	B3	CLC187	Cervid	1105.6	1180.6	1196.6	1427.7	1550.7	1648.8	2131	2792	2883	2899	3017.3	3033.3
G13II	RPI	14 UPPER	Uluzzian	B3	CLC188	Cervid	1105.6	1180.6	1196.6	1427.7	1550.7	1648.8	2131	2792	2883	2899	3017.3	3033.3
G13II	RPI	14 UPPER	Uluzzian	B3	CLC189	Cervid	1105.6			1427.7	1550.7	1648.8	2131	2792	2883	2899	3017.3	3033.3
G13II	RPI	14 UPPER	Uluzzian	B3	CLC190	Cervid	1105.6	1180.6		1427	1550.8	1648.8	2131.6	2792	2883.2	2899.3	3017.4	3033.4
G13II	RPI	14 UPPER	Uluzzian	B3	CLC191	Cervid	1105.6	1180	1197	1427.7	1550.8	1648.9	2131.7	2792.6	2883.3	2899	3017	3033
G1HII	RPI	12 UPPER	Uluzzian	B3	CLC192	Unidentified Deer	1105.6	1181.6		1427.7	1550.7	1648.8	2131	2793	2883.2	2899.1
G1HII	RPI	12 UPPER	Uluzzian	B3	CLC193	Equus sp.	1105.6	1182.5	1199.5	1427.7	1550.8	1650.9			2884.4	2900
G1HII	RPI	12 UPPER	Uluzzian	B3	CLC194	Cervid	1105.6	1180.6	1196.6	1427.7	1550.6	1649	2131		2883.5	2899.6	3020	3034
G1HII	RPI	12 UPPER	Uluzzian	B3	CLC195	Equus sp.	1105.5	1182.6		1427.7	1550.8	1650.8	2145.4	2821.3	2883.3	2899.6		3000.3
G1HII	RPI	12 UPPER	Uluzzian	B3	CLC196	Equus sp.	1105.6	1182.6		1427.7			2144.9		2883	2899		2999.8
G1HII	RPI	12 UPPER	Uluzzian	B3	CLC197	Equus sp.	1105.6	1182.6		1427.7	1550.7	1650.7	2145	2820.7	2882.8	2899	2983	2999.8
G1HII	RPI	12 UPPER	Uluzzian	B3	CLC198	Equus sp.	1105.6	1182.6	1198.6	1427.7	1550.7	1650.7	2145.1	2820.2	2883.2	2899.3		2999.3
G1HII	RPI	12 UPPER	Uluzzian	B3	CLC199	Equus sp.	1105.6	1182.6		1427.7	1550.7	1650.7	2145.1	2820.2	2883.2	2899.3		3000
G12I	RPI	13 LOWER	Uluzzian	B3	CLC200	Cervid	1105.6	1180.6	1197	1427.7	1550.6	1648.8	2131	2792	2883.3	2899.3	3018.3	3033
G12I	RPI	13 LOWER	Uluzzian	B3	CLC201	Bos/Bison	1105.6	1192.7	1208.7	1427.7	1580.8	1648.8	2131		2853.2	2869.2	3018.2	3034.1
G12I	RPI	13 LOWER	Uluzzian	B3	CLC202	Unidentified Caprines	1105.6	1180.6	1196.7	1427	1580.8	1648.8	2131.6	2792	2883.2	2899.3
G14II	RPI	13 LOWER	Uluzzian	B3	CLC203	Unidentified Deer	1105.6	1182.6		1427.7	1550.7	1648.8	2131	2794	2883.2	2899.1
G14II	RPI	13 LOWER	Uluzzian	B3	CLC204	Unidentified Deer	1105.6	1181	1196.6	1427.7	1550.8	1648.9	2131.7		2883.5	2899.6	3020	3035
G14II	RPI	13 LOWER	Uluzzian	B3	CLC205	Unidentified Caprines	1105.6	1180.6	1197	1427.7	1580.8	1648.8	2131.5	2793	2883	2899
G14II	RPI	13 LOWER	Uluzzian	B3	CLC206	Sus sp.	1105.6	1180.6	1196.6	1453.8	1550.8	1648.8	2131.5	2821	2883.7	2899.7		3033.3
G14II	RPI	12 UPPER	Uluzzian	B3	CLC207	Fail
G14II	RPI	12 UPPER	Uluzzian	B3	CLC208	Equus sp.	1105.6	1185.6	1198.6	1427.7	1550.8	1650	2145	2820.2	2883.3	2899.3		2999.4
G14II	RPI	12 UPPER	Uluzzian	B3	CLC209	Equus sp.	1105.6			1427.7	1550.7		2145.1	2820.2	2883.2	2899.3	2984	2999.3
G14II	RPI	12 UPPER	Uluzzian	B3	CLC210	Equus sp.	1105.6	1182.6	1198.6	1427.7	1550.7	1650.7	2145.1	2820.2	2883.2	2899.3		2999.3
G14II	RPI	12 UPPER	Uluzzian	B3	CLC211	Equus sp.	1105.6	1182.6		1427.7	1550	1650.7	2145		2883
G14II	RPI	12 UPPER	Uluzzian	B3	CLC212	Equus sp.	1105.6	1182.6	1198.6	1427.7	1550.7	1650.7	2145	2820.2	2883.2	2899.2		2999.3
G14II	RPI	12 UPPER	Uluzzian	B3	CLC213	Fail
G14II	RPI	12 UPPER	Uluzzian	B3	CLC214	Sus sp.	1105.6	1180.6	1196.6	1453.8	1550.8	1648.8	2131	2821.2	2883.3	2899.3	3017	3033.3
G14II	RPI	12 UPPER	Uluzzian	B3	CLC215	Sus sp.	1105.6	1181	1196.6	1453.8	1550.8	1648.8	2131	2821.2	2883.3	2899.3
H13I	RPI	12 UPPER	Uluzzian	B3	CLC216	Cervid	1105.6	1180.6	1196.6	1427.8	1550.8	1648.8	2131	2792	2883	2899.1	3018	3033
H13I	RPI	12 UPPER	Uluzzian	B3	CLC217	Fail
G13	RPI	13	Uluzzian	B3	CLC218	Cervid	1105.6	1180	1196	1427.7	1550.8	1648.8	2131	2793	2883.3	2899.3	3018	3033.4
G13	RPI	13	Uluzzian	B4	CLC219	Cervid	1105.6	1182.6	1197.6	1427.7	1550.6	1648	2130.4		2883	2899		3032.3
G13II	RPI	12 UPPER	Uluzzian	B3	CLC220	Equus sp.	1105.6	1182.6	1198.6	1427.7	1550.8		2145	2821	2883.3	2899.3		2999.7
G13II	RPI	12 UPPER	Uluzzian	B3	CLC221	Equus sp.	1105.6	1182.6	1198.6	1427.7	1550.8	1650.8	2145	2821	2883.3	2899.3	2984.3	2999.3
G13II	RPI	12 UPPER	Uluzzian	B3	CLC222	Equus sp.	1105.6	1182.6		1427.7	1550.7	1650.7	2145	2821.1	2883.3	2899.3		2999.2
G13II	RPI	12 UPPER	Uluzzian	B3	CLC223	Fail
G13II	RPI	12 UPPER	Uluzzian	B3	CLC224	Equus sp.	1105.6	1182	1198.6	1427.7	1550.8	1650.8	2145.1	2820.2	2883.3	2899.4	2983.3	2999.4
H13III	RPI	13 UPPER	Uluzzian	B3	CLC225	Equus sp.	1105.6	1182	1198.6	1427.7	1550.8	1650.8	2145.1	2820.2	2883.3	2899.4	2983.3	2999.4
H13III	RPI	13 UPPER	Uluzzian	B3	CLC226	Equus sp.	1105.6	1182.6	1198.6	1427.7	1550.8	1650	2145.4	2821	2884	2900		3000
H13III	RPI	13 UPPER	Uluzzian	B3	CLC227	Equus sp.	1105.6	1182.6	1198.6	1427.8	1550.8	1650.9	2145.5	2821.4	2883	2900		3000
H13III	RPI	13 UPPER	Uluzzian	B3	CLC228	Fail
H13III	RPI	13 UPPER	Uluzzian	B3	CLC229	Equus sp.	1105.6	1182.6		1427.7	1550.7			2883.2
H13III	RPI	13 UPPER	Uluzzian	B3	CLC230	Fail
H13III	RPI	13 UPPER	Uluzzian	B3	CLC231	Capra sp.	1105.6	1180.6	1196.7	1427.7	1580.8	1648.8	2131	2793	2883.3	2899.3		3093.2
G14II	RPI	13 LOWER	Uluzzian	B3	CLC232	Cervid	1105.6	1180.6	1196.7	1427.7	1550.7	1648.8	2131	2792.1	2883.3	2899.3	3017.2	3033.2
G14II	RPI	13 LOWER	Uluzzian	B3	CLC233	Cervid	1105.6	1180.6	1196.7	1427.7	1550.7	1648.8	2131	2793	2883.3	2899	3018	3033.3
G12I	RPI	13 UPPER	Uluzzian	B3	CLC234	Cervid	1105.6			1427.7	1550.7	1648.8	2131	2793	2883.3	2899	3018	3033.3
G12I	RPI	13 UPPER	Uluzzian	B3	CLC235	Sus sp.	1105.6	1180.6	1196.6	1453.7	1550.7	1648.8	2131	2821	2883.2	2899.2	3018.2	3033.3
G12I	RPI	13 UPPER	Uluzzian	B3	CLC236	Cervid	1105.6	1181		1427.7	1550.8	1648.8	2131		2883.3	2899.4	3019	3034
H13IV	RPI	13 LOWER	Uluzzian	B3	CLC237	Fail
H13IV	RPI	13 LOWER	Uluzzian	B3	CLC238	Fail
H13IV	RPI	13 LOWER	Uluzzian	B3	CLC239	Fail
G12I	RPI	12 UPPER	Uluzzian	B3	CLC240	Equus sp.	1105.6	1182.6	1199.6	1427.7	1550.8	1650.8	2145.4	2820.1	2883.5	2899.2		3000
G12I	RPI	12 UPPER	Uluzzian	B3	CLC241	Bos/Bison	1105.6	1192.7	1208.7	1427.7	1580.7	1648.8	2131	2792	2853.2	2869.2	3018	3033.2
G12I	RPI	12 UPPER	Uluzzian	B3	CLC242	Equus sp.	1105.6	1182.6	1198.6	1427.7	1550.7	1650.8	2145.1	2821.1	2883.3	2899.3	2983	2999.4
G12I	RPI	12 UPPER	Uluzzian	B3	CLC243	Equus sp.	1105.6	1182.6	1198.6	1427.7	1550.7	1650.8	2145.1	2821.1	2883.3	2899.3		2999.4
G12I	RPI	12 UPPER	Uluzzian	B3	CLC244	Equus sp.	1105.6	1182.6	1198.6	1427.7	1550.7		2145.1	2821.1	2883.3	2899.3		2999.3
G12I	RPI	12 UPPER	Uluzzian	B3	CLC245	Equus sp.	1105.6	1182.6		1427.7	1550.7		2145.1	2821.1	2883.3	2899.3	2984	2999.3
G12I	RPI	12 UPPER	Uluzzian	B3	CLC246	Equus sp.	1105.6	1182.6		1427.7	1550.7		2145.1	2820.1	2883.3	2899.3	2984.4	2999.3
G13II	RPI	12 UPPER	Uluzzian	B3	CLC247	Equus sp.	1105.6	1182.6	1198.6	1427.7	1550.7	1650.8	2145.1	2820.1	2883.3	2899.3	2983.4	2999.3
G13II	RPI	12 UPPER	Uluzzian	B3	CLC248	Equus sp.	1105.6	1182.6		1427.7	1550.7		2145.1	2820.1	2883.3	2899.3	2983.4	2999.3
G13II	RPI	12 UPPER	Uluzzian	B3	CLC249	Fail
G13II	RPI	12 UPPER	Uluzzian	B3	CLC250	Equus sp.	1105.6	1182.6	1198.6	1427.7	1550.8	1650.8	2145.4		2883.5	2900		3000
G13II	RPI	12 UPPER	Uluzzian	B3	CLC251	Equus sp.	1105.6	1182.6	1199.6	1427.7	1550.8	1650.8	2145.4		2883.5
G13II	RPI	12 UPPER	Uluzzian	B3	CLC252	Bos/Bison	1105.6	1192.7	1208.7	1427.7	1580.7	1648.8	2131	2792	2853.2	2869.2	3018	3033.2
H13III	RPI	12 LOWER	Uluzzian	B3	CLC253	Capra sp.	1105.6	1180.6	1196.6	1427.7	1580.7	1648.8	2131	2792	2883.3	2899.3		3093.4
H13III	RPI	12 LOWER	Uluzzian	B3	CLC254	Equus sp.	1105.6	1182.6	1198.6	1427.7	1550.7	1650.8	2145.1	2821.1	2883.3	2899.3		2999.4
H13III	RPI	12 LOWER	Uluzzian	B3	CLC255	Equus sp.	1105.6	1182.6	1199	1427.7	1550.7	1650.8	2145.1	2821.1	2883.3	2899.3		3000
H13III	RPI	12 LOWER	Uluzzian	B3	CLC256	Capreolus capreolus	1105.6	1180.6	1196.5	1427.7	1550.7	1648.7	2130.9	2793	2883.3	2899.3	3044	3059.2
H13III	RPI	12 LOWER	Uluzzian	B3	CLC257	Equus sp.	1105.6	1182.6		1427.7	1550.7	1650.7	2145.1	2820.1	2883.3	2899.3		2999.3
H14III	RPI	13 LOWER	Uluzzian	B3	CLC258	Fail
H14III	RPI	13 LOWER	Uluzzian	B3	CLC259	Fail
H14III	RPI	13 LOWER	Uluzzian	B4	CLC0260	Fail
H14III	RPI	13 LOWER	Uluzzian	B4	CLC0261	Fail
H14III	RPI	13 LOWER	Uluzzian	B4	CLC0262	Fail
H14II	RPI	13 UPPER	Uluzzian	B4	CLC0263	Sus sp.	1105.6		1197.6	1453.7		1648.8	2131.1	2822	2883.5	2899.5	3017.6	3033.6
H14II	RPI	13 UPPER	Uluzzian	B4	CLC0264	Equus sp.	1105.6	1182.6	1199.6	1427.7	1550.7	1650.7	2145.1	2821.4	2883.5	2899.5
H14II	RPI	13 UPPER	Uluzzian	B4	CLC0265	Cervid	1105.6	1180.5	1197.6	1427.7	1550.7	1648.8	2131	2793.3	2883.4	2899.4	3017.4	3033.5
G13II	RPI	13 UPPER	Uluzzian	B4	CLC0266	Capra sp.	1105.6	1180.5		1427.7		1648.8	2131.1		2883.4	2899.4	3077.6	3093.6
G13II	RPI	13 UPPER	Uluzzian	B4	CLC0267	Capra sp.	1105.5	1180.5		1427.7		1648.7	2131.1	2793.4	2883.5	2899.5	3077.6	3093.7
G13II	RPI	13 UPPER	Uluzzian	B4	CLC0268	Cervid	1105.6	1180.6	1196.6	1427.7	1550.7	1648.8	2131.1	2793.4	2883.4	2899.5	3018.5	3033.6
G13II	RPI	13 UPPER	Uluzzian	B4	CLC0269	Equus sp.	1105.6	1182.6	1198.6	1427.7			2145.4	2822	2883.5		2984.6	2999.7
G14III	RPI	12 UPPER	Uluzzian	B4	CLC0270	Fail
G14III	RPI	12 UPPER	Uluzzian	B4	CLC0271	Bos/Bison	1105.6	1192.6	1208.6	1427.6	1580.6	1648.6	2130.5	2792.6	2853.1	2869.2	3017.2	3033.5
G14III	RPI	12 UPPER	Uluzzian	B4	CLC0272	Equus sp.	1105.6	1182.6		1427.6	1550.5	1649.5	2144.5	2819.5	2883	2899	2982.3	2999.3
G13II	RPI	12 LOWER	Uluzzian	B4	CLC0273	Equus sp.	1105.6	1182.6	1198.6	1427.6	1550.5	1650.5	2144.5	2819.5	2883	2899	2982.3	2999.3
G13II	RPI	12 LOWER	Uluzzian	B4	CLC0274	Equus sp.	1105.6	1182.6	1198.6	1427.6	1550.5	1650.5	2144.5	2819.5	2883			2999.3
G13II	RPI	13 LOWER	Uluzzian	B4	CLC0275	Cervid	1105.6	1181	1197	1427.7	1550.7	1648.8	2131		2883.4		3020	3034
G13II	RPI	13 LOWER	Uluzzian	B4	CLC0276	Cervid	1105.6	1180.6	1196.6	1427.6	1550.5	1648.8	2131.1		2883	2899	3019	3033.6
H14III	RPI	13 LOWER	Uluzzian	B4	CLC0277	Fail	1105.6			1427.7
H14III	RPI	13 LOWER	Uluzzian	B4	CLC0278	Equus sp.	1105.6			1427.7			2145.1		2883.5
H14III	RPI	13 LOWER	Uluzzian	B4	CLC0279	Cervid	1105.6	1180.6	1196.6	1427.7	1550.7	1648.8	2131.1	2793.4	2883.4	2899.5	3018.5	3033.6
H14III	RPI	13 LOWER	Uluzzian	B4	CLC0280	Fail
H14I	RPI	13 LOWER	Uluzzian	B4	CLC0281	Fail
H14I	RPI	13 LOWER	Uluzzian	B4	CLC0282	Equus sp.	1105.6	1182.6	1198.6	1427.6	1550.6	1650.5	2144.4		2882.5	2898		2999
H14I	RPI	13 LOWER	Uluzzian	B4	CLC0283	Fail
H14I	RPI	13 LOWER	Uluzzian	B4	CLC0284	Equus sp.	1105.6	1182.6	1199.6	1427.7	1550.6	1650.5	2144.5	2820.6	2882	2898		2999
H14I	RPI	13 LOWER	Uluzzian	B4	CLC0285	Equus sp.	1105.6	1182.6	1199.6	1427.7	1550.8	1650.8	2144.8	2819.8	2882	2899	2983	2999.2
H14I	RPI	13 LOWER	Uluzzian	B4	CLC0286	Fail
H14I	RPI	13 LOWER	Uluzzian	B4	CLC0287	Equus sp.	1105.6	1182.6	1198.6	1427.7	1550.8	1650.8	2145.2	2821	2883	2899		3000
H14I	RPI	13 LOWER	Uluzzian	B4	CLC0288	Fail
H14I	RPI	13 LOWER	Uluzzian	B4	CLC0289	Equus sp.	1105.6	1182.7	1198.6	1427.7	1550.8	1650.5	2145.2	2821	2883.6	2898.6		2999.7
H14I	RPI	13 LOWER	Uluzzian	B4	CLC0290	Cervid	1105.5	1180.6	1196.6	1427.7	1550.8	1648.8	2131.1		2883.5	2899.5	3017.6	3033.6
H14I	RPI	13 LOWER	Uluzzian	B4	CLC0291	Fail
G13I	RPI	12 UPPER	Uluzzian	B4	CLC0292	Bos/Bison	1105.6	1192.7	1208.7	1427.8	1580.8	1648.9	2131.1		2853.6	2869.6	3018	3034.7
G13I	RPI	12 UPPER	Uluzzian	B4	CLC0293	Equus sp.	1105.6	1182.6	1198.6	1427.7	1550.8	1650.8	2145.1	2821.1	2883.5	2899.5		2999.6
G13I	RPI	12 UPPER	Uluzzian	B4	CLC0294	Equus sp.	1105.6	1182.6	1199.6	1427.7	1550.6	1650.5	2144.5	2820.6	2882			2999
G14II	RPI	12 UPPER	Uluzzian	B4	CLC0295	Bos/Bison	1105.6	1192.6	1208.6	1427.6	1580.6	1648.6	2130.5	2792.5	2852	2869	3017.2	3033
G14II	RPI	12 UPPER	Uluzzian	B4	CLC0296	Equus sp.	1105.6			1427.8			2144.5		2883		2983.6	2999
G14II	RPI	12 UPPER	Uluzzian	B4	CLC0297	Equus sp.	1105.6	1182.6	1199.6	1427.7	1550.8	1650.8	2144.8	2819.8	2882	2899	2983	2999.2
G14II	RPI	12 UPPER	Uluzzian	B4	CLC0298	Capreolus capreolus	1105.6	1180.6	1196.6	1427.7	1550.6	1648.8	2131.1	2793	2883.5	2899.5	3044	3059
G14II	RPI	12 UPPER	Uluzzian	B4	CLC0299	Equus sp.	1105.6	1182.7	1199.6	1427.8	1550.8	1650.8	2145.2	2821	2883.6	2899.6	2984.7	2999.7
G14II	RPI	12 UPPER	Uluzzian	B4	CLC0300	Equus sp.	1105.6	1182.7	1198.7	1427.8	1550.8	1650.9	2145.2	2822	2883.6	2990	2984	2999.8
G14II	RPI	12 UPPER	Uluzzian	B4	CLC0301	Equus sp.	1105.6	1182.7	1198.6	1427.7	1550.8	1650.5	2145.2	2821	2883.6	2899.5	2983.5	2999.7
H13III	RPI	12 LOWER	Uluzzian	B4	CLC0302	Fail
H13III	RPI	12 LOWER	Uluzzian	B4	CLC0303	Equus sp.	1105.6	1182.6	1198.6	1427.7	1550.8	1650.8	2145.1	2821.1	2883.5	2899.5		2999.6
H13III	RPI	12 LOWER	Uluzzian	B4	CLC0304	Equus sp.	1105.6	1182.6	1198.6	1427.7	1550.8	1650.8	2145.1	2821.1	2883.5	2899.5		2999.6
H13III	RPI	12 LOWER	Uluzzian	B4	CLC0305	Fail
H12II + III	RPI	9 LOWER	Uluzzian	B4	CLC0306	Equus sp.	1105.5	1182.6	1198.6	1427.8	1550.8	1650.8	2145	2819.7	2882	2898		2999.5
H12II + III	RPI	9 LOWER	Uluzzian	B4	CLC0307	Bos/Bison	1105.5	1192.6	1208.6	1427.7	1580.7	1648.8	2131.1	2793.4	2853.5	2869.5	3018.5	3033.6
H12II + III	RPI	9 LOWER	Uluzzian	B4	CLC0308	Cervid	1105.6	1182.5	1197.6	1427.7	1550.7	1648.8	2131.1		2883.5	2899.5	3018.6	3033.6
H12II + III	RPI	9 LOWER	Uluzzian	B4	CLC0309	Equus sp.	1105.6	1182.6	1198.6	1427.7	1550.7	1650.8	2145.1	2821.5	2883.5	2899.5	2984.6	2999.6
H12II + III	RPI	9 LOWER	Uluzzian	B4	CLC0310	Equus sp.	1105.5	1182.6	1198.6	1427.7	1550.7	1650.7	2145.1	2822	2883.5	2899.5		2999.7
H12II + III	RPI	9 LOWER	Uluzzian	B4	CLC0311	Equus sp.	1105.6	1182.6	1198.7	1427.7	1550.6	1650.6	2144.5	2819.7	2883		2983.5	2998.5
H14III	RPI	13 UPPER	Uluzzian	B4	CLC0312	Equus sp.	1105.5	1182.6	1199.6	1427.7	1550.7	1650.7	2145.1	2821.4	2883.5	2899.6	2984	2999.6
H14III	RPI	13 UPPER	Uluzzian	B4	CLC0313	Equus sp.	1105.5	1182.6	1198.6	1427.7	1550.7	1650.7	2145.1	2821.4	2883.5	2899.6	2984	2999.6
H14III	RPI	13 UPPER	Uluzzian	B4	CLC0314	Equus sp.	1105.5	1182.6	1199.5	1427.7	1550.7	1650.7	2145.1	2821.4	2883.5	2899.6	2983	2999.6
E12II	RPI	13 LOWER	Uluzzian	B4	CLC0315	Cervid	1105.6	1182.6		1427.7	1550.7	1648.8	2131.1	2793.4	2883.5	2899.5	3018.6	3033.6
E12II	RPI	13 LOWER	Uluzzian	B4	CLC0316	Cervid	1105.6	1180.7	1196.7	1427.7	1550.7	1648.8	2131.1	2793.4	2883.5	2899.5	3018.6	3033.6
E12II	RPI	13 LOWER	Uluzzian	B4	CLC0317	Fail
H13II	RPI	13 LOWER	Uluzzian	B4	CLC0318	Rupicapra	1105.6	1180.6	1196.6	1427.7	1580.7	1648.8	2131.1	2793	2883.5	2899.5	3018.6	3033.6
H13II	RPI	13 LOWER	Uluzzian	B4	CLC0319	Equus sp.	1105.6	1182.6	1198.6	1427.7	1550.7	1650.8	2145.1	2821.5	2883.5	2899.5	2984.6	2999.6
H13II	RPI	13 LOWER	Uluzzian	B4	CLC0320	Fail				1453.7
H13III	RPI	13 UPPER	Uluzzian	B4	CLC0321	Fail
H13III	RPI	13 UPPER	Uluzzian	B4	CLC0322	Fail
H13III	RPI	13 UPPER	Uluzzian	B4	CLC0323	Unidentified Caprines	1105.6	1180.5		1427.6	1580.7	1648.8	2131.1	2793.3	2883.8
G13	RPI	12 UPPER	Uluzzian	B4	CLC0324	Fail
G13	RPI	12 UPPER	Uluzzian	B4	CLC0325	Equus sp.	1105.5	1182.6	1199.5	1427.7	1550.7	1650.7	2145.1	2821.4	2883.5	2899.6	2983	2999.6
G13	RPI	12 UPPER	Uluzzian	B4	CLC0326	Equus sp.	1105.5	1182.6	1199.5	1427.7	1550.7	1650.7	2145.1	2821.4	2883.5	2899.6	2983	2999.6
G14II	RPI	12 UPPER	Uluzzian	B5	CLC0327.1	Equus sp.	1105.6	1182.6	1198.6	1427.6	1550.6	1650	2144.5	2819.7	2883	2899	2983.5	2999.7
G14II	RPI	12 UPPER	Uluzzian	B5	CLC0327.2	Bos/Bison	1105.6	1192.6	1208.6	1427.6	1580.6	1648.6	2130.4	2792	2852.7	2868	3017.2	3033.5
G12IV	RPI	13 UPPER	Uluzzian	B5	CLC0328	Cervid	1105.6	1180.5	1197.6	1427.7	1550.7	1648.7	2130.6	2792	2883	2898	3017	3033.6
H14	RPI	13 LOWER	Uluzzian	B5	CLC0329.1	Capra sp.	1105.6	1180.5	1196.6	1427.7	1580.6	1648.7	2130.6	2792	2883	2898		3093.5
H14	RPI	13 LOWER	Uluzzian	B5	CLC0329.2	Equus sp.	1105.6	1182.6	1198.6	1427.7	1550.7	1650.6	2144.5	2819.6	2882.7	2899	2983	2999.3
H13III	RSA'	10 UPPER	Protoaurignacian	B5	CLC0330.1	Equus sp.	1105.6	1182.6	1198.6	1427.6	1550.6	1650.5	2145.3	2819.6	2883	2899	2983.3	2999.3
H13III	RSA'	10 UPPER	Protoaurignacian	B5	CLC0330.2	Bos/Bison	1105.6	1192.6	1208.7	1427.6	1580.6	1648.6	2130.5	2792.5	2853	2868.5	3017.2	3033
H13III	RSA'	10 UPPER	Protoaurignacian	B5	CLC0330.3	Equus sp.	1105.6	1182.6	1199	1427.6	1550.6	1650.5	2145	2820	2882.9	2898	2983	2999.6
H13III	RSA'	10 UPPER	Protoaurignacian	B5	CLC0330.4	Equus sp.	1105.6	1182.6	1199	1427.6	1550.6	1650.5	2145	2820	2882.9	2898	2983	2999.6
H13III	RSA'	10 UPPER	Protoaurignacian	B5	CLC0330.5	Equus sp.	1105.6	1182.6	1199.5	1427.6	1550.5	1650.4	2145	2819.5	2883	2899	2983	2999
H13III	RSA'	10 UPPER	Protoaurignacian	B5	CLC0330.6	Equus sp.	1105.6	1182.6	1198.6	1427.6	1550.6	1650	2144.5	2819.7	2883	2899	2983.5	2999.7
H13III	RSA'	10 UPPER	Protoaurignacian	B5	CLC0330.7	Equus sp.	1105.6	1182.6	1198.6	1427.6	1550.6	1650	2144.5	2819.7	2883	2899	2983.5	2999.7
H13IV	RSA'	10 LOWER	Protoaurignacian	B5	CLC0331.1	Bos/Bison	1105.6	1192.6	1208.6	1427.6	1580.6	1648.6	2130.4	2792	2852.7	2868	3017.2	3033.5
H13IV	RSA'	10 LOWER	Protoaurignacian	B5	CLC0331.2	Equus sp.	1105.6	1182.6	1198.6	1427.6	1550.6	1650	2144.5	2819.7	2883	2899	2983.5	2999.7
H13IV	RSA'	10 LOWER	Protoaurignacian	B5	CLC0331.3	Equus sp.	1105.6	1182.6	1198.6	1427.7	1550.7	1650.6	2144.5	2819.6	2882.7	2899		2999.3
H13IV	RSA'	10 LOWER	Protoaurignacian	B5	CLC0331.4	Equus sp.	1105.6	1182.6	1198.6	1427.7	1550.7	1650.6	2145	2820.3	2883.4	2899.4	2983.5	2999.6
H13IV	RSA'	10 LOWER	Protoaurignacian	B5	CLC0331.5	Fail
H13IV	RSA'	10 LOWER	Protoaurignacian	B5	CLC0331.6	Equus sp.	1105.6	1182.6	1198.6	1427.6	1550.6	1650.5	2145.5	2820.7	2883.5	2898	2984	2999.6
H13IV	RSA'	10 LOWER	Protoaurignacian	B5	CLC0331.7	Equus sp.	1105.6	1182.6	1198.6	1427.6	1550.6	1650.5	2145.5	2820.7	2883.5	2898	2984	2999.6
H13IV	RSA'	10 LOWER	Protoaurignacian	B5	CLC0331.8	Equus sp.	1105.6	1182.7		1427.7	1550.7	1650.6	2144.5	2820.7	2883			2999
H13IV	RSA'	10 LOWER	Protoaurignacian	B5	CLC0331.9	Bos/Bison	1105.6	1192.7	1208.7	1427.7	1580.6	1648.6	2131.5	2792	2852.8	2868.5	3017.3	3033.5
H13IV	RSA'	10 LOWER	Protoaurignacian	B5	CLC0331.10	Capra sp.	1105.6	1180.6	1197.7	1427.7	1580.6	1648.6	2131.5	2792	2883	2898	3077.3	3093.1
H13IV	RSA'	10 LOWER	Protoaurignacian	B5	CLC0331.11	Equus sp.	1105.6	1182.6	1198.6	1427.6	1550.6	1650.5	2145.5	2820.7	2883.5	2898	2984	2999.6
H13IV	RSA'	10 LOWER	Protoaurignacian	B5	CLC0331.12	Cervid	1105.6	1180.6	1196.6	1427.6	1550.6	1648.6	2130.5	2792	2883	2898.5	3017	3033.3
H13IV	RSA'	10 LOWER	Protoaurignacian	B5	CLC0331.13	Equus sp.	1105.6	1182.6	1199.7	1427.6	1550.6	1650.5	2145.5	2820.7	2883.5	2898	2984	2999.6
H14IV	RSA'	10 LOWER	Protoaurignacian	B5	CLC0332.1	Equus sp.	1105.6	1182.6	1199.7	1427.6	1550.6	1650.5	2145.5	2820.7	2883.5	2898	2984	2999.6
H14IV	RSA'	10 LOWER	Protoaurignacian	B5	CLC0332.2	Equus sp.	1105.6	1182.6	1199.7	1427.6	1550.6	1650.5	2145.5	2820.7	2883.5	2898	2984	2999.6
H14IV	RSA'	10 LOWER	Protoaurignacian	B5	CLC0332.3	Equus sp.	1105.6	1182.6	1199.7	1427.6	1550.6	1650.5	2145.5	2820.7	2883.5	2898	2984	2999.6
H14IV	RSA'	10 LOWER	Protoaurignacian	B5	CLC0332.4	Cervid	1105.6	1180.6	1196.6	1427.7	1550.8	1648.8	2131.2	2793	2883.7	2899.7	3017.8	3033.8
H14IV	RSA'	10 LOWER	Protoaurignacian	B5	CLC0332.5	Equus sp.	1105.6	1182.6	1198.6	1427.6	1550.6	1650.5	2145.5	2820.7	2883.5	2898	2984	2999.6
H14IV	RSA'	10 LOWER	Protoaurignacian	B5	CLC0332.6	Equus sp.	1105.6	1182.6	1198.6	1427.6	1550.6	1650.5	2145.5	2820.7	2883.5	2898	2984	2999.6
H14IV	RSA'	10 LOWER	Protoaurignacian	B5	CLC0332.7	Equus sp.	1105.6	1182.6	1198.6	1427.6	1550.6	1650.5	2145.5	2820.7	2883.5	2898	2984	2999.6
H14IV	RSA'	10 LOWER	Protoaurignacian	B5	CLC0332.8	Fail
H14IV	RSA'	10 LOWER	Protoaurignacian	B5	CLC0332.9	Equus sp.	1105.6	1182.6	1198.6	1427.6	1550.6	1650.5	2145.5	2820.7	2883.5	2898	2984	2999.6
H14IV	RSA'	10 LOWER	Protoaurignacian	B5	CLC0332.10	Equus sp.	1105.6	1182.6		1427.6	1550.6	1650.5	2145.5	2820.7	2883.5	2898	2984	2999.6
H14IV	RSA'	10 LOWER	Protoaurignacian	B5	CLC0332.11	Equus sp.	1105.6	1182.6	1198.6	1427.6	1550.6	1650.5	2145.5	2820.7	2883.5	2898	2984	2999.6
H14I	RSA'	10 LOWER	Protoaurignacian	B5	CLC0333.1	Equus sp.	1105.6	1182.6	1199.7	1427.6	1550.6	1650.5	2145.5	2820.7	2883.5	2898	2984	2999.6
H14I	RSA'	10 LOWER	Protoaurignacian	B5	CLC0333.2	Equus sp.	1105.6	1182.6	1199.7	1427.6	1550.6	1650.5	2145.5	2820.7	2883.5	2898	2984	2999.6
H14I	RSA'	10 LOWER	Protoaurignacian	B5	CLC0333.3	Equus sp.	1105.6	1182.6	1199.7	1427.6	1550.6	1650.5	2145.5	2820.7	2883.5	2898	2984	2999.6
H14I	RSA'	10 LOWER	Protoaurignacian	B5	CLC0333.4	Bos/Bison	1105.6	1192.6	1208.6	1427.7	1580.7	1648.7	2131.1	2792.5	2853.6	2869.6	3017	3033.8
H14I	RSA'	10 LOWER	Protoaurignacian	B5	CLC0333.5	Bos/Bison	1105.6	1192.6	1208.7	1427.6	1580.6	1648.6	2130.4	2792	2853	2898	3017.3	3033.2
H13III	RSA'	10 UPPER	Protoaurignacian	B5	CLC0334.1	Equus sp.	1105.6	1182.6	1198.6	1427.6	1550.6	1650.5	2144.5	2819.6	2883	2898.5	2983	2999.4
H13III	RSA'	10 UPPER	Protoaurignacian	B5	CLC0334.2	Bos/Bison	1105.6	1192.6	1208.7	1427.6	1580.6	1648.6	2130.4	2792	2853	2898	3017.3	3033.2
H13III	RSA'	10 UPPER	Protoaurignacian	B5	CLC0334.3	Bos/Bison	1105.6	1192.7	1208.7	1427.7	1580.6	1648.2	2130.5	2792	2853	2868.5	3017.3	3033.5
H13III	RSA'	10 UPPER	Protoaurignacian	B5	CLC0334.4	Bos/Bison	1105.6	1192.7	1208.7	1427.7	1580.6	1648.2	2130.5	2792	2853	2868.5	3017.3	3033.5
H13III	RSA'	10 UPPER	Protoaurignacian	B5	CLC0334.5	Equus sp.	1105.6	1182.6	1199.6	1427.6	1550.6	1649.6	2145	2819.7	2883	2898	2982.5	2999
H13III	RSA'	10 UPPER	Protoaurignacian	B5	CLC0334.6	Bos/Bison	1105.6	1192.7	1208.7	1427.6	1580.6	1648.6	2130.6	2791.7	2853	2868.5	3018.3	3033.4
H13III	RSA'	10 UPPER	Protoaurignacian	B5	CLC0334.7	Fail
H13II	RSA'	10 UPPER	Protoaurignacian	B5	CLC0335.1	Capra sp.	1105.6	1180.5	1197.5	1427.7	1580.7	1648.8	2131	2793.3	2883.3	2899.4	3078	3093.5
H13II	RSA'	10 UPPER	Protoaurignacian	B5	CLC0335.2	Equus sp.	1105.6	1182.6	1198.6	1427.7	1550.8	1650.8	2145.1	2821.5	2883.5	2899.5		3000
H13II	RSA'	10 UPPER	Protoaurignacian	B5	CLC0335.3	Equus sp.	1105.6	1182.6	1199.6	1427.6	1550.6	1649.6	2145	2819.7	2883	2898	2982.5	2999
H13II	RSA'	10 UPPER	Protoaurignacian	B5	CLC0335.4	Bos/Bison	1105.6		1208.7	1427.7	1580.6	1648.2	2130.5
H13II	RSA'	10 UPPER	Protoaurignacian	B5	CLC0335.5	Capra sp.	1105.6	1180.5	1196.6	1427.6	1580.6	1648.6	2130.4	2792	2883	2898	3077	3093.1
H13II	RSA'	10 UPPER	Protoaurignacian	B5	CLC0335.6	Cervid	1105.6	1180.6	1196.6	1427.6	1550.6	1648.6	2130.4	2792	2883	2899	3017.3	3033.2
H14I	RSA'	10 LOWER	Protoaurignacian	B5	CLC0336.1	Cervid	1105.6	1180.6	1196.6	1427.6	1550.6	1648.6	2130.4	2792	2883	2899	3017.3	3033.2
H14I	RSA'	10 LOWER	Protoaurignacian	B5	CLC0336.2	Equus sp.	1105.6	1182.6	1198.6	1427.6	1550.5	1650.5	2144.5	2819.6	2883	2898	2983	2999.1
H14I	RSA'	10 LOWER	Protoaurignacian	B5	CLC0336.3	Equus sp.	1105.6	1182.6	1198.6	1427.6	1550.5	1650.5	2144.5	2819.6	2883	2898	2983	2999.1
H14I	RSA'	10 LOWER	Protoaurignacian	B5	CLC0336.4	Bos/Bison	1105.6	1192.7	1208.7	1427.6	1580.6	1648.6	2130.6	2791.7	2853	2868.5	3018.3	3033.4
H14I	RSA'	10 LOWER	Protoaurignacian	B5	CLC0336.5	Equus sp.	1105.6	1182.6	1198.6	1427.6	1550.6	1650.6	2144.5		2883	2898		2998.5
H14I	RSA'	10 LOWER	Protoaurignacian	B5	CLC0336.6	Equus sp.	1105.6	1182.6	1199.6	1427.6	1550.6	1649.6	2145	2819.7	2883	2898	2982.5	2999
H14I	RSA'	10 LOWER	Protoaurignacian	B5	CLC0336.7	Bos/Bison	1105.6	1192.6	1208.6	1427.7	1580.7	1648.8	2131	2793.3	2853.5	2869.5	3018.5	3033.6
H14I	RSA'	10 LOWER	Protoaurignacian	B5	CLC0336.8	Bos/Bison	1105.6	1192.7	1208.7	1427.6	1580.6	1648.6	2130.6	2791.7	2853	2868.5	3018.3	3033.4
H13IV	RSA'	10 UPPER	Protoaurignacian	B5	CLC0337.1	Cervid	1105.5	1180.6	1196.6	1427.7	1550.8	1648.8	2131.1	2793.3	2883.4	2899.4	3018.4	3033.5
H13IV	RSA'	10 UPPER	Protoaurignacian	B5	CLC0337.2	Cervid	1105.6	1180.6	1196.6	1427.6	1550.6	1648.6	2131.6	2792.7	2882.5	2898.5	3017.2	3033.3
H13IV	RSA'	10 UPPER	Protoaurignacian	B5	CLC0337.3	Cervid	1105.6	1180.6	1196.6	1427.6	1550.6	1648.6	2131.6	2792.7	2882.5	2898.5	3017.2	3033.3
H13IV	RSA'	10 UPPER	Protoaurignacian	B5	CLC0337.4	Bos/Bison	1105.6	1192.7	1208.7	1427.7	1580.6	1648.6	2130.5	2792.7	2853.7	2868.6	3018.4	3033.4
H13IV	RSA'	10 UPPER	Protoaurignacian	B5	CLC0337.5	Cervid	1105.6	1180.6	1196.6	1427.6	1550.6	1648.6	2131.6	2792.7	2882.5	2898.5	3017.2	3033.3
H13IV	RSA'	10 UPPER	Protoaurignacian	B5	CLC0337.6	Bos/Bison	1105.6	1192.7	1208.7	1427.7	1580.6	1648.6	2130.5	2792.7	2853.7	2868.6	3018.4	3033.4
H13IV	RSA'	10 UPPER	Protoaurignacian	B5	CLC0337.7	Equus sp.	1105.6	1182.6	1198.6	1427.6	1550.6	1650.5	2144.5	2820	2883	2898	2983	2999
H13IV	RSA'	10 UPPER	Protoaurignacian	B5	CLC0337.8	Equus sp.	1105.6	1182.6	1199.7	1427.7	1550.6	1650.5	2144.5	2819.6	2883	2898.6	2983	2999.4
H12I	RSA'	10 UPPER	Protoaurignacian	B5	CLC0338.1	Cervid	1105.6	1180.6	1196.6	1427.6	1550.6	1648.6	2131.6	2792.7	2882.5	2898.5	3017.2	3033.3
H12I	RSA'	10 UPPER	Protoaurignacian	B5	CLC0338.2	Equus sp.	1105.6	1182.6	1199.8	1427.7	1550.6		2144.5	2820.9	2882.5	2898.4	2983.5	2999.7
H12I	RSA'	10 UPPER	Protoaurignacian	B5	CLC0338.3	Equus sp.	1105.6	1182.6	1199.8	1427.7	1550.6	1650.7	2145.1	2820.9	2882.5	2898.4	2983.5	2999.7
H12I	RSA'	10 UPPER	Protoaurignacian	B5	CLC0338.4	Bos/Bison	1105.6	1192.7	1208.7	1427.8	1580.6	1648.9	2131.2	2793	2853.6	2869.6	3018.7	3033.8
H12I	RSA'	10 UPPER	Protoaurignacian	B5	CLC0338.5	Bos/Bison	1105.6	1192.7	1208.7	1427.7	1580.6	1648.6	2130.5	2792.7	2853.7	2868.6	3018.4	3033.4
H14III	RSA'	10 UPPER	Protoaurignacian	B5	CLC0339.1	Fail
H14III	RSA'	10 UPPER	Protoaurignacian	B5	CLC0339.2	Equus sp.	1105.6	1182.6	1199.8	1427.7	1550.6	1650.6	2144.5	2820.9	2882.5	2898.4	2983.5	2999.7
H14III	RSA'	10 UPPER	Protoaurignacian	B5	CLC0339.3	Equus sp.	1105.6	1182.6	1199.8	1427.7	1550.6	1650.6	2144.5	2820.9	2882.5	2898.4	2983.5	2999.7
H14III	RSA'	10 UPPER	Protoaurignacian	B6	CLC0339.4	Fail
H14III	RSA'	10 UPPER	Protoaurignacian	B6	CLC0339.5	Equus sp.	1105.6	1182.6	1199	1427.7	1550.7	1650.7			2883.8
H12IV	RSA'	10 UPPER	Protoaurignacian	B6	CLC0340.1	Bos/Bison	1105.6	1192.6	1208.6	1427.4	1580.7	1648.7	2130.6	2792.7	2853	2869	3017	3033.6
H12IV	RSA'	10 UPPER	Protoaurignacian	B6	CLC0340.2	Equus sp.	1105.6	1182.7	1198.7	1427.4	1550	1650.5	2144.5	2820	2883	2898	2983	2999.7
H12IV	RSA'	10 UPPER	Protoaurignacian	B6	CLC0340.3	Equus sp.	1105.6	1182.7	1198.7	1427.4	1550	1649.6	2144.5	2820	2883	2898	2983	2999.7
H12IV	RSA'	10 UPPER	Protoaurignacian	B6	CLC0340.4	Bos/Bison	1105.6	1192.5	1208.5	1427.3	1580.1	1648.1	2130	2792.3	2853	2868.5	3018.4	3033.6
H12IV	RSA'	10 UPPER	Protoaurignacian	B6	CLC0340.5	Equus sp.	1105.5	1182.6	1199.5	1427.7	1550.7	1650.6	2144.6	2819.7	2883	2898.5	2983	2999.1
H12IV	RSA'	10 UPPER	Protoaurignacian	B6	CLC0340.6	Equus sp.	1105.5	1182.6	1199.5	1427.7	1550.7	1650.6	2144.6	2819.7	2883	2898.5	2983	2999.1
H12IV	RSA'	10 UPPER	Protoaurignacian	B6	CLC0340.7	Bos/Bison	1105.6	1192.5	1208.5	1427.3	1580.1	1648.1	2131.5	2792.3	2853	2868.5	3017	3033.5
H12IV	RSA'	10 UPPER	Protoaurignacian	B6	CLC0340.8	Fail
G14III	RSA'	10 UPPER	Protoaurignacian	B6	CLC0341.1	Bos/Bison	1105.6	1192.5	1208.5	1427.3	1580.1	1648.1	2131.5	2792.3	2853	2868.5	3017	3033.5
G14III	RSA'	10 UPPER	Protoaurignacian	B6	CLC0341.2	Bos/Bison	1105.6	1192.5	1208.5	1427.3	1580.1	1648.1	2131.5	2792.3	2853	2868.5	3017	3033.5
G14III	RSA'	10 UPPER	Protoaurignacian	B6	CLC0341.3	Equus sp.	1105.5	1182.6	1199.5	1427.7	1550.7	1650.6	2144.9	2821	2883.1	2898.5		2999.1
G14III	RSA'	10 UPPER	Protoaurignacian	B6	CLC0341.4	Equus sp.	1105.6	1182.7	1198.7	1427.4	1550	1650.5	2144.5	2820	2883	2898	2983	2999.7
H14III	RSA'	10 LOWER	Protoaurignacian	B6	CLC0342.1	Equus sp.	1105.5	1182.6		1427.7	1550.7	1650.6	2144.6	2819.7	2883	2898.5		2999.1
H14III	RSA'	10 LOWER	Protoaurignacian	B6	CLC0342.2	Equus sp.	1105.5	1182.6	1199.6	1427.7	1550.7	1650.6	2144.6	2819.7	2883	2898.5	2983.4	2999.1
H14III	RSA'	10 LOWER	Protoaurignacian	B6	CLC0342.3	Bos/Bison	1105.6	1192.5	1208.5	1427.3	1580.1	1648.1	2130	2792.3	2853	2868.5	3017
H14III	RSA'	10 LOWER	Protoaurignacian	B6	CLC0342.4	Bos/Bison	1105.6	1192.5	1208.5	1427.3	1580.1	1648.1	2130	2792.3	2853	2868.5	3017	3033.5
H14III	RSA'	10 LOWER	Protoaurignacian	B6	CLC0342.5	Equus sp.	1105.5	1182.6	1199.5	1427.7	1550.7	1650.6	2144.6	2819.7	2883	2898.5	2983	2999.1
H14III	RSA'	10 LOWER	Protoaurignacian	B6	CLC0342.6	Equus sp.	1105.5	1182.6	1199.5	1427.7	1550.7	1650.6	2144.6	2819.7	2883	2898.5		2999.1
H14III	RSA'	10 LOWER	Protoaurignacian	B6	CLC0342.7	Equus sp.	1105.5	1182.6	1199.5	1427.7	1550.7	1650.6	2144.6	2819.7	2883	2898.5	2982.5	2999.1
H14III	RSA'	10 LOWER	Protoaurignacian	B6	CLC0342.8	Equus sp.	1105.5	1182.6	1199.5	1427.7	1550.7	1650.6	2144.6	2819.7	2883	2898.5	2982.5	2999.1
H12IV	RSA'	10 LOWER	Protoaurignacian	B6	CLC0343.1	Equus sp.	1105.5	1182.6	1199.5	1427.7	1550.7	1650.6	2144.6	2819.7	2883	2898.5		2999.1
H12IV	RSA'	10 LOWER	Protoaurignacian	B6	CLC0343.2	Equus sp.	1105.5	1182.6	1198.5	1427.7	1550.7	1650.6	2145.1	2819.7	2883	2899.9		2999.1
H12IV	RSA'	10 LOWER	Protoaurignacian	B6	CLC0343.3	Equus sp.	1105.5	1182.6	1198.5	1427.7	1550.7	1650.6	2145.1	2819.7	2883	2899.9		2999.1
H12IV	RSA'	10 LOWER	Protoaurignacian	B6	CLC0343.4	Fail
H12IV	RSA'	10 LOWER	Protoaurignacian	B6	CLC0343.5	Equus sp.	1105.6	1182.7	1198.7	1427.5	1550.1	1649.6	2145.7	2820.7	2882.8	2899
H12IV	RSA'	10 LOWER	Protoaurignacian	B6	CLC0343.6	Equus sp.	1105.6	1182.6	199.6	1427.7	1550.7	1650.7	2144.6	2819.7	2883	2898		2999
H12IV	RSA'	10 LOWER	Protoaurignacian	B6	CLC0343.7	Cervid	1105.6	1180.5	1196.5	1427.3	1550.6	1648.2	2130.1	2792.3	2883	2898.6	3017.6	3033.7
H14IV	RSA'	10 UPPER	Protoaurignacian	B6	CLC0344.1	Cervid	1105.6	1180.5	1196.5	1427.3	1550.6	1648.2	2130.1	2792.3	2883	2898.6	3017.6	3033.7
H14IV	RSA'	10 UPPER	Protoaurignacian	B6	CLC0344.2	Cervid	1105.6	1180.5	1196.5	1427.3	1550.6	1648.2	2130.1	2792.3	2883	2898.6	3017.6	3033.7
H14IV	RSA'	10 UPPER	Protoaurignacian	B6	CLC0344.3	Bos/Bison	1105.6	1192.7	1208.7	1427.7	1580.7	1648.7	2130.6	2791.7	2853	2868	3017
H14IV	RSA'	10 UPPER	Protoaurignacian	B6	CLC0344.4	Equus sp.	1105.6	1182.6	1199.6	1427.7	1550.7	1650.7	2144.6	2819.7	2883	2898		2999
F14	RSA'	9	Protoaurignacian	B7	CLC0346.1	Equus sp.	1105.6	1182.6	1198.6	1427.6	1550.6	1650.5	2144.4	2819.6	2883	2898		2999.1
F14	RSA'	9	Protoaurignacian	B7	CLC0346.2	Equus sp.	1105.6	1182.6	1198.6	1427.6	1550.6	1650.5	2143	2820	2883	2899		2999
F14	RSA'	9	Protoaurignacian	B7	CLC0346.3	Equus sp.	1105.6	1182.6	1198.6	1427.6	1550.6	1650.5	2143	2820	2883	2898	2983	2998
F14	RSA'	9	Protoaurignacian	B7	CLC0346.4	Equus sp.	1105.6	1182.6	1198.6	1427.6	1550.6	1650.5	2144.4	2820	2883.5	2899		2999.5
F14	RSA'	9	Protoaurignacian	B7	CLC0346.5	Equus sp.	1105.6	1182.6	1198.6	1427.6	1550.6	1650.5	2144.4	2820	2883.5	2899		2999.5
F14	RSA'	9	Protoaurignacian	B7	CLC0347.1	Equus sp.	1105.6	1182.6	1199.6	1427.7	1550.7	1650.7	2145	2822	2883.4
F14	RSA'	9	Protoaurignacian	B7	CLC0347.2	Fail
F14	RSA'	9	Protoaurignacian	B7	CLC0347.3	Equus sp.	1105.6	1182.6	1199.6	1427.7	1550.7	1650.7	2145.1	2822	2883.5	2899.5		2999
F14	RSA'	9	Protoaurignacian	B7	CLC0347.4	Fail
F14	RSA'	9	Protoaurignacian	B7	CLC0347.5	Bos/Bison	1105.5	1192.6	1208.6	1427.6	1580.6	1648.7	2131	2794	2853.5	2869.5	3019	3034
F14	RSA'	9	Protoaurignacian	B7	CLC0348.1	Equus sp.	1105.5	1182.6	1199.6	1427.7	1550.7	1650.7	2145.1		2883.6	2990		3000
F14	RSA'	9	Protoaurignacian	B7	CLC0348.2	Equus sp.	1105.6	1182.6	1199.6	1427.7	1550.7	1650.7	2145.1	2822	2883.5	2899.5		2999
F14	RSA'	9	Protoaurignacian	B7	CLC0348.3	Cervid	1105.6	1180.6	1196.6	1427.6	1550.5	1648.8	2130.4	2792.5	2883	2898	3017	3033
F14	RSA'	9	Protoaurignacian	B7	CLC0348.4	Equus sp.	1105.6	1182.6	1198.6	1427.6	1550.6	1650.5	2143	2820	2883	2898	2983	2999.4
F14	RSA'	9	Protoaurignacian	B7	CLC0348.5	Equus sp.	1105.6	1182.6	1198.6	1427.6	1550.6	1650.5	2144.4	2820	2883	2898	2983
F14	RSA'	9	Protoaurignacian	B7	CLC0348.6	Equus sp.	1105.6	1182.6	1198.6	1427.6	1550.6	1650.5	2144.4	2820	2883.5	2899	2983	2999.5
F14	RSA'	9	Protoaurignacian	B7	CLC0349.1	Equus sp.	1105.6	1182.6	1198.6	1427.6	1550.6	1650.5	2145	2820	2883.5	2899		2999.5
F14	RSA'	9	Protoaurignacian	B7	CLC0349.2	Fail
F14	RSA'	9	Protoaurignacian	B7	CLC0349.3	Equus sp.	1105.6	1182.6		1427.7			2145	2822.4	2883.5	2899.4		3000.6
F14	RSA'	9	Protoaurignacian	B7	CLC0349.4	Cervid	1105.6	1181	1196.6	1427.6	1550.5	1648.8	2130.4	2792.5	2883	2898	3017	3033
F14	RSA'	9	Protoaurignacian	B7	CLC0349.5	Cervid	1105.6	1180.6	1196.6	1427.6	1550.5	1648.8	2131.1	2792.5	2883.5	2899.5	3017	3033.7
F14	RSA'	9	Protoaurignacian	B7	CLC0350.1	Equus sp.	1105.6	1182.6	1198.5	1427.7	1550.7	1650.7	2145.1	2822	2883.5	2899.5
F14	RSA'	9	Protoaurignacian	B7	CLC0350.2	Equus sp.	1105.6	1182.6	1199.6	1427.7	1550.7	1650.7	2145.1	2822	2883.5	2899.5		2999
F14	RSA'	9	Protoaurignacian	B7	CLC0350.3	Equus sp.	1105.6	1182.6	1198.6	1427.7	1550.6	1650.5	2144.5	2819.6	2883	2898	2983.5	2999
F14	RSA'	9	Protoaurignacian	B7	CLC0350.4	Equus sp.	1105.6	1182.6	1198.6	1427.7	1550.6	1650.5	2144.5	2819.6	2883	2898		2999
F14	RSA'	9	Protoaurignacian	B7	CLC0350.5	Rupicapra	1105.6	1181.6	1196.6	1427.7	1580.7	1648.7	2131	2792	2882	2898	3017
F14	RSA'	9	Protoaurignacian	B7	CLC0350.6	Cervid	1105.6	1180.6	1196.6	1427.7	1550.7	1645.8	2131.1	2793	2883.5	2899.5	3019	3034.6
F14	RSA'	9	Protoaurignacian	B7	CLC0350.7	Equus sp.	1105.6	1182.6	1198.6	1427.7	1550.6	1650.5	2144.5	2819.6	2883	2898		2999
F14	RSA'	9	Protoaurignacian	B7	CLC0350.8	Bos/Bison	1105.6	1193.6	1208.7	1427.7	1580.8	1648.8	2131.1	2793	2853.5	2869.7	3018.5	3034.6
H14III	RSA'	9	Protoaurignacian	B7	CLC0351.1	Bos/Bison	1105.6	1193.6	1208.7	1427.7	1580.8	1648.8	2131.1	2793	2853.5	2869.7	3018.5	3034.6
H14III	RSA'	9	Protoaurignacian	B7	CLC0351.2	Unidentified Deer	1105.6	1181	1197.7	1427.8	1550.8	1648.9	2131.1		2883.9	2899.7
H14III	RSA'	9	Protoaurignacian	B7	CLC0351.3	Bos/Bison	1105.6	1193.6	1208.7	1427.7	1580.8	1648.8	2131.1	2793	2853.5	2869.7	3018.5	3034.6
H14III	RSA'	9	Protoaurignacian	B7	CLC0351.4	Equus sp.	1105.6	1182.6	1198.6	1427.7	1550.7	1650.7	2145.1		2883.6	2899.6
H14III	RSA'	9	Protoaurignacian	B7	CLC0351.5	Equus sp.	1105.6	1182.6	1199.6	1427.7	1550.8	1650.8	2145.2		2883.8	2899.8		3000.4
H12IV	RSA'	9	Protoaurignacian	B7	CLC0352.1	Bos/Bison	1105.6	1193.6	1208.7	1427.7	1580.8	1648.8	2130.8	2792.6	2853.5	2869.5	3017.6	3034.6
H12IV	RSA'	9	Protoaurignacian	B7	CLC0352.2	Equus sp.	1105.6	1182.6	1198.6	1427.7	1550.6	1650.5	2144.5	2819.6	2883	2898	2983.5	2999
H12IV	RSA'	9	Protoaurignacian	B7	CLC0352.3	Fail
H12IV	RSA'	9	Protoaurignacian	B7	CLC0352.4	Equus sp.	1105.6	1182.6	1198.6	1427.7	1550.6	1650.5	2144.5	2819.6	2883	2898	2983.5	2999
H12IV	RSA'	9	Protoaurignacian	B7	CLC0352.5	Equus sp.	1105.6	1182.6	1198.6	1427.7	1550.6	1650.5	2144.5	2819.6	2883	2898		2999
H12IV	RSA'	9	Protoaurignacian	B7	CLC0352.6	Equus sp.	1105.6	1182.6	1198.6	1427.7	1550.6	1650.5	2144.5	2819.6	2883	2898		2999
G13	RSA'	9	Protoaurignacian	B7	CLC0353.1	Bos/Bison	1105.6	1193.6	1208.7	1427.7	1580.8	1648.8	2131.1	2793	2853.5	2869.7	3018.5	3034.6
G13	RSA'	9	Protoaurignacian	B7	CLC0353.2	Bos/Bison	1105.6	1193.6	1208.7	1427.7	1580.8	1648.8	2131.1	2793	2853.5	2869.7	3018.5	3034.6
G13	RSA'	9	Protoaurignacian	B7	CLC0353.3	Bos/Bison	1105.6	1193.6	1208.7	1427.7	1580.8	1648.8	2131.1	2793	2853.5	2869.7	3018.5	3034.6
G13	RSA'	9	Protoaurignacian	B7	CLC0353.4	Rupicapra	1105.6	1180.6	1197.7	1427.8	1580.8	1648.9	2131.1	2793	2883.9	2899.7	3019.7
G13	RSA'	9	Protoaurignacian	B7	CLC0353.5	Equus sp.	1105.6	1182.6	1198.6	1427.7	1550.7	1650.7	2146		2883.6
G13	RSA'	9	Protoaurignacian	B7	CLC0354.1	Equus sp.	1105.6	1182.6	1198.6	1427.7	1550.7	1650.7	2144.8	2820.6	2883			2999.6
G13	RSA'	9	Protoaurignacian	B7	CLC0354.2	Equus sp.	1105.5	1182.6		1427.7	1550.7	1650.7	2145	2821	2883.4	2899.4		3000
G13	RSA'	9	Protoaurignacian	B7	CLC0354.3	Cervid	1105.5	1180.6	1197.6	1427.7	1550.7	1648.8	2131.1	2793	2883.4	2899.4	3018
G13	RSA'	9	Protoaurignacian	B7	CLC0354.4	Equus sp.	1105.5	1182.6	1199.5	1427.7	1550.7	1650.7	2145	2821	2883.4	2899.4
G13	RSA'	9	Protoaurignacian	B7	CLC0354.5	Bos/Bison	1105.4	1192.5	1208.5	1427.5	1580.6	1648.8	2130.9	2792.3	2853.4	2869.4	3019.5	3033.6
G13	RSA'	9	Protoaurignacian	B7	CLC0355.1	Equus sp.	1105.5	1182.6	1198.5	1427.7	1550.7	1650.7	2145	2820	2883.4	2899.4		3000
G13	RSA'	9	Protoaurignacian	B7	CLC0355.2	Bos/Bison	1105.5	1192.6	1208.6	1427.6	1580.7	1648	2131.1	2793	2853.5	2869.5	3019.6	3033.7
G13	RSA'	9	Protoaurignacian	B7	CLC0355.3	Equus sp.	1105.5	1182.5	1198.8	1427.7	1550.6	1650.7	2145.1	2821	2883.7	2899.7		3000
G13	RSA'	9	Protoaurignacian	B7	CLC0355.4	Fail
G13	RSA'	9	Protoaurignacian	B7	CLC0355.5	Bos/Bison	1105.5	1192.6	1208.6	1427.6	1580.7	1648	2131.1	2793	2853.5	2869.5	3019.6	3033.7
G13	RSA'	9	Protoaurignacian	B7	CLC0356.1	Equus sp.	1105.5	1182.5	1199.8	1427.7	1550.6	1650.7	2145.1	2821	2883.7	2899.7		2999.1
G13	RSA'	9	Protoaurignacian	B7	CLC0356.2	Equus sp.	1105.5	1182.5	1199.8	1427.7	1550.6	1650.7	2145.1	2821	2883.7	2899.7		2999.1
G13	RSA'	9	Protoaurignacian	B7	CLC0356.3	Equus sp.	1105.5	1182.6	1199.6	1427.7	1550.7	1650.7	2145	2821	2883.4	2899.4		3000
G13	RSA'	9	Protoaurignacian	B7	CLC0356.4	Cervid	1105.5	1180.6	1196.5	1427.7	1550.7	1648.7	2131	2793	2883.5	2899.5	3018	3034.6
G13	RSA'	9	Protoaurignacian	B7	CLC0356.5	Cervid	1105.5	1180.6	1197.6	1427.7	1550.7	1648.8	2131.1	2793	2883.4	2899.4	3018	3034.7
G13	RSA'	9	Protoaurignacian	B7	CLC0356.6	Equus sp.	1105.5	1182.6	1198.5	1427.7	1550.7	1650.7	2145		2883.4
G14	RSA'	9 Upper/Lower	Protoaurignacian	B7	CLC0357.1	Fail
G14	RSA'	9 Upper/Lower	Protoaurignacian	B7	CLC0357.2	Rupicapra	1105.5	1180.6	1196.6	1427.7	1580.7	1648.8	2131.1	2793	2883.4	2899.4	3018.6
G14	RSA'	9 Upper/Lower	Protoaurignacian	B7	CLC0357.3	Cervid	1105.5	1180.6	1196.6	1427.7	1550.8	1648.8	2131.1	2793	2883.4	2899.4	3018.6	3034.9
G14	RSA'	9 Upper/Lower	Protoaurignacian	B7	CLC0357.4	Equus sp.	1105.5	1182.5	1198.8	1427.7	1550.6	1650.7	2145.1	2821	2883.7	2899.7
G14	RSA'	9 Upper/Lower	Protoaurignacian	B7	CLC0357.5	Fail
G14	RSA'	9 Upper/Lower	Protoaurignacian	B7	CLC0358.1	Bos/Bison	1105.5	1192.6	1208.6	1427.6	1580.7	1648	2131.1	2793	2853.5
G14	RSA'	9 Upper/Lower	Protoaurignacian	B7	CLC0358.2	Equus sp.	1105.6	1182.6	1199.6	1427.8	1550.7	1650.7			2883
G14	RSA'	9 Upper/Lower	Protoaurignacian	B7	CLC0358.3	Capra sp.	1105.6	1181.7	1196.7	1427.8	1580.8	1648.9	2130.7		2883	2898	3077.6	3093.4
G14	RSA'	9 Upper/Lower	Protoaurignacian	B7	CLC0358.4	Equus sp.	1105.6	1182.6	1198.6	1427.7	1550.7	1650.7	2145	2821.4	2883.5	2898.5
G14	RSA'	9 Upper/Lower	Protoaurignacian	B7	CLC0358.5	Bos/Bison	1105.6	1192.6	1208.7	1427.7	1580.8	1648.8	2131.1		2853.5	2869.5	3018.5
G14	RSA'	9 Upper/Lower	Protoaurignacian	B7	CLC0359.1	Fail
G14	RSA'	9 Upper/Lower	Protoaurignacian	B7	CLC0359.2	Rupicapra	1105.6	1180.5	1196.5	1427.6	1580.6	1648.7	2131	2793	2883.5	2899.5	3018.5
G14	RSA'	9 Upper/Lower	Protoaurignacian	B7	CLC0359.3	Unidentified Caprines	1105.5	1180.6	1194.6	1427.7	1580.7	1648.7	2131.1		2883.7	2899.7
G14	RSA'	9 Upper/Lower	Protoaurignacian	B7	CLC0359.4	Fail
G14	RSA'	9 Upper/Lower	Protoaurignacian	B7	CLC0360.1	Panthera/Crocuta	1105.5	1207		1453.7	1566		2147.1		2853.8	2869.8
G14	RSA'	9 Upper/Lower	Protoaurignacian	B7	CLC0360.2	Unidentified Caprines	1105.5	1181.6	1196.6	1427.7	1580.8	1648.8	2131.2	2792.7	2883.9	2899.9
G14	RSA'	9 Upper/Lower	Protoaurignacian	B7	CLC0360.3	Equus sp.	1105.6	1182.6	1198.6	1427.7	1550.7
G14	RSA'	9 Upper/Lower	Protoaurignacian	B7	CLC0360.4	Equus sp.	1105.5	1182.6	1199.6	1427.7	1550.7	1650.7	2144.9	2821.1	2883.2	2899.2
G14	RSA'	9 Upper/Lower	Protoaurignacian	B7	CLC0360.5	Fail
G14	RSA'	9 Upper/Lower	Protoaurignacian	B7	CLC0361.1	Fail
G14	RSA'	9 Upper/Lower	Protoaurignacian	B7	CLC0361.2	Bos/Bison	1105.5	1192.6	1208.7	1427.7	1580.8	1648.8	2131.1		2853.5	2869.5	3018.5	3034
G14	RSA'	9 Upper/Lower	Protoaurignacian	B7	CLC0361.3	Bos/Bison	1105.5	1192.6	1208.7	1427.7	1580.8	1648.8	2131.1		2853.5	2869.5	3019
G14	RSA'	9 Upper/Lower	Protoaurignacian	B7	CLC0361.4	Cervid	1105.6	1180.5	1197.5	1427.7	1550.7	1648.7	2131.1	2793	2883.6	2899.6	3018	3033.7
G14	RSA'	9 Upper/Lower	Protoaurignacian	B7	CLC0361.5	Bos/Bison	1105.5	1192.6	1208.6	1427.7	1580.7	1648.8	2131.1	2793	2853.6	2869.6	3019	3033.7
G14	RSA'	9 Upper/Lower	Protoaurignacian	B7	CLC0362.1	Fail
G14	RSA'	9 Upper/Lower	Protoaurignacian	B7	CLC0362.2	Bos/Bison	1105.6	1192.6	1208.6	1427.7	1580.7	1648.8	2131.2	2792	2853.8	2869.8	3019
G14	RSA'	9 Upper/Lower	Protoaurignacian	B7	CLC0362.3	Bos/Bison	1105.5	1192.6	1208.6	1427.7	1580.7	1648.8	2131.1	2793	2853.7	2869.8	3019	3033.9
G14	RSA'	9 Upper/Lower	Protoaurignacian	B7	CLC0362.4	Equus sp.	1105.6	1182.6		1427.8	1550.8	1650.8	2145.3	2821	2883.9	2899.9		3000
E13 I-II	GAR	27-28	Mousterian	B8	CLC0363	Cervid	1105.6	1181	1196	1427.7	1550.7	1648.7	2130.7	2792	2883	2898	3019	3032
E13 I-II	GAR	27-28	Mousterian	B8	CLC0364	Cervid	1105.5	1180.6	1197.6	1427.6	1550.5	1648.5	2130.4	2792.5	2883	2898	3017
E13 I-II	GAR	27-28	Mousterian	B8	CLC0365	Cervid	1105.5	1180.6	1197	1427.7	1550.7	1648.7	2130.9	2793.1	2883.2	2899.2	3018	3033
E13 I-II	GAR	27-28	Mousterian	B8	CLC0366	Cervid	1105.5	1180.5	1197	1427.6	1550.7	1648.8	2131.1	2793	2883.9	2899.9	3017	3033
E13 I-II	GAR	27-28	Mousterian	B8	CLC0367	Rupicapra	1105.5	1181	1197.6	1427.7	1580.6	1648.6	2130	2791	2882	2898	3017	3032
E13 I-II	GAR	28	Mousterian	B8	CLC0368	Cervid	1105.5	1180.6	1197	1427.7	1550.7	1648.7	2130.9	2793	2883.2	2899.2	3019.1	3034.3
E13 I-II	GAR	28	Mousterian	B8	CLC0369	Cervid	1105.5	1180.6	1196.6	1427.7	1550.6	1648.5	2130	2792	2882	2897	3017	3032
E13 I-II	GAR	28	Mousterian	B8	CLC0370	Cervid	1105.5	1180.6	1197	1427.7	1550.7	1648.8	2131.1	2792	2883.5	2899.5	3017	3033
E13IV	GAR	27-28	Mousterian	B8	CLC0371	Unidentified Deer	1105.5	1180.6	1197.6	1427.7	1550.7	1648.8			2883.3
E13IV	GAR	27-28	Mousterian	B8	CLC0372	Ursus (Bear)	1105.5		1233	1453.5	1566	2793	2162.8		2853	2869.1	2958.1		2977
E13IV	GAR	27-28	Mousterian	B8	CLC0373	Capra sp.	1105.5	1180.6	1197.6	1427.7	1580.7	1648.8	2131	2794	2883.2	2899.2			3094
E13IV	GAR	27-28	Mousterian	B8	CLC0374	Unidentified Deer	1105.5	1181	1197.6	1427.7	1550.7	1648.7	2131.1		2883.7	2899.5
E13IV	GAR	27-28	Mousterian	B8	CLC0375	Rupicapra	1105.5	1180.5	1196.7	1427.7	1580.6	1648.7	2130.7	2792.1	2883	2898	3017.9
E14 I-II	GAR	28	Mousterian	B8	CLC0376	Unidentified Deer	1105.5	1180.5	1197	1427.7	1550.7	1648.7	2131	2793	2883.3	2898.4
E14 I-II	GAR	28	Mousterian	B8	CLC0377	Cervid	1105.6	1181	1197	1427.7	1550.7	1648.8	2131	2794	2883.3	2899.3	3019		3034
E14 I-II	GAR	28	Mousterian	B8	CLC0378	Rupicapra	1105.6	1180.6	1196.6	1427.7	1580.6	1648.6	2131	2792	2882	2898	3016
E14 I-II	GAR	28	Mousterian	B8	CLC0379	Unidentified Deer	1105.5	1180.6	1197.5	1427.6	1550.7	1648.7	2131	2794	2883.2	2899.2	3020
E14 I-II	GAR	28	Mousterian	B8	CLC0380	Unidentified Deer	1105.6	1181.6	1197	1427.7	1550.7	1648.8
E14	GAR	29	Mousterian	B8	CLC0381	Cervid	1105.5	1180.7	1197.6	1427.7	1550.7	1648.8	2131	2792	2882	2898	3017		3034
E14	GAR	29	Mousterian	B8	CLC0382	Bos/Bison	1105.5	1192.8	1208.6	1427.6	1580.6	1648.7	2131.1	2793	2853.5	2869.5	3019		3033.3
E14	GAR	29	Mousterian	B8	CLC0383	Unidentified Deer	1105.6	1181.5	1197.6	1427.7	1550.7	1648.8
E14	GAR	29	Mousterian	B8	CLC0384	Bos/Bison	1105.5	1192.6	1208.6	1427.7	1580.7	1648.7	2130.9	2793	2853.2	2869.2	3019		3035
E14	GAR	29	Mousterian	B8	CLC0385	Cervid	1105.5	1181.5	1196.5	1427.7	1550.6	1648.7	2131	2793	2883.7	2899.7	3018		3032.8
E14	GAR	29	Mousterian	B8	CLC0386	Cervid	1105.6	1181	1197	1427.7	1550.7	1648.7	2130.7	2793	2883	2898	3017
E14	GAR	29	Mousterian	B8	CLC0387	Cervid	1105.6	1180.6	1197.6	1427.7	1550.7	1648.7	2130.7	2792.2	2883.2	2898	3018		3034
E14	GAR	29	Mousterian	B8	CLC0388	Cervid	1105.6	1180.6	1197.6	1427.7	1550.7	1648.7	2130.7	2792.2	2883.2	2898	3018		3034
F13 III-IV	GAR	28	Mousterian	B8	CLC0389	Cervid	1105.6	1180.6	1197.6	1427.7	1550.7	1648.7	2130.7	2792.2	2883	2899	3017		3034
F13 III-IV	GAR	28	Mousterian	B8	CLC0390	Cervid	1105.6	1180.6	1197.6	1427.7	1550.7	1648.7	2130.7	2792.2	2883	2899	3017
F13 III-IV	GAR	28	Mousterian	B8	CLC0391	Cervid	1105.6	1180.6	1197.6	1427.7	1550.7	1648.7	2130.7	2792.2	2883	2898	3019		3035
F13 III-IV	GAR	28	Mousterian	B8	CLC0392	Rupicapra	1105.6	1180.7	1197	1427.7	1580.7	1648.7	2130.1	2790	2882	2898	3017
F13 III-IV	GAR	28	Mousterian	B8	CLC0393	Cervid	1105.6	1180.6	1197.6	1427.7	1550.7	1648.7	2130.7	2792.2	2882	2898	3017
F13 III-IV	GAR	28	Mousterian	B8	CLC0394	Cervid	1105.6	1181.6	1197.6	1427.7	1550.7	1648.7	2130.7	2792.2	2883.4	2899.4	3019		3034
F13 III-IV	GAR	28	Mousterian	B8	CLC0395	Cervid	1105.6	1181.6	1197.6	1427.7	1550.7	1648.7	2130.7	2792.2	2883.4	2899.4	3018.5		3034
F13 III-IV	GAR	28	Mousterian	B8	CLC0396	Unidentified Deer	1105.6	1181.6	1197.6	1427.7	1550.7	1648.7	2130.7	2792.2	2883.4	2899.4	3020
F13 III-IV	GAR	28	Mousterian	B8	CLC0397	Cervid	1105.6	1180.6	1196.6	1427.7	1550.7	1648.7	2130.7	2792.2	2883.4	2899.4	3019.5
F13 III-IV	GAR	28	Mousterian	B8	CLC0398	Cervid	1105.6	1180.6	1197.6	1427.7	1550.7	1648.7	2130.7	2792.2	2883.2	2898	3018		3034
F13 III-IV	GAR	28	Mousterian	B8	CLC0399	Cervid	1105.6	1180.6	1197.6	1427.7	1550.7	1648.7	2130.7	2792.2	2883.2	2898	3018		3034
F13 III-IV	GAR	28	Mousterian	B8	CLC0400	Ursus (Bear)	1105.6		1233.7	1453.7	1566.7	2793	2163		2853.5	2869.5	2958		2976
F13 III-IV	GAR	28	Mousterian	B8	CLC0401	Cervid	1105.6	1180.6	1197.6	1427.7	1550.7	1648.7	2130.7	2792.2	2882	2898	3017
F13 III-IV	GAR	28	Mousterian	B8	CLC0402	Felis/Lynx/Ursus	1105.5			1453.7	1566.7		2163		2853.3	2870.3
F13 III-IV	GAR	28	Mousterian	B8	CLC0403	Unidentified Deer	1105.6	1180.7	1197	1427.7	1550.8	1648.8
F13 III-IV	GAR	28	Mousterian	B8	CLC0404	Cervid	1105.6	1180.6	1197.6	1427.7	1550.7	1648.7	2130.7	2792.2	2882	2898	3017
F13 I-II	GAR	29	Mousterian	B8	CLC0405	Cervid	1105.6	1180.6	1197.6	1427.7	1550.7	1648.7	2130.7	2792.2	2883.4	2899.4	3019
F13 I-II	GAR	29	Mousterian	B8	CLC0406	Cervid	1105.6	1181.6	1197.6	1427.7	1550.7	1648.7	2130.7	2792.2	2883.4	2899.4	3018.5	3034
F13 I-II	GAR	29	Mousterian	B8	CLC0407	Cervid	1105.6	1180.6	1196.6	1427.7	1550.7	1648.7	2130.7	2792.2	2883.4	2899.4	3018.5	3034
F13 I-II	GAR	29	Mousterian	B8	CLC0408	Cervid	1105.6	1180.6	1196.6	1427.7	1550.7	1648.7	2130.7	2792.2	2883.4	2899.4	3019.5	3035
F13 I-II	GAR	29	Mousterian	B8	CLC0409	Fail
F13 I-II	GAR	29	Mousterian	B8	CLC0410	Cervid	1105.5	1181	1197	1427.7	1550.6	1648.7	2130.8	2792.6	2882.7	2898.9	3018.5	3033.7
F13 I-II	GAR	29	Mousterian	B8	CLC0411	Bos/Bison	1105.5	1192.6	1208	1427.7	1580.6	1648.7	2131.5	2792	2853.7	2869.4	3017.6	3033.7
F13 I-II	GAR	29	Mousterian	B8	CLC0412	Cervid	1105.5	1181.6	1196.6	1427.7	1550.7	1648.7	2130.8	2793	2882.8	2898	3019
F13 I-II	GAR	29	Mousterian	B8	CLC0413	Cervid	1105.5	1181.6	1196.6	1427.7	1550.7	1648.7	2131.5	2792	2882.7	2898.9	3019	3034
F13 I-II	GAR	29	Mousterian	B8	CLC0414	Fail
F13 I-II	GAR	29	Mousterian	B8	CLC0415	Cervid	1105.5	1181	1197	1427.7	1550.7	1648.7	2131	2792	2883	2899	3019	3033.8
F14 II	GAR	23 Lower	Mousterian	B8	CLC0416	Cervid	1105.5	1180.6	1197.6	1427.7	1550.7	1648.7	2130.8	2792.8	2883	2899	3019
F14 II	GAR	23 Lower	Mousterian	B8	CLC0417	Cervid	1105.5	1181.6	1197.6	1427.7	1550.7	1648.7	2131.1	2792.8	2883	2899	3019
F14 II	GAR	23 Lower	Mousterian	B8	CLC0418	Fail	1105.5								2883.5	2899.5
F14 II	GAR	23 Lower	Mousterian	B8	CLC0419	Cervid	1105.5	1180.6	1197.6	1427.7	1550.7	1648.7	2131.1	2792.5	2883.6	2899	3018.7	3034.8
F14 II	GAR	23 Lower	Mousterian	B8	CLC0420	Cervid	1105.5	1180.6	1197.6	1427.7	1550.7	1648.7	2131.1	2793	2883.6	2899.6	3019	3034.7
F14 II	GAR	24 Upper	Mousterian	B8	CLC0421	Bos/Bison	1105.5		1208	1427.7	1580.6	1648.7	2131.5	2792	2853.7	2869.4	3017.6	3033.7
F14 II	GAR	24 Upper	Mousterian	B8	CLC0422	Cervid	1105.5	1180.8	1196.7	1427.7	1550.7	1648.7	2131.5	2792	2882.7	2898.9	3018	3034
F14 II	GAR	24 Upper	Mousterian	B8	CLC0423	Cervid	1105.5	1181.6	1196.6	1427.7	1550.7	1648.7	2131.5	2792	2882.7	2898.9	3018
F14 II	GAR	24 Upper	Mousterian	B8	CLC0424	Cervid	1105.5	1181.6	1196.6	1427.7	1550.7	1648.7	2130.8	2793	2882.8	2898	3020
F14 II	GAR	24 Upper	Mousterian	B8	CLC0425	Cervid	1105.5	1180.5	1196.6	1427.7	1550.7	1648.7	2130	2794	2882.7	2898.9	3019
F14 II	GAR	24 Lower	Mousterian	B8	CLC0426	Cervid	1105.5	1181	1197	1427.7	1550.7	1648.7	2130.7	2792	2882.7	2898.9	3020
F14 II	GAR	24 Lower	Mousterian	B8	CLC0427	Cervid	1105.5	1180.6	1197.6	1427.7	1550.7	1648.7	2130.8	2792.8	2883	2899	3019
F14 II	GAR	24 Lower	Mousterian	B8	CLC0428	Cervid	1105.5	1180.6	1197.6	1427.7	1550.7	1648.7	2130.8	2792.8	2883	2899	3019
F14 II	GAR	25 Upper	Mousterian	B8	CLC0429	Cervid	1105.5	1181.6	1196.6	1427.7	1550.7	1648.7	2131.1	2792.8	2883	2899	3019	3034
F14 II	GAR	25 Upper	Mousterian	B8	CLC0430	Bos/Bison	1105.5	1193.6	1209.6	1427.7	1580.7	1648.8	2131	2794	2853.5	2869.5	3019	3034.7
F14 II	GAR	25 Upper	Mousterian	B8	CLC0431	Cervid	1105.5	1181.6	1196.6	1427.7	1550.7	1648.7	2131.1	2792.8	2883	2899	3019	3034
F14 II	GAR	25 Lower	Mousterian	B8	CLC0432	Cervid	1105.5	1181.6	1196.6	1427.7	1550.7	1648.7	2131.1	2793	2883	2899	3018.4
F14 II	GAR	25 Lower	Mousterian	B8	CLC0433	Cervid	1105.5	1180		1427.7	1550.7	1648.7	2131.1	2793	2883	2899	3018.4
F14 II	GAR	25 Lower	Mousterian	B8	CLC0434	Cervid	1105.5	1181.6	1196.6	1427.7	1550.7	1648.7	2131.1	2793	2883	2899	3018.4
F14 II	GAR	25 Lower	Mousterian	B8	CLC0435	Cervid	1105.5	1181.6	1196.6	1427.7	1550.7	1648.7	2131.1	2793	2883	2899	3019	3035
F14 II	GAR	25 Lower	Mousterian	B8	CLC0436	Cervid	1105.5	1181.6	1196.6	1427.7	1550.7	1648.7	2131.1	2793	2883	2899	3018.4
F14 III-IV	GAR	27	Mousterian	B8	CLC0437	Cervid	1105.5	1180.6	1196.6	1427.7	1550.7	1648.8	2134		2883.6	2899.6	3019
F14 III-IV	GAR	27	Mousterian	B8	CLC0438	Cervid	1105.5	1180.6	1197.6	1427.7	1550.7	1648.8	2131.1	2793.4	2883.6	2899.6	3019
F14 III-IV	GAR	27	Mousterian	B8	CLC0439	Cervid	1105.5	1181.6	1197.7	1427.7	1550.7	1648.7	2131.1	2792.8	2883	2899	3018
F14 III-IV	GAR	28	Mousterian	B8	CLC0440	Cervid	1105.5	1181.6	1197.7	1427.7	1550.7	1648.7	2131.1	2792.8	2883	2899	3018
F14 III-IV	GAR	28	Mousterian	B8	CLC0441	Cervid	1105.5	1181.6	1197.7	1427.7	1550.7	1648.7	2131.1		2883	2899	3019
F14 III-IV	GAR	28	Mousterian	B8	CLC0442	Fail
G12 I	GAR	31	Mousterian	B9	CLC0443	Cervid	1105.6	1180.6	1197.6	1427.7	1550.5	1648.6	2130.4	2792.6	2883	2898	3018.2	3032.4
G12 I	GAR	31	Mousterian	B9	CLC0444	Fail
G12 I	GAR	31	Mousterian	B9	CLC0445	Sus sp.	1105.6	1180.5	1197.6	1453.6	1550.5	1648.5	2131.4	2820	2883	2898		3033
G12 I	GAR	31	Mousterian	B9	CLC0446	Capra sp.	1105.5	1181	1197	1427.7	1580.6	1648.6	2131	2791	2883	2898		3092.2
G12 I	GAR	31	Mousterian	B9	CLC0447	Capra sp.	1105.5	1181.6	1196.6	1427.7	1580.6	1648.6	2131	2790.9	2882	2897		3093
G12 I	GAR	31	Mousterian	B9	CLC0448	Cervid	1105.6	1180.5	1196.6	1427.7	1550.5	1648.6	2130.4	2792.6	2883	2898	3018.2	3032.4
G12 I	GAR	31	Mousterian	B9	CLC0449	Sus sp.	1105.6	1180.5	1196.6	1453.6	1550	1648.5	2131		2883	2899
G12 I	GAR	31	Mousterian	B9	CLC0450	Cervid	1105.6	1181.6	1197.6	1427.7	1550.5	1648.6	2130.4	2792.6	2883	2898	3017.2	3032.4
G12 I	GAR	31	Mousterian	B9	CLC0451	Cervid	1105.6	1180.6	1197.6	1427.7	1550.5	1648.6	2130.4	2792.6	2883	2898	3017.2	3032.4
G12 I	GAR	31	Mousterian	B9	CLC0452	Cervid	1105.6	1181.6	1196.6	1427.7	1550.5	1648.6	2130.4	2792.6	2883	2898	3017.2	3032.4
G12 I	GAR	31	Mousterian	B9	CLC0453	Cervid	1105.6	1180.6	1196.6	1427.7	1550.5	1648.6	2130.4	2792.6	2883	2898	3017.2	3032.4
G12 I	GAR	31	Mousterian	B9	CLC0454	Cervid	1105.6	1181.6	1196.6	1427.7	1550.5	1648.6	2130.4	2792.6	2883	2898		3034
G12 I	GAR	31	Mousterian	B9	CLC0455	Cervid	1105.6	1180.6	1197.6	1427.7	1550.5	1648.6	2130.4	2792.6	2883	2898	3018.2	3032.4
G12 I	GAR	31	Mousterian	B9	CLC0456	Cervid	1105.6	1181.6	1197.6	1427.7	1550.5	1648.6	2130.4	2792.6	2883	2898	3018.2	3032.4
G12 I	GAR	31	Mousterian	B9	CLC0457	Cervid	1105.6	1180.5	1196.6	1427.7	1550.5	1648.6	2130.4	2792.6	2883	2898	3018.2	3032.4
G12 I	GAR	31	Mousterian	B9	CLC0458	Felis/Lynx/Ursus	1105.5			1453.7	1566.6		2162.8		2853	2868
G12 I	GAR	31	Mousterian	B9	CLC0459	Cervid	1105.6	1180.5	1196.6	1427.7	1550.5	1648.6	2130.4	2792.6	2883	2898	3018.2	3032.4
G12 I	GAR	31	Mousterian	B9	CLC0460	Rupicapra	1105.6	1180.6	1197.6	1427.6	1580.5	1648.6	2130.4	2792.5	2883	2898	3017.3	3033
G12 IV	GAR	25 lower 24 upper lower	Mousterian	B9	CLC0461	Cervid	1105.6		1197.6	1427.7	1550.5	1648.6	2130.4	2792.6	2883	2898	3017.2	3032.4
G12 IV	GAR	25 lower 24 upper lower	Mousterian	B9	CLC0462	Cervid	1105.6	1180.6	1197.6	1427.7	1550.5	1648.6	2130.4	2792.6	2883	2898	3017.2	3032.4
G12 IV	GAR	25 lower 24 upper lower	Mousterian	B9	CLC0463	Cervid	1105.6	1180.6	1196.6	1427.7	1550.5	1648.6	2130.4	2792.6	2883	2898	3017.2	3032.4
G12 IV	GAR	25 lower 24 upper lower	Mousterian	B9	CLC0464	Equus sp.	1105.5		1199.5	1427.7	1550.7	1650.7	2145	2821	2883.4	2899.5	2984	2999.6
G13 I	GAR	23 upper lower 24 upper	Mousterian	B9	CLC0465	Cervid	1105.6	1180.6	1196.6	1427.7	1550.5	1648.6	2130.4	2792.6	2883	2898	3017.2	3032.4
G13 I	GAR	23 upper lower 24 upper	Mousterian	B9	CLC0466	Cervid	1105.6	1181.6	1196.6	1427.7	1550.5	1648.6	2130.4	2792.6	2883	2898	3017
G13 I	GAR	23 upper lower 24 upper	Mousterian	B9	CLC0467	Cervid	1105.6	1181.6	1196.6	1427.7	1550.5	1648.6	2130.4	2792.6	2883	2898	3017	3032.4
G13 I-II	GAR	25	Mousterian	B9	CLC0468	Cervid	1105.6	1181.6	1196.6	1427.7	1550.5	1648.6	2130.4	2792.6	2883	2898	3017	3032.4
G13 I-II	GAR	25	Mousterian	B9	CLC0469	Bos/Bison	1105.5	1192.7	1208.7	1427.7	1580.7	1648.8	2130.1		2853	2868	3017	3033
G13 I-II	GAR	25	Mousterian	B9	CLC0470	Cervid	1105.6	1180.6	1196.7	1427.7	1550.5	1648.6	2130.4	2792.6	2883	2898	3017	3032.4
G13 I-II	GAR	25	Mousterian	B9	CLC0471	Bos/Bison	1105.5	1192.7	1208.7	1427.7	1580.7	1648.8	2130.1		2853	2868	3017	3033
G13 I-II	GAR	25	Mousterian	B9	CLC0472	Capra sp.	1105.6	1180.6	1196.6	1427.7	1580.6	1648.6	2130.4	2792.6	2883	2898		3092.3
G13 I-II	GAR	24 upper lower	Mousterian	B9	CLC0473	Capra sp.	1105.6	1180.6	1196.6	1427.7	1580.6	1648.6	2130.4	2792.6	2883	2898	3076.4	3092.3
G13 I-II	GAR	24 upper lower	Mousterian	B9	CLC0474	Capra sp.	1105.6	1180.6	1196.6	1427.7	1580.6	1648.6	2130.4	2792.6	2883	2898		3092.3
G13 I-II	GAR	24 upper lower	Mousterian	B9	CLC0475	Capra sp.	1105.6		1196.6	1427.7	1580.6	1648.6	2130.4	2792.6	2883	2898		3093.8
G13 I-II	GAR	24 upper lower	Mousterian	B9	CLC0476	Rhino	1105.6	1182.7	1198.7	1453.8	1550.8				2870
G13 I-II	GAR	26	Mousterian	B9	CLC0477	Unidentified Caprines	1105.6	1180.6	1196.6	1427.7	1580.6	1648.6	2130.4	2792.6	2883	2898
G13 I-II	GAR	26	Mousterian	B9	CLC0478	Cervid	1105.6	1181.6	1196.6	1427.7	1550.5	1648.6	2130.4	2792.6	2883	2898	3017	3032.4
G13 I-II	GAR	26	Mousterian	B9	CLC0479	Cervid	1105.6	1181.6	1196.6	1427.7	1550.5	1648.6	2130.4	2792.6	2883	2898	3017
G13 I-II	GAR	26	Mousterian	B9	CLC0480	Fail
G13 I-II	GAR	26	Mousterian	B9	CLC0481	Capra sp.	1105.5	1180.6	1196.7	1427.7	1580.7	1648.6	2130.1	2792	2881	2896		3093.2
G13 I-II	GAR	26	Mousterian	B9	CLC0482	Cervid	1105.6	1181.6	1196.6	1427.7	1550.5	1648.6	2130.4	2792.6	2883	2898	3017	3032.4
G13 I-II	GAR	26	Mousterian	B9	CLC0483	Cervid	1105.6	1181.6	1196.6	1427.7	1550.5	1648.6	2130.4	2792.6	2883	2898	3017	3032.4
G13 I-II	GAR	26	Mousterian	B9	CLC0484	Capra sp.	1105.6	1180.6	1196.6	1427.7	1580.6	1648.6	2130.4	2792.6	2883	2898		3092.3
G13 I-II	GAR	26	Mousterian	B9	CLC0485	Capra sp.	1105.6	1180.6	1196.6	1427.7	1580.6	1648.6	2130.4	2792.6	2883	2898		3092.3
G13 I-II	GAR	26	Mousterian	B9	CLC0486	Cervid	1105.6	1180.6	1196.6	1427.7	1550.9	1648.6	2130.4	2792.6	2883	2898	3017.5	3033.6
G13 I-II	GAR	26	Mousterian	B9	CLC0487	Equus sp.	1105.5	1182	1199	1427.7	1550.8	1650			2883.6
G13 I-II	GAR	26	Mousterian	B9	CLC0488	Capra sp.	1105.6	1181.6	1196.6	1427.7	1580.6	1648.6	2130.4	2792.6	2883	2898		3093.8
G13 I-II	GAR	26	Mousterian	B9	CLC0489	Capra sp.	1105.5	1180.5	1197.6	1427.7	1580.8	1648.8	2130.7	2792.7	2883	2898	3078	3093
G13 I-II	GAR	26	Mousterian	B9	CLC0490	Cervid	1105.5	1180.5	1197.6	1427.7	1550.8	1648.8	2130.7	2792.7	2883	2898	3017.2	3033
G13 I-II	GAR	26	Mousterian	B9	CLC0491	Capra sp.	1105.5	1180.5	1197.6	1427.7	1580.8	1648.8	2130.7	2792.7	2883	2898		3092.2
G13 I-II	GAR	26	Mousterian	B9	CLC0492	Cervid	1105.5	1181.6	1196.6	1427.7	1550.8	1648.8	2130.7	2792.7	2883	2898	3017.2
G13 I-II	GAR	26	Mousterian	B9	CLC0493	Cervid	1105.5	1180.5	1197.6	1427.7	1550.8	1648.8	2130.7	2792.7	2883	2898	3017.2	3033
G13 I-II	GAR	26	Mousterian	B9	CLC0494	Bos/Bison	1105.5	1192.6	1208.6	1427.7	1580.8	1648.8	2130.7	2791.7	2853	2869	3017.2	3032.3
G13 I-II	GAR	26	Mousterian	B9	CLC0495	Cervid	1105.5	1180.5	1197.6	1427.7	1550.8	1648.8	2130.7	2792.7	2883	2898	3019.5	3034.6
G13 I-II	GAR	26	Mousterian	B9	CLC0496	Capra sp.	1105.5	1180.5	1197.6	1427.7	1580.7	1648.8	2130.7	2792.7	2883	2898		3094
G14 II	GAR	25	Mousterian	B9	CLC0497	Capra sp.	1105.5	1180.5	1197.6	1427.7	1580.7	1648.8	2130.7	2792.3	2883	2898		3093.7
G14 II	GAR	25	Mousterian	B9	CLC0498	Cervid	1105.5	1180.5	1197.6	1427.7	1550.8	1648.8	2130.7	2792.7	2883	2898	3018	3033.6
G14 II	GAR	25	Mousterian	B9	CLC0499	Cervid	1105.5	1180.5	1197.6	1427.7	1550.8	1648.8	2130.7	2792.7	2883	2898	3018	3033.8
G14 II	GAR	25	Mousterian	B9	CLC0500	Rupicapra	1105.5	1180.5	1197.6	1427.7	1580.7	1648.8	2130.7	2792.7	2883	2898	3018.5	3033.5
G14 II	GAR	25	Mousterian	B9	CLC0501	Capra sp.	1105.5	1180.5	1197.6	1427.7	1580.8	1648.8	2130.7	2792.7	2883	2898	3078	3093
G14 II	GAR	25	Mousterian	B9	CLC0502	Bos/Bison	1105.5	1192.6	1208.6	1427.7	1580.8	1648.8	2130.7	2791.7	2853	2869	3017.2	3032.3
G14 II	GAR	25	Mousterian	B9	CLC0503	Rhino	1105.5	1183.6	1199.6	1453.8	1550.8		2144.8	2791.8	2869	2885.5
G14 II	GAR	25	Mousterian	B9	CLC0504	Cervid	1105.5	1180.5	1197.6	1427.7	1550.8	1648.8	2130.7	2792.7	2883	2898	3017.2	3033
G14 II	GAR	25	Mousterian	B9	CLC0505	Fail
G14 II	GAR	25	Mousterian	B9	CLC0506	Capra sp.	1105.5	1180.5	1197.6	1427.7	1580.7	1648.8	2131.1	2793	2883	2898	3078.6	3093.7
G14 II	GAR	25	Mousterian	B9	CLC0507	Capra sp.	1105.5	1180.5	1197.6	1427.7	1580.7	1648.8	2130.7	2792.3	2883	2898	3079	3093.7
G13 III	GAR	31	Mousterian	B9	CLC0508	Cervid	1105.5	1181.5	1197.5	1427.7	1550.6	1648.8	2131	2793	2883.5	2899.5	3019	3034.5
G13 III	GAR	31	Mousterian	B9	CLC0509	Bos/Bison	1105.6	1193.6	1208.6	1427.7	1580.8	1648.8	2131.1		2853.5	2869.5
G13 III	GAR	31	Mousterian	B9	CLC0510	Cervid	1105.5	1180.5	1197.6	1427.7	1550.8	1648.8	2130.7	2792.7	2883	2898	3019	3034.6
G13 III	GAR	31	Mousterian	B9	CLC0511	Fail
G13 III	GAR	31	Mousterian	B9	CLC0512	Cervid	1105.5	1180.6	1197.6	1427.7	1550.8	1648.8	2130.8	2792.8	2883	2898	3017.4	3032.5
G13 IV	GAR	29	Mousterian	B9	CLC0513	Cervid	1105.5	1180.6	1197.6	1427.7	1550.8	1648.8	2130.8	2792.8	2883	2898	3018
G13 IV	GAR	29	Mousterian	B9	CLC0514	Unidentified Deer	1105.5	1181.7	1197.7	1427.7	1550.8	1648.9
G13 IV	GAR	29	Mousterian	B9	CLC0515	Cervid	1105.5	1180.6	1197.6	1427.7	1550.8	1648.8	2130.8	2792.8	2883	2898	3017.4	3032.5
G13 IV	GAR	29	Mousterian	B9	CLC0516	Cervid	1105.5	1180.6	1197.6	1427.7	1550.8	1648.8	2130.8	2792.8	2883	2898	3017.4	3032.5
G13 IV	GAR	29	Mousterian	B9	CLC0517	Unidentified Deer	1105.5	1181	1197.7	1427.7	1550.8	1648.9
G13 IV	GAR	29	Mousterian	B9	CLC0518	Cervid	1105.5	1181.1	1197.6	1427.7	1550.8	1648.8	2131.1	2794	2883	2898	3018	3034
G13 IV	GAR	29	Mousterian	B9	CLC0519	Fail
G13 IV	GAR	29	Mousterian	B9	CLC0520	Cervid	1105.5	1181.1	1197.6	1427.7	1550.8	1648.8	2131.1	2794	2883	2898	3019	3035
G13 IV	GAR	29	Mousterian	B9	CLC0521	Fail
G13 IV	GAR	29	Mousterian	B9	CLC0522	Fail
G13 IV	GAR	29	Mousterian	B9	CLC0523	Cervid	1105.5	1181.1	1197.6	1427.7	1550.8	1648.8	2131.1	2794	2883	2898	3019	3034.8
G13 IV	GAR	29	Mousterian	B9	CLC0524	Cervid	1105.5	1180.6	1197.6	1427.7	1550.8	1648.8	2130.8	2792.8	2883	2898	3017.4	3032.5
G13 IV	GAR	29	Mousterian	B9	CLC0525	Cervid	1105.5	1180.6	1197.6	1427.7	1550.8	1648.8	2130.8	2792.8	2883	2898	3017.4	3032.5
G13 IV	GAR	29	Mousterian	B9	CLC0526	Fail
G13 IV	GAR	29	Mousterian	B9	CLC0527	Cervid	1105.5	1180.6	1197.6	1427.7	1550.8	1648.8	2130.8	2792.8	2883	2898	3017.4	3032.5
G13 IV	GAR	29	Mousterian	B9	CLC0528	Cervid	1105.5	1181.1	1197.6	1427.7	1550.8	1648.8	2131.1	2794	2883	2898	3019	3035
G13 IV	GAR	29	Mousterian	B9	CLC0529	Bos/Bison	1105.5	1192.6	1208.7	1427.7	1580.7	1648.8	2131.2	2792.3	2853.6	2869.6	3019	3034
G13 IV	GAR	30	Mousterian	B9	CLC0530	Cervid	1105.5	1181.1	1197.6	1427.7	1550.8	1648.8	2131.1	2794	2883	2898	3019	3034.8
G13 IV	GAR	30	Mousterian	B9	CLC0531	Fail
G13 IV	GAR	30	Mousterian	B9	CLC0532	Cervid	1105.5	1181.1	1197.6	1427.7	1550.8	1648.8	2131.1	2794	2883	2898	3019	3034.8
G13 IV	GAR	30	Mousterian	B9	CLC0533	Cervid	1105.5	1181.1	1197.6	1427.7	1550.8	1648.8	2131.1	2794	2883	2898	3019	3034.8
G13 IV	GAR	30	Mousterian	B9	CLC0534	Ursus (Bear)	1105.5		1233.6	1453.7	1566.7		2163		2853.4	2869.4	2957.5
G13 IV	GAR	30	Mousterian	B10	CLC0535	Cervid	1105.6	1180.5	1196.6	1427.7	1550.4	1648.4	2130.4	2792.2	2883	2898.3	3018.2	3034.3
G13 IV	GAR	30	Mousterian	B10	CLC0536	Canid	1105.6	1211.1	1226.6	1453.5	1566.4		2130.4		2853.5	2869.4
G13 IV	GAR	30	Mousterian	B10	CLC0537	Cervid	1105.5	1181.6	1197.6	1427.5	1550.4	1648.4	2130.4	2792	2882.4	2898.3	3018.2	3033.3
G13 IV	GAR	30	Mousterian	B10	CLC0538	Cervid	1105.5	1180.6	1197.6	1427.5	1550.4	1648.4	2130.4	2792	2882.4	2898.3	3017.1	3032.2
G13 IV	GAR	30	Mousterian	B10	CLC0539	Cervid	1105.5	1180.6	1197.6	1427.5	1550.4	1648.4	2130.4	2792	2882.4	2898.3	3017.1	3032.2
H12 I	RSA''	11 upper	Uluzzian	B8	CLC0540	Equus sp.	1105.5	1181	1198	1427.7	1550.7		2148		2883.7
H12 I	RSA''	11 upper	Uluzzian	B8	CLC0541	Bos/Bison	1105.5	1192.7	1208.7	1427.7	1580.9	1648.7	2130.8	2793	2852.7		3019
H12 I	RSA''	11 upper	Uluzzian	B8	CLC0542	Bos/Bison	1105.5	1193	1208.7	1427.7	1580.8	1648.7	2131.1	2793	2853.5	2869.5	3018.4	3034.7
H12 I	RSA''	11 upper	Uluzzian	B8	CLC0543	Cervid	1105.5	1181.6	1196.6	1427.7	1550.7	1648.7	2131.1	2793	2883	2899	3018.4	3034.7
H12 I	RSA''	11 upper	Uluzzian	B8	CLC0544	Bos/Bison	1105.5	1192.7	1208.7	1427.7	1580.8	1648.7	2131.1	2793	2853.5	2869.5	3018.4	3034.7
H12 I	RSA''	11 upper	Uluzzian	B8	CLC0545	Equus sp.	1105.5	1182	1198	1427.7	1550.7	1650.7	2145.1	2821	2883.5	2899.5		3000
H12 I	RSA''	11 upper	Uluzzian	B8	CLC0546	Equus sp.	1105.5	1182	1198	1427.7	1550.7	1650.7	2145.1	2821	2883.5	2899.5	2983.6	3000
H12 I	RSA''	11 upper	Uluzzian	B8	CLC0547	Unidentified Deer	1105.5	1181.6	1196.6	1427.7	1550.7	1648.7	2131.1	2793	2883	2899	3019
H12 I	RSA''	11 upper	Uluzzian	B8	CLC0548	Equus sp.	1105.5	1182	1198	1427.7	1550.7	1650.7	2145.1	2821	2883.5	2899.5
H12 I	RSA''	11 upper	Uluzzian	B8	CLC0549	Equus sp.	1105.5	1182	1198	1427.7	1550.7	1650.7	2145.1	2821	2883.5	2899.5
H12 I	RSA''	11 upper	Uluzzian	B8	CLC0550	Equus sp.	1105.5	1182	1198	1427.7	1550.7	1650.7	2145.1	2821	2883.5	2899.5
H12 I	RSA''	11 upper	Uluzzian	B8	CLC0551	Equus sp.	1105.5	1182.6	1198.6	1427.7	1550.7	1650.7			2883.6
H12 I	RSA''	11 upper	Uluzzian	B10	CLC0552	Equus sp.	1105.6	1182.6	1199.6	1427.7	1550.6	1650.6	2144.5	2819.6	2883	2898		2999
H12 I	RSA''	11 upper	Uluzzian	B10	CLC0553	Equus sp.	1105.6	1182.5	1199.6	1427.7	1550.7	1650.7	2144.7	2820.7	2883	2898.4		2999
H12 I	RSA''	11 upper	Uluzzian	B10	CLC0554	Equus sp.	1105.6	1182.6	1199.6	1427.7	1550.6	1650.6	2144.5	2819.6	2883	2898		2999
H12 I	RSA''	11 upper	Uluzzian	B10	CLC0555	Equus sp.	1105.5	1182.5	1198.5	1427.7	1550.7		2145	2821.1	2883.4	2899.4
H13 I	RSA''	11 upper	Uluzzian	B10	CLC0556	Equus sp.	1105.6	1182.6	1199.6	1427.7	1550.6	1650.6	2144.5	2819.6	2883	2898		2999
H13 I	RSA''	11 upper	Uluzzian	B10	CLC0557	Equus sp.	1105.6	1182.6	1199.6	1427.7	1550.6	1650.6	2144.5	2819.6	2883	2898		2999
H13 I	RSA''	11 upper	Uluzzian	B10	CLC0558	Equus sp.	1105.6	1182.6	1199.6	1427.7	1550.6	1650.6	2144.5	2819.6	2883	2898		2999
H13 I	RSA''	11 upper	Uluzzian	B10	CLC0559	Fail
H13 I	RSA''	11 upper	Uluzzian	B10	CLC0560	Fail
H13 I	RSA''	11 upper	Uluzzian	B10	CLC0561	Cervid	1105.5	1180.6	1197.6	1427.5	1550.4	1648.4	2134.2	2792	2882.4	2898.3	3018.2
H13 I	RSA''	11 upper	Uluzzian	B10	CLC0562	Equus sp.	1105.6	1182.6	1198.6	1427.6	1550.6	1650.5	2144.4	2819.5	2883	2898		2999
H13 I	RSA''	11 upper	Uluzzian	B10	CLC0563	Equus sp.	1105.6	1182.6	1198.6	1427.6	1550.6	1650.5	2144.4	2819.5	2883	2898		2999
H13 I	RSA''	11 upper	Uluzzian	B10	CLC0564	Equus sp.	1105.6	1182.6	1199.6	1427.7	1550.6	1650.6	2144.5	2819.6	2883	2898		2999
H13 I	RSA''	12 upper	Uluzzian	B10	CLC0565	Fail
H13 I	RSA''	12 upper	Uluzzian	B10	CLC0566	Fail
H13 I	RSA''	12 upper	Uluzzian	B10	CLC0567	Fail
H13 I	RSA''	12 upper	Uluzzian	B10	CLC0568	Fail
H13 I	RSA''	12 upper	Uluzzian	B10	CLC0569	Equus sp.	1105.5	1182.5	1198.5	1427.7	1550.6				2883.3
H13 I	RSA''	12 upper	Uluzzian	B10	CLC0570	Fail
H13 II	RSA''	11 lower	Uluzzian	B10	CLC0571	Bos/Bison	1105.7	1192.7	1208.7	1427.5	1580.4	1648.5	2130.4	2793	2853	2868.4	3017.3	3033.4
H13 II	RSA''	11 lower	Uluzzian	B10	CLC0572	Fail
H13 II	RSA''	11 lower	Uluzzian	B10	CLC0573	Equus sp.	1105.7	1182.6	1199.7	1427.6	1550.5	1650.5	2144.5	2821	2882	2898		2999.5
H13 II	RSA''	11 lower	Uluzzian	B10	CLC0574	Bos/Bison	1105.7	1192.7	1208.7	1427.5	1580.4	1648.5	2130.4	2793	2853	2868.4	3017.3	3033.4
H13 II	RSA''	11 lower	Uluzzian	B10	CLC0575	Bos/Bison	1105.7	1192.7	1208.7	1427.5	1580.4	1648.5	2130.4	2793	2853	2868.4	3017.3	3033.4
H13 II	RSA''	11 lower	Uluzzian	B10	CLC0576	Fail
H13 II	RSA''	11 upper	Uluzzian	B10	CLC0577	Equus sp.	1105.7	1182.6	1199.7	1427.6	1550.5	1650.5	2144.5	2821	2882	2898		2999.5
H13 II	RSA''	11 upper	Uluzzian	B10	CLC0578	Bos/Bison	1105.6	1193.5	1208.7	1427.7	1580.8	1648.8	2131.1	2793.4	2853.5	2869.6	3018.5	3033.7
H13 II	RSA''	11 upper	Uluzzian	B10	CLC0579	Cervid	1105.5	1181.6	1197.6	1427.7	1550.7	1648.8	2131.1	2792.5	2886.6	2899.6	3018.7	3033.7
H13 II	RSA''	11 upper	Uluzzian	B10	CLC0580	Cervid	1105.5	1180.6	1196.7	1427.7	1550.8	1648.9	2131.1	2793.6	2883.8	2899.7	3019
H13 II	RSA''	11 upper	Uluzzian	B10	CLC0581	Equus sp.	1105.6	1182.6	1198.6	1427.7	1550.8		2145.1	2821	2883.6	2899.6		3000
H13 II	RSA''	11 upper	Uluzzian	B10	CLC0582	Equus sp.	1105.7	1182.6	1199.7	1427.6	1550.5	1650.5	2144.5	2821	2882	2898	2983.4	2999.5
H13 II	RSA''	11 upper	Uluzzian	B10	CLC0583	Equus sp.	1105.7	1182.6	1199.7	1427.6	1550.5	1650.5	2144.5	2821	2882	2898		2999.5
H13 II	RSA''	11 upper	Uluzzian	B10	CLC0584	Equus sp.	1105.7	1182.6	1199.7	1427.6	1550.5	1650.5	2144.5	2821	2882	2898		2999.5
H13 II	RSA''	11 upper	Uluzzian	B10	CLC0585	Cervid	1105.7	1181.6	1197.6	1427.6	1550.5	1648.8	2130.8	2792.8	2882	2898	3018
H13 II	RSA''	11 upper	Uluzzian	B10	CLC0586	Fail
H13 II	RSA''	11 upper	Uluzzian	B10	CLC0587	Bos/Bison	1105.7	1192.7	1208.7	1427.5	1580.4	1648.5	2130.4	2793	2853	2868.4	3017.3	3033.4
H13 II	RSA''	11 upper	Uluzzian	B10	CLC0588	Bos/Bison	1105.7	1192.7	1208.7	1427.5	1580.4	1648.5	2130.4	2793	2853	2868.4	3017.3	3033.4
H13 II	RSA''	12 upper	Uluzzian	B10	CLC0589	Equus sp.	1105.7	1182.6	1199.7	1427.6	1550.5	1650.5	2144.5	2821	2882	2898	2983.4	2999.5
H13 II	RSA''	12 upper	Uluzzian	B10	CLC0590	Equus sp.	1105.7	1182.6	1199.7	1427.6	1550.5		2145.2	2821	2882	2898		2999.5
H13 II	RSA''	12 upper	Uluzzian	B10	CLC0591	Bos/Bison	1105.6	1193.5	1208.7	1427.7	1580.8	1648.8	2131.1	2793.4	2853.5	2869.6	3018.5	3033.7
H13 III	RSA''	12 upper	Uluzzian	B10	CLC0592	Equus sp.	1105.7	1182.6	1199.7	1427.6	1550.5	1650.5	2144.5	2821	2882	2898		2999.5
H13 III	RSA''	12 upper	Uluzzian	B10	CLC0593	Equus sp.	1105.5	1182.6	1198.6	1427.7	1550.7		2145.1	2822	2883.5	2899.5		2999.6
H13 III	RSA''	12 upper	Uluzzian	B10	CLC0594	Equus sp.	1105.5	1182.6	1198.6	1427.7	1550.7	1650	2145.1	2822	2883.5	2899.5		2999.6
H13 III	RSA''	12 upper	Uluzzian	B10	CLC0595	Capra sp.	1105.5		1196.6	1427.7	1580.7	1648.8	2131.1	2793	2883.4	2899.4		3093.6
H13 III	RSA''	12 upper	Uluzzian	B10	CLC0596	Fail
H13 III	RSA''	12 upper	Uluzzian	B10	CLC0597	Fail
H13 III	RSA''	11 upper	Uluzzian	B10	CLC0598	Equus sp.	1105.5	1182.6	1198.6	1427.7	1550.7	1650.7	2145.1	2822	2883.5	2899.5		2999.6
H13 III	RSA''	11 upper	Uluzzian	B10	CLC0599	Cervid	1105.5	1181.6	1196.5	1427.7	1550.7	1648.8	2131.1	2793.5	2883.6	2899.6	3018.6	3033.7
H13 III	RSA''	11 upper	Uluzzian	B10	CLC0600	Equus sp.	1105.5	1182.6	1198.6	1427.7	1550.7	1649.8	2145.1	2822	2883.5	2899.5		2999.6
H13 III	RSA''	11 upper	Uluzzian	B10	CLC0601	Fail
H13 III	RSA''	11 upper	Uluzzian	B10	CLC0602	Equus sp.	1105.5	1182.6	1198.6	1427.7	1550.7	1650.6	2145.1	2822	2883.5	2899.5		2999.6
H13 III	RSA''	11 upper	Uluzzian	B10	CLC0603	Equus sp.	1105.5	1182.6	1198.6	1427.7	1550.7	1650.6	2145.1	2822	2883.5	2899.5	2984.6	2999.6
H13 III	RSA''	11 upper	Uluzzian	B10	CLC0604	Equus sp.	1105.5	1182.6	1198.6	1427.7	1550.7	1650.6	2145.1	2822	2883.5	2899.5		2999.6
H13 IV	RSA''	11 lower	Uluzzian	B10	CLC0605	Cervid	1105.6	1180.7	1197.6	1427.7	1550.8	1648.8	2131.1	2793	2883.6	2899.6	3018.5	3033.6
H13 IV	RSA''	11 lower	Uluzzian	B10	CLC0606	Bos/Bison	1105.5	1192.6	1208.6	1427.7	1580.7	1648.8	2131	2794	2853.4	2869.4	3019	3034.7
H13 IV	RSA''	11 lower	Uluzzian	B10	CLC0607	Equus sp.	1105.5	1182.6	1198.6	1427.7	1550.7		2145.1	2822	2883.5	2899.5		2999.6
H13 IV	RSA''	11 lower	Uluzzian	B10	CLC0608	Equus sp.	1105.5	1182.6	1198.6	1427.7	1550.7	1650.8	2145.1	2822	2883.5	2899.5
H13 IV	RSA''	11 lower	Uluzzian	B10	CLC0609	Bos/Bison	1105.5	1192.8	1208.6	1427.7	1580.7	1648.8	2131		2853.4	2869.4	3019.4	3034.5
H13 IV	RSA''	11 lower	Uluzzian	B10	CLC0610	Equus sp.	1105.5	1182.6	1198.6	1427.7	1550.7	1650.7	2145.1	2822	2883.5	2899.5
H13 IV	RSA''	11 lower	Uluzzian	B10	CLC0611	Fail
H13 IV	RSA''	11 lower	Uluzzian	B10	CLC0612	Cervid	1105.5	1180.5	1196.6	1427.7	1550.7	1648.7	2131	2793.4	2883.5	2899.5	3018.6	3033.6
H13 IV	RSA''	11 lower	Uluzzian	B10	CLC0613	Equus sp.	1105.5	1182.6	1198.6	1427.7	1550.7	1650.6	2145.1	2822	2883.5	2899.5		2999.6
H13 IV	RSA''	11 lower	Uluzzian	B10	CLC0614	Fail
H13 IV	RSA''	11 upper/lower	Uluzzian	B10	CLC0615	Bos/Bison	1105.5	1192.5	1208.6	1427.6	1580.7	1648.7	2131	2793	2853.3	2869.3	3019
H13 IV	RSA''	11 upper/lower	Uluzzian	B10	CLC0616	Capra sp.	1105.6	1180.6	1196.6	1427.7	1580.7	1648.8	2131.1	2793.4	2886.5	2899.5		3094
H13 IV	RSA''	11 upper/lower	Uluzzian	B10	CLC0617	Equus sp.	1105.6	1182.6	1198.6	1427.7	1550.8	1650.8	2145.1	2821	2883.6	2899.6		3000
H13 IV	RSA''	11 upper/lower	Uluzzian	B10	CLC0618	Equus sp.	1105.6	1182.6	1198.6	1427.7	1550.8	1650.8	2145.1	2821	2883.6	2899.6
H13 IV	RSA''	11 upper/lower	Uluzzian	B10	CLC0619	Equus sp.	1105.6	1182.6	1198.6	1427.7	1550.8	1650.8	2145.1	2821	2883.6	2899.6		2999.6
H13 IV	RSA''	11 upper/lower	Uluzzian	B10	CLC0620	Equus sp.	1105.6	1182.6	1198.6	1427.7	1550.8	1650.8	2145.1	2821	2883.6	2899.6		3000
H13 IV	RSA''	11 upper/lower	Uluzzian	B10	CLC0621	Equus sp.	1105.6	1182.6	1198.6	1427.7	1550.8	1650.8	2145.1	2821	2883.6	2899.6		3000
H13 IV	RSA''	11 upper/lower	Uluzzian	B10	CLC0622	Equus sp.	1105.6	1182.6	1198.6	1427.7	1550.8	1650.8	2145.1	2821	2883.6	2899.6		3000
H13 IV	RSA''	11 upper/lower	Uluzzian	B10	CLC0623	Cervid	1105.6	1180.6	1196.6	1427.7	1550.8	1648.7	2131.2		2883.7	2899.7	3019.7	3034.9
H13 IV	RSA''	11 upper/lower	Uluzzian	B10	CLC0624	Equus sp.	1105.6	1182.6	1198.6	1427.7	1550.8		2145.1	2821	2883.6	2899.6
H13 IV	RSA''	11 upper/lower	Uluzzian	B10	CLC0625	Unidentified Deer	1105.5	1181.6	1197.6	1427.7	1550.7	1648.8			2883.4	2899.4	3020
H13 IV	RSA''	11 upper/lower	Uluzzian	B10	CLC0626	Bos/Bison	1105.5	1192.7	1208.7	1427.8	1580.8	1648.9	2131.2	2794	2853.6	2869.6	3019
H13 IV	RSA''	11 upper/lower	Uluzzian	B10	CLC0627	Equus sp.	1105.6	1182.6	1198.6	1427.7	1550.8		2145.1	2821	2883.6	2899.6		2999.6
H13 IV	RSA''	12 upper	Uluzzian	B10	CLC0628	Fail
H13 IV	RSA''	12 upper	Uluzzian	B10	CLC0629	Fail
H13 IV	RSA''	12 upper	Uluzzian	B10	CLC0630	Fail
H13 IV	RSA''	12 upper	Uluzzian	B10	CLC0631	Bos/Bison	1105.6	1192.6	1208.7	1427.7	1580.7	1648.8	2131.1		2853.5	2869.5	3018.5	3033.6
H13 IV	RSA''	12 upper	Uluzzian	B10	CLC0632	Fail
H13 IV	RSA''	12 upper	Uluzzian	B10	CLC0633	Fail
H13 IV	RSA''	12 upper	Uluzzian	B10	CLC0634	Fail
H13 IV	RSA''	12 upper	Uluzzian	B10	CLC0635	Fail
H13 IV	RSA''	12 upper	Uluzzian	B10	CLC0636	Equus sp.	1105.6	1182.6	1198.6	1427.7	1550.8		2145.1		2883.6	2899.6
H13 IV	RSA''	12 upper	Uluzzian	B10	CLC0637	Fail
H14 I	RSA''	12 upper	Uluzzian	B11	CLC0638	Cervid	1105.5	1180.5	1196.6	1427.7	1550.8	1648.7	2130.8		2882.9	2898.8	3018.8
H14 I	RSA''	12 upper	Uluzzian	B11	CLC0639	Bos/Bison	1105.6	1192.7	1208.7	1427.7	1580.7	1648.8	2130.9		2853	2869	3018.9	3034
H14 I	RSA''	12 upper	Uluzzian	B11	CLC0640	Bos/Bison	1105.6	1192.7	1208.7	1427.7	1580.7	1648.8	2130.9	2792.3	2853	2869	3018.9	3034
H14 I	RSA''	12 upper	Uluzzian	B11	CLC0641	Cervid	1105.5	1180.5	1196.6	1427.7	1550.8	1648.7	2130.8	2791	2882.9	2898.8	3017	3032
H14 I	RSA''	12 upper	Uluzzian	B11	CLC0642	Bos/Bison	1105.6	1192.7	1208.7	1427.7	1580.7	1648.7	2130.1	2791.2	2852	2868	3016.8	3031.7
H14 I	RSA''	12 upper	Uluzzian	B11	CLC0643	Fail
H14 I	RSA''	12 upper	Uluzzian	B11	CLC0644	Bos/Bison	1105.5		1208.7	1427.7	1580.5	1648.5	2130.5		2852	2868	3017.1	3033
H14 II	RSA''	12 upper	Uluzzian	B11	CLC0645	Bos/Bison	1105.6	1192.7	1208.7	1427.6	1580.6	1648.6	2130.5	2791.7	2853	2869	3017.3	3032.4
H14 II	RSA''	12 upper	Uluzzian	B11	CLC0646	Fail
H14 II	RSA''	12 upper	Uluzzian	B11	CLC0647	Fail
H14 II	RSA''	12 upper	Uluzzian	B11	CLC0648	Fail
H14 II	RSA''	12 upper	Uluzzian	B11	CLC0649	Fail
H14 II	RSA''	12 upper	Uluzzian	B11	CLC0650	Equus sp.	1105.5	1182.6	1198.6	1427.7	1550.8	1650.7	2144.9	2820.8	2882.9	2898.9		2999.9
H14 III	RSA''	11 lower	Uluzzian	B11	CLC0651	Bos/Bison	1105.6	1192.7	1208.7	1427.7	1580.7	1648.8	2130.9		2853	2869	3018.9	3034
H14 III	RSA''	11 lower	Uluzzian	B11	CLC0652	Fail
H14 III	RSA''	11 lower	Uluzzian	B11	CLC0653	Equus sp.	1105.5	1182.6	1198.6	1427.7	1550.8	1650.7	2144.9	2820.8	2882.9	2898.9		2999.9
H14 III	RSA''	11 lower	Uluzzian	B11	CLC0654	Equus sp.	1105.5	1182.6	1198.6	1427.7	1550.8	1650.7	2144.9	2820.8	2882.9	2898.9		2999.9
H14 III	RSA''	11 lower	Uluzzian	B11	CLC0655	Bos/Bison	1105.6	1192.7	1208.7	1427.7	1580.7	1648.7	2130.1	2791.7	2853	2869	3017.1	3033
H14 III	RSA''	11 lower	Uluzzian	B11	CLC0656	Equus sp.	1105.5	1182.6	1199.6	1427.7	1550.8		2144.9	2820.8	2882.9	2898.9		2999.9
H14 III	RSA''	11 lower	Uluzzian	B11	CLC0657	Cervid	1105.5	1180.6		1427.6	1550.5	1648.5	2130	2791	2883	2898	3016	3032
H14 III	RSA''	11 lower	Uluzzian	B11	CLC0658	Equus sp.	1105.5	1182.6	1199.6	1427.6	1550.6	1650.5	2144	2819.3	2882	2898
H14 III	RSA''	11 lower	Uluzzian	B11	CLC0659	Cervid	1105.5	1181.1	1196.6	1427.6	1550.5	1648.5	2130	2791	2883	2898	3016	3032
H14 III	RSA''	11 lower	Uluzzian	B11	CLC0660	Equus sp.	1105.5	1182.6	1199.6	1427.7	1550.7	1650.7	2145.2	2821	2883.9	2899.9		3001
H14 III	RSA''	11 lower	Uluzzian	B11	CLC0661	Cervid	1105.6	1180.6	1197.7	1427.7	1550.7	1648.8	2130.9	2792.9	2883	2898.9	3017.9	3034
H14 III	RSA''	11 lower	Uluzzian	B11	CLC0662	Bos/Bison	1105.6	1192.6	1208.7	1427.7	1580.7	1648.8	2130.9	2792.9	2853	2869	3017.9	3033
H14 III	RSA''	11 lower	Uluzzian	B11	CLC0663	Bos/Bison	1105.6	1192	1208.7	1427.7	1580.7	1648.8	2130.9	2792.9	2853	2869	3017.9
H14 III	RSA''	11 lower	Uluzzian	B11	CLC0664	Equus sp.	1105.6	1182.7	1198.6	1427.6	1550.6	1650.5	2144	2819	2883	2898.2		2999
H14 III	RSA''	11 lower	Uluzzian	B11	CLC0665	Bos/Bison	1105.6	1192.6	1208.7	1427.7	1580.7	1648.8	2130.9	2792.9	2853	2869	3017.9
H14 III	RSA''	11 lower	Uluzzian	B11	CLC0666	Bos/Bison	1105.6	1192.6	1208.7	1427.7	1580.7	1648.8	2130.9	2792.9	2853	2869	3017.9
H14 III	RSA''	11 lower	Uluzzian	B11	CLC0667	Equus sp.	1105.6	1182.7	1198.7	1427.7	1550.7	1650.7	2144	2821	2883	2899		3000
H14 III	RSA''	11 lower	Uluzzian	B11	CLC0668	Fail
H14 III	RSA''	11 lower	Uluzzian	B11	CLC0669	Equus sp.	1105.6	1182.6	1199.6	1427.7	1550.6	1650.6	2144.5	2819.7	2883	2898		2999
H14 III	RSA''	11 lower	Uluzzian	B11	CLC0670	Equus sp.	1105.6	1182.6	1199.6	1427.7	1550.6	1650.6		2822	2883	2898
H14 III	RSA''	11 lower	Uluzzian	B11	CLC0671	Fail
H14 III	RSA''	11 lower	Uluzzian	B11	CLC0672	Bos/Bison	1105.5	1192.6	1208.6	1427.7	1580.8	1648.8	2131.1	2793.7	2853.9	2869.8	3018.9	3034.5
H14 III	RSA''	11 lower	Uluzzian	B11	CLC0673	Bos/Bison	1105.6	1192.6	1208.7	1427.7	1580.7	1648.8	2130.9	2792.9	2853	2869	3017.9	3033
H14 III	RSA''	11 lower	Uluzzian	B11	CLC0674	Equus sp.	1105.6	1182.6	1198.6	1427.6	1550.6	1650.5	2144	2819	2883	2898.2
H14 III	RSA''	11 lower	Uluzzian	B11	CLC0675	Equus sp.	1105.6	1182.7	1198.6	1427.6	1550.6	1650.5	2144	2819	2883	2898.2
H14 III	RSA''	11 lower	Uluzzian	B11	CLC0676	Bos/Bison	1105.5	1192.7	1208.7	1427.7	1580.7	1648.8	2130.9	2791	2853	2869	3017.9	3032
H14 III	RSA''	11 lower	Uluzzian	B11	CLC0677	Equus sp.	1105.6	1182.6	1199.7	1427.7	1550.7		2144	2818	2882.6	2898.7		2998
H14 III	RSA''	11 lower	Uluzzian	B11	CLC0678	Equus sp.	1105.6	1182.7	1198.7	1427.7	1550.7		2144		2883
H14 III	RSA''	11 lower	Uluzzian	B11	CLC0679	Equus sp.	1105.6	1182.7	1198.7	1427.7	1550.7	1650.7	2144	2820.6	2883.7	2899.7	2983.7	2999.8
H14 III	RSA''	12 upper	Uluzzian	B11	CLC0680	Bos/Bison	1105.6	1192.6	1208.7	1427.7	1580.7	1648.8	2130.9	2792.9	2853	2869	3017.9	3033
H14 III	RSA''	12 upper	Uluzzian	B11	CLC0681	Equus sp.	1105.6	1182.6	1199.6	1427.7	1550.6	1650.6	2144.5	2819.7	2883	2898		2999
H14 III	RSA''	12 upper	Uluzzian	B11	CLC0682	Fail
H14 III	RSA''	12 upper	Uluzzian	B11	CLC0683	Bos/Bison	1105.5	1192.6	1208.6	1427.7	1580.8	1648.8	2131.1	2793.7	2853.9	2869.8
H14 III	RSA''	12 upper	Uluzzian	B11	CLC0684	Equus sp.	1105.5	1182.6	1198.6	1427.6	1550.5	1649.5	2144	2819.2	2882	2898		2998
H14 III	RSA''	12 upper	Uluzzian	B11	CLC0685	Cervid	1105.5	1181.6	1196.5	1427.7	1550.6	1648.7	2130	2791.3	2883	2898	3017.6	3033
H14 III	RSA''	12 upper	Uluzzian	B11	CLC0686	Cervid	1105.5	1181.6	1196.5	1427.7	1550.6	1648.7	2130	2791.3	2883	2898	3016	3032
H14 III	RSA''	12 upper	Uluzzian	B11	CLC0687	Cervid	1105.5	1181.6	1196.5	1427.7	1550.6	1648.7	2130	2791.3	2883	2898	3016	3032
H14 III	RSA''	12 upper	Uluzzian	B11	CLC0688	Equus sp.	1105.5	1182.6	1198.6	1427.6	1550.5	1649.5	2144	2819.2	2882	2898		2998
H14 III	RSA''	12 upper	Uluzzian	B11	CLC0689	Equus sp.	1105.5	1182.6	1198.6	1427.6	1550.5	1649.5	2144	2820.6	2882	2898		2998
H14 III	RSA''	12 upper	Uluzzian	B11	CLC0690	Equus sp.	1105.5	1182.6	1198.6	1427.6	1550.5	1649.5	2144	2819.2	2882	2898		2999.6
H14 III	RSA''	12 upper	Uluzzian	B11	CLC0691	Equus sp.	1105.5	1182.6	1198.6	1427.6	1550.5	1649.5	2144	2819.2	2882	2898		3000
H14 IV	RSA''	12 upper	Uluzzian	B11	CLC0692	Bos/Bison	1105.5	1192.6	1208.8	1427.7	1580.7	1648.8	2131.1		2853.6	2869.6	3019
H14 IV	RSA''	12 upper	Uluzzian	B11	CLC0693	Equus sp.	1105.5	1182.6	1198.6	1427.6	1550.5	1649.5	2144	2819.2	2882	2898		3000
H14 IV	RSA''	12 upper	Uluzzian	B11	CLC0694	Cervid	1105.6	1180.6	1197.6	1427.7	1550.7	1648.8	2131.1	2794	2883.6	2899.6	3019.6	3034.7
H14 IV	RSA''	12 upper	Uluzzian	B11	CLC0695	Cervid	1105.6	1180.6	1197.6	1427.7	1550.7	1648.8	2131.1	2793	2883.6	2899.6	3018.6	3034.7
H14 IV	RSA''	12 upper	Uluzzian	B11	CLC0696	Cervid	1105.5	1181.6	1196.5	1427.7	1550.6	1648.7	2130	2791.3	2883	2898	3017.6	3033
H14 IV	RSA''	12 upper	Uluzzian	B11	CLC0697	Equus sp.	1105.5	1182.6	1198.6	1427.6	1550.5	1650	2144		2882	2898
H14 IV	RSA''	12 upper	Uluzzian	B11	CLC0698	Cervid	1105.5	1181.6	1196.5	1427.7	1550.6	1648.7	2130	2791.3	2883	2898	3016	3032
H14 IV	RSA''	12 upper	Uluzzian	B11	CLC0699	Fail
H14 IV	RSA''	12 upper	Uluzzian	B11	CLC0700	Fail
H14 IV	RSA''	12 upper	Uluzzian	B11	CLC0701	Bos/Bison	1105.6	1192.7	1208.7	1427.6	1580.6	1648.6	2130.5	2794.6	2853	2869	3017	3033.1
H14 IV	RSA''	12 upper	Uluzzian	B11	CLC0702	Fail
H14 IV	RSA''	12 upper	Uluzzian	B11	CLC0703	Fail
H14 IV	RSA''	12 upper	Uluzzian	B11	CLC0704	Equus sp.	1105.5	1182.6	1198.6	1427.6	1550.5	1649.5	2144	2819.2	2882	2898		3000
G14 II	RSA''	12 upper	Uluzzian	B11	CLC0705	Equus sp.	1105.5	1182.6	1198.6	1427.6	1550.5	1649.5	2144	2819.2	2882	2898
G14 II	RSA''	12 upper	Uluzzian	B11	CLC0706	Bos/Bison	1105.5	1192.6	1208.6	1427.6	1580.7	1648.7	2131.1	2794.4	2853.5	2869.5	3019.6	3034.7
G14 II	RSA''	12 upper	Uluzzian	B11	CLC0707	Equus sp.	1105.6	1182	1199.7	1427.7	1550.6
G14 II	RSA''	12 upper	Uluzzian	B11	CLC0708	Equus sp.	1105.6	1182.6	1199.6	1427.7	1550.6	1650.6	2144		2882
G14 II	RSA''	12 upper	Uluzzian	B11	CLC0709	Equus sp.	1105.6	1182.7	1198.7	1427.7	1550.7	1650.6	2144.1		2882
G14 II	RSA''	12 upper	Uluzzian	B11	CLC0710	Equus sp.	1105.6	1182.6	1199.6	1427.7	1550.7
E14 I	RSA	10 upper	Protoaurignacian	B12	CLC0711	Bos/Bison	1105.6		1208.8	1427.7		1648.7	2130.1		2852	2867	3017	3032
E14 I	RSA	10 upper	Protoaurignacian	B12	CLC0712	Fail
E14 I	RSA	10 upper	Protoaurignacian	B12	CLC0713	Equus sp.	1105.6	1182.7	1198.8	1427.8			2144	2819	2883	2899		2998
E14 I	RSA	10 upper	Protoaurignacian	B12	CLC0714	Bos/Bison	1105.6	1193.7	1208.7	1427.7		1648.8	2130.1		2852	2868	3016.9	3032
E14 I	RSA	10 upper	Protoaurignacian	B12	CLC0715	Equus sp.	1105.6	1182.7	1198.8	1427.8	1550.7		2144	2819	2883	2899
E14 I	RSA	10 upper	Protoaurignacian	B12	CLC0716	Equus sp.	1105.5	1182.6	1199.6	1427.8			2144.7	2819.7	2883	2899		2999
E14 I	RSA	10 upper	Protoaurignacian	B12	CLC0717	Rupicapra	1105.5	1180.6		1427.7	1580.7	1648.8	2131.1	2793.4	2883.5	2899.5		3034.9
E14 I	RSA	10 upper	Protoaurignacian	B12	CLC0718	Fail
E14 I	RSA	10 upper	Protoaurignacian	B12	CLC0719	Bos/Bison	1105.5		1208.6	1427.7	1580.7	1648.8	2131.1	2793.4	2853.6	2869	3019	3033.7
E14 I	RSA	10 upper	Protoaurignacian	B12	CLC0720	Equus sp.	1105.5	1182.5	1198.7	1427.6	1550.6
E14 I	RSA	10 upper	Protoaurignacian	B12	CLC0721	Bos/Bison	1105.5	1192.6	1208.6	1427.7	1580.7	1648.8	2131.1		2853.7	2869.7	3019.7
E14 I	RSA	10 upper	Protoaurignacian	B12	CLC0722	Equus sp.	1105.5	1182.6	1199.6	1427.7	1550.7	1650.7			2883.6
E14 IV	RSA	12 upper	Uluzzian	B12	CLC0723	Equus sp.	1105.6	1182.7	1198.8	1427.8	1550.7	1650.7	2144	2819	2883	2899		2998
E14 IV	RSA	12 upper	Uluzzian	B12	CLC0724	Capra sp.	1105.5		1197.6	1427.7	1580.7	1648.8	2131.1	2793.4	2883.5	2899.5		3093.6
E14 IV	RSA	12 upper	Uluzzian	B12	CLC0725	Cervid	1105.6	1181.6	1197.6	1427.7	1550.7	1648.8	2131.1		2883.5	2899.6	3016	3032
E14 IV	RSA	12 upper	Uluzzian	B12	CLC0726	Equus sp.	1105.6	1182.7	1198.8	1427.8	1550.7	1650.7	2145	2821	2883.5	2899.5		2998
E14 IV	RSA	12 upper	Uluzzian	B12	CLC0727	Equus sp.	1105.5	1182.6	1199.6	1427.8	1550.8		2144.7	2819.7	2883	2899		2999
E14 I	RSA	10 upper	Protoaurignacian	B12	CLC0728	Equus sp.	1105.5	1182.6	1199.6	1427.8	1550.8		2144.7	2819.7	2883	2899		2999
E14 I	RSA	10 upper	Protoaurignacian	B12	CLC0729	Fail
E14 I	RSA	10 upper	Protoaurignacian	B12	CLC0730	Cervid	1105.5	1181.6	1197.6	1427.6	1550.7	1648.8	2131.1		2883.5	2899.5	3019.6	3033.5
E14 I	RSA	10 upper	Protoaurignacian	B12	CLC0731	Cervid	1105.6	1181.6	1197.6	1427.7	1550.8	1648.9	2131.1	2794.4	2883.6	2899.5	3019.5	3035
E14 I	RSA	10 upper	Protoaurignacian	B12	CLC0732	Equus sp.	1105.5	1182.5		1427.7	1550.7		2145.1		2883.6	2899.6	2984.6	2999.7
F14 I	RSA	11 lower	Uluzzian	B12	CLC0733	Fail
G14 I	RSA	11 lower	Uluzzian	B12	CLC0734	Bos/Bison	1105.6		1208.7	1427.8	1580.8	1648.7	2130.1	2792	2853	2869.6	3017	3032
G14 I	RSA	11 lower	Uluzzian	B12	CLC0735	Equus sp.	1105.6	1182.7	1199.7	1427.8	1550.7	1650	2144.1	2819	2882	2898		2999
G14 I	RSA	11 lower	Uluzzian	B12	CLC0736	Equus sp.	1105.6	1182.7		1427.8			2144.1		2882	2898		2999
G14 I	RSA	11 lower	Uluzzian	B12	CLC0737	Equus sp.	1105.6	1182.7	1199.7	1427.8	1550.7		2144.1	2818	2882	2898		2999
G14 I	RSA	11 lower	Uluzzian	B12	CLC0738	Equus sp.	1105.6		1199.7	1427.8	1550.7		2144.1	2818	2882	2898		2999
G14 I	RSA	11 lower	Uluzzian	B12	CLC0739	Equus sp.	1105.6	1182.7	1199.7	1427.8	1550.7		2144.1	2819.9	2882	2898	2982.7	2999
G14 I	RSA	11 lower	Uluzzian	B12	CLC0740	Equus sp.	1105.6	1182.6		1427.7	1550.7	1650.8	2145.1	2821	2883.6	2899.6
G14 I	RSA	11 lower	Uluzzian	B12	CLC0741	Equus sp.	1105.5	1182.7	1199.7	1427.8	1550.8		2145.2	2822	2883.8	2899.8		3000
G14 I	RSA	11 lower	Uluzzian	B12	CLC0742	Equus sp.	1105.6	1182.7	1199.6	1427.7			2145.2	2821.5	2883.6	2899.6		3000.7
G14 I	RSA	11 lower	Uluzzian	B12	CLC0743	Equus sp.	1105.5	1182.6	1199.7	1427.7			2145.2	2821.6	2883.6	2899.7		2999.8
G14 IV	RSA	11 upper	Uluzzian	B12	CLC0744	Equus sp.	1105.5	1182.7	1199.7	1427.7	1550.8		2145.3		2883.6	2899.6	2984	2999.9
G14 IV	RSA	11 upper	Uluzzian	B12	CLC0745	Equus sp.	1105.5	1182.6		1427.8	1550.8		2145.6		2883.7	2899.6		3000
G14 IV	RSA	11 upper	Uluzzian	B12	CLC0746	Equus sp.	1105.6	1182.7	1199.7	1427.8	1550.7		2144.1	2819	2882	2898		2999
G14 IV	RSA	11 upper	Uluzzian	B12	CLC0747	Equus sp.	1105.6	1182.7	1199.7	1427.8	1550.7		2144.1	2819	2882	2898	2982	2999
G14 IV	RSA	11 upper	Uluzzian	B12	CLC0748	Equus sp.	1105.6	1182.7	1199.7	1427.8	1550.7		2144.1	2818	2882	2898		2999
G14 IV	RSA	11 upper	Uluzzian	B12	CLC0749	Fail
G14 IV	RSA	11 upper	Uluzzian	B12	CLC0750	Cervid	1105.5	1181.7	1196.7	1427.8	1550.8	1648.9	2130.8	2792.8	2883	2898.7	3017.4	3032.4
G14 IV	RSA	11 upper	Uluzzian	B12	CLC0751	Bos/Bison	1105.6	1193.7	1208.7	1427.9		1648.9	2130.8	2792.9	2853	2869	3017.4	3032.4
G14 IV	RSA	11 upper	Uluzzian	B12	CLC0752	Bos/Bison	1105.6		1208.7	1427.9	1580.6	1648.9	2130.8	2792.9	2853	2869	3017.4
G14 IV	RSA	11 upper	Uluzzian	B12	CLC0753	Equus sp.	1105.6	1182.6		1427.7	1550.8		2145.2	2821	2883.7	2899.6
G14 IV	RSA	11 upper	Uluzzian	B12	CLC0754	Bos/Bison	1105.6		1208.7	1427.8		1648.9	2131.2	2794	2853.8	2869.8	3018.8	3033.9
G14 IV	RSA	11 upper	Uluzzian	B12	CLC0755	Bos/Bison	1105.5			1427.7		1648.8	2131.1		2853.7		3019.7
H12 I	RSA	11 lower	Uluzzian	B12	CLC0756	Equus sp.	1105.5	1182.6		1427.7	1550.8		2145.1	2821.5	2883.6	2899.5		2999.9
H12 I	RSA	11 lower	Uluzzian	B12	CLC0757	Bos/Bison	1105.6		1208.7	1427.8	1580.8	1648.9	2131.1	2793.7	2853.8	2869	3019.8
H12 I	RSA	11 lower	Uluzzian	B12	CLC0758	Fail
H12 I	RSA	11 lower	Uluzzian	B12	CLC0759	Equus sp.	1105.6	1182.6	1199.6	1427.7	1550.7	1650.8	2145.1	2821.5	2883.6	2899.5	2984	2999.7
H12 I	RSA	11 lower	Uluzzian	B12	CLC0760	Equus sp.	1105.6	1182.6		1427.7	1550.7		2145.1	2821.5	2883.6	2899.5		2999.7
H12 I	RSA	11 lower	Uluzzian	B12	CLC0761	Cervid	1105.6	1181.6	1196.6	1427.7	1550.7	1648.8	2131.1	2793.4	2883.6	2899.5	3018.6	3034.7
H12 I	RSA	11 lower	Uluzzian	B12	CLC0762	Equus sp.	1105.6	1182.6		1427.7	1550.7	1650	2145.1	2821.5	2883.6	2899.6		3000
H12 I	RSA	11 lower	Uluzzian	B12	CLC0763	Bos/Bison	1105.6	1192.7	1208.7	1427.8	1580.8	1648.8	2131.1	2795	2853.6	2869.6	3019.6	3034.7
H12 I	RSA	11 lower	Uluzzian	B12	CLC0764	Equus sp.	1105.5	1182.6	1198.6	1427.7	1550.7	1650.7			2883.8	2900.5
H14 I	RSA	11 upper	Uluzzian	B12	CLC0765	Fail
H14 I	RSA	11 upper	Uluzzian	B12	CLC0766	Cervid	1105.6	1180.6	1196.6	1427.7	1550.7	1648.8			2883.6	2899	3019
H14 I	RSA	11 upper	Uluzzian	B12	CLC0767	Fail
H14 I	RSA	11 upper	Uluzzian	B12	CLC0768	Equus sp.	1105.5	1182.6		1427.7	1550.8				2883.7
H14 I	RSA	11 upper	Uluzzian	B12	CLC0769	Fail
H14 I	RSA	11 upper	Uluzzian	B12	CLC0770	Equus sp.	1105.6	1182.6	1199.6	1427.7	1550.7	1650.8	2145.1	2821.5	2883.6	2899.5	2984	2999.7
H14 IV	RSA	11 lower	Uluzzian	B12	CLC0771	Fail
H14 IV	RSA	11 lower	Uluzzian	B12	CLC0772	Rupicapra	1105.6		1197.7	1427.7	1580.8		2131.1	2794	2883.6	2899.5	3019
H14 IV	RSA	11 lower	Uluzzian	B12	CLC0773	Cervid	1105.6	1181.6	1196.6	1427.7	1550.7	1648.8	2131.1	2793.4	2883.6	2899.5	3018.6
H14 IV	RSA	11 lower	Uluzzian	B12	CLC0774	Rupicapra	1105.5	1181.6		1427.7	1580.8	1648.8	2131.1	2793	2883.6	2899.6	3019.5
H14 IV	RSA	11 lower	Uluzzian	B12	CLC0775	Unidentified Deer	1105.5	1181.7	1197.7	1427.8	1550.8	1648.9			2883.6
H14 IV	RSA	11 lower	Uluzzian	B12	CLC0776	Fail
H14 IV	RSA	11 lower	Uluzzian	B12	CLC0777	Cervid	1105.6	1180.6	1196.6	1427.7	1550.7	1648.8	2131.1	2793.4	2883.6	2899	3018
F13 I-II	CGR	30	Mousterian	B12	CLC0778	Unidentified Deer	1105.5	1181.7	1197	1427.7	1550.8	1648.9			2883.7	2899.7
F13 I-II	CGR	30	Mousterian	B12	CLC0779	Cervid	1105.5			1427.7	1550.7	1648.8	2131.1	2794	2883.6	2899.6	3020	3034.7
F13 I-II	CGR	30	Mousterian	B12	CLC0780	Cervid	1105.5	1181.4	1197.7	1427.7	1550.7	1648.7	2130.5		2883	2898	3017.4
F13 I-II	CGR	30	Mousterian	B12	CLC0781	Bos/Bison	1105.6	1192.6		1427.8	1580.8	1648.8	2131.2	2794	2853.6	2868.6	3019.6
F13 I-II	CGR	30	Mousterian	B12	CLC0782	Fail
F13 I-II	CGR	30	Mousterian	B12	CLC0783	Cervid	1105.6	1180.7		1427.7	1550.8	1648.9	2131.1	2793.7	2883.8	2899	3017.4	3034.9
F13 I-II	CGR	30	Mousterian	B12	CLC0784	Unidentified Deer	1105.6	1181.6		1427.8	1550.8	1648.8			2883.7	2900	3019.6
F13 I-II	CGR	30	Mousterian	B12	CLC0785	Fail
F13 I-II	CGR	29	Mousterian	B12	CLC0786	Unidentified deer	1105.6			1427.8	1550.8	1648.8	2135		2883.6	2899.7	3019.6
F13 I-II	CGR	29	Mousterian	B12	CLC0787	Cervid	1105.6	1181.1		1427.8	1550.8	1649	2131.3	2793.6	2883.8	2899.8	3017.4	3034.9
F13 I-II	CGR	29	Mousterian	B12	CLC0788	Fail
F13 I-II	CGR	29	Mousterian	B12	CLC0789	Unidentified deer	1105.5			1427.7	1550.8	1648.9			2883.7	2899.7
F13 I-II	CGR	29	Mousterian	B12	CLC0790	Cervid	1105.5			1427.7	1550.7	1648.8	2131.1	2794.5	2883.7	2899.7	3017.4	3034.8
F13 I-II	CGR	29	Mousterian	B12	CLC0791	Fail
G13	CGR	31	Mousterian	B12	CLC0792	Cervid	1105.7			1427.8	1550.7	1648.8	2130.6		2883	2898	3018.6	3034.7
G13	CGR	31	Mousterian	B12	CLC0793	Cervid	1105.6	1181.6		1427.7	1550.8	1648.8	2131.1	2793	2883.6	2898.5	3019.6	3034
G13	CGR	31	Mousterian	B12	CLC0794	Unidentified Deer	1105.6			1427.7	1550.8	1648.8			2883.7	2900.7
G13	CGR	31	Mousterian	B12	CLC0795	Cervid	1105.6	1181	1197	1427.7	1550.8	1648.8	2131.1		2883.7	2899.8	3017	3033
G13	CGR	31	Mousterian	B12	CLC0796	Fail
G13	CGR	31	Mousterian	B12	CLC0797	Rupicapra	1105.6	1181.6		1427.7	1580.8	1648.8	2131.1	2793.5	2883.6	2899.6	3019.6
G13	CGR	31	Mousterian	B12	CLC0798	Cervid	1105.6			1427.8	1550.8	1649	2131.3	2793.6	2883.8	2899.8	3017	3033
G13 IV	CGR	29	Mousterian	B12	CLC0799	Cervid	1105.6	1181.1		1427.8	1550.8	1649	2131.3	2793.6	2883.8	2899.8	3017	3033
G13 IV	CGR	29	Mousterian	B12	CLC0800	Cervid	1105.6			1427.8	1550.8	1649	2131.3	2793.6	2883.8	2899.8	3017	3033
G13 IV	CGR	29	Mousterian	B12	CLC0801	Cervid	1105.6	1181.7	1197.7	1427.8	1550.8	1648.8	2131.3	2793.6	2883.8	2899.8	3017	3033
G13 IV	CGR	29	Mousterian	B12	CLC0802	Cervid/Rupicapra	1105.5	1181.5		1427.7		1648.8	2131.2		2883.7	2899.7	3019.7	3034.9
G13 IV	CGR	29	Mousterian	B12	CLC0803	Cervid/Rupicapra	1105.5			1427.7		1648.8	2130.6		2883	2898	3017.6	3032.7
G13 IV	CGR	29	Mousterian	B12	CLC0804	Capreolus capreolus	1105.8	1181.9		1427.7		1648.8	2130.7		2883	2898	3034	3059

## Sheet: Bell
	RSA''		RPI		PIE	RSI'
	Upper 11	Lower 11	Upper 12	13	Upper 14	Lower 15- Upper 16	Lower 16	Total
Equid	13	68	53	2	3	5		144
Cervid	3	7	15	22	18	15	3	83
Bovinae	2	4	15	2	4	2	1	30
Ovis/Rupicapra			6	2	4	10	2	24
Suid		1	3	1				5
Capra			1		1		1	3
Fails		1	4	1				6
Total	18	81	97	30	30	32	7	295
